# Supplementary material for: Assessment of carbon dioxide removal potentialviaBECCS in a carbon-neutral Europe
Source: Royal Society of Chemistry journal article supplement (doi:10.1039/d1ee00642h), 2021-01-01
Supplement: d1ee00642h1.xlsx [file d1ee00642h1.xlsx]

## Sheet: Contents
	Supplemetary materials for: Assessment of carbon dioxide removal potential via BECCS in a carbon-neutral Europe
	Authors: Lorenzo Rosa, Daniel Sanchez, Marco Mazzotti
	Contact information: lorenzo.rosa@ipe.mavt.ethz.ch
	Table	Description
	Table S1	Plant-specific biogenic and fossil CO2 emissions (million tons CO2 per year) from PULP AND PAPER FACILITIES
	Table S2	Plant-specific biogenic and fossil CO2 emissions (million tons CO2 per year) from WASTEWATER TREATMENT FACILITIES
	Table S3	Plant-specific biogenic and fossil CO2 emissions (million tons CO2 per year) from INCINERATORS FACILITIES
	Table S4	Plant-specific biogenic and fossil CO2 emissions (million tons CO2 per year) from BIOPOWER FACILITIES

## Sheet: Table S1
reportingYear	Facility_INSPIRE_ID	parentCompanyName	nameOfFeature	mainActivityCode	mainActivityName	pointGeometryLon	pointGeometryLat	streetName	buildingNumber	postalCode	city	countryCode	pollutantCode	pollutantName	medium	Biogenic CO2 (Mtons CO2)	Fossil CO2 (Mtons CO2)
2017	AT.CAED/9008390397176.FACILITY	Fritz EGGER GmbH & Co OG	Fritz EGGER GmbH & Co. OG	6(b)	Industrial plants for the production of paper and board and other primary wood products (such as chipboard, fibreboard and plywood)	15.6918	48.2596	Tiroler Strasse	16	3105	Unterradlberg	AT	CO2	Carbon dioxide	AIR	0.17248	0.02464
2017	AT.CAED/9008390404355.FACILITY	Norske Skogindustrier ASA	Norske Skog Bruck GmbH	6(b)	Industrial plants for the production of paper and board and other primary wood products (such as chipboard, fibreboard and plywood)	15.2771	47.4169	Fabriksgasse	10	8600	Berndorf	AT	CO2	Carbon dioxide	AIR	0.21945	0.03135
2017	AT.CAED/9008390470305.FACILITY	keine	M. Kaindl OG	6(b)	Industrial plants for the production of paper and board and other primary wood products (such as chipboard, fibreboard and plywood)	12.9997	47.8228	Kaindlstrasse	2	5071	Siezenheim	AT	CO2	Carbon dioxide	AIR	0.1386	0.0198
2017	AT.CAED/9008390614785.FACILITY	Heinzel AG	Zellstoff Pöls Aktiengesellschaft	6(a)	Industrial plants for the production of pulp from timber or similar fibrous materials	14.5904	47.2175	Dr. Luigi Angeli Straße	9	8761	Pöls	AT	CO2	Carbon dioxide	AIR	0.77	0.11
2017	AT.CAED/9008390707227.FACILITY	Nettingsdorfer Service Center	Smurfit Kappa Nettingsdorf AG & Co KG	6(b)	Industrial plants for the production of paper and board and other primary wood products (such as chipboard, fibreboard and plywood)	14.2561	48.1831	Nettingsdorfer Straße	40	4053	Kremsdorf	AT	CO2	Carbon dioxide	AIR	0.28336	0.04048
2017	AT.CAED/9008390853801.FACILITY	Mayr-Melnhof Karton AG	Mayr-Melnhof Karton Gesellschaft m.b.H.	6(b)	Industrial plants for the production of paper and board and other primary wood products (such as chipboard, fibreboard and plywood)	15.3281	47.2781	Wannersdorf	80	8130	Frohnleiten	AT	CO2	Carbon dioxide	AIR	0.1078	0.0154
2017	AT.CAED/9008390967331.FACILITY	Fritz EGGER GmbH & Co OG	Fritz EGGER GmbH & Co. OG	6(b)	Industrial plants for the production of paper and board and other primary wood products (such as chipboard, fibreboard and plywood)	12.3999	47.5048	Weiberndorf	20	6380	St. Johann in Tirol	AT	CO2	Carbon dioxide	AIR	0.09702	0.01386
2017	AT.CAED/9008390968734.FACILITY	Gamma (Fiber) Holdings Three Gmbh	AustroCel Hallein GmbH	6(a)	Industrial plants for the production of pulp from timber or similar fibrous materials	13.1087	47.6758	Salzachtalstraße	88	5400	Hallein	AT	CO2	Carbon dioxide	AIR	0.34342	0.04906
2017	AT.CAED/9008390974230.FACILITY	-	FunderMax GmbH	6(b)	Industrial plants for the production of paper and board and other primary wood products (such as chipboard, fibreboard and plywood)	14.3772	46.7581	Klagenfurter Straße	87-89	9300	St. Veit an der Glan	AT	CO2	Carbon dioxide	AIR	0.20713	0.02959
2017	AT.CAED/9008391215714.FACILITY	Prinzhorn Holding	W. Hamburger GmbH	6(b)	Industrial plants for the production of paper and board and other primary wood products (such as chipboard, fibreboard and plywood)	16.1756	47.7073	Aspanger Straße	252	2823	Pitten	AT	CO2	Carbon dioxide	AIR	0.16093	0.02299
2017	BE.WA/103010000.FACILITY	Burgo Ardennes	BURGO ARDENNES sa	6(a)	Industrial plants for the production of pulp from timber or similar fibrous materials	5.5042	49.5498	RUE DE LA PAPETERIE	1/	6760	VIRTON	BE	CO2	Carbon dioxide	AIR	0.8393	0.1199
2017	BG.CAED/004000004.FACILITY	"СВИЛОЗА" АД	Cellulose plant Sviloza	6(a)	Industrial plants for the production of pulp from timber or similar fibrous materials	25.3055	43.6395	Западна индустриална зона	няма	5253	Свищов	BG	CO2	Carbon dioxide	AIR	0.39963	0.05709
2017	BG.CAED/009000022.FACILITY	"МОНДИ СТАМБОЛИЙСКИ" ЕАД	Mondy Stamboliiski papermaking company	6(b)	Industrial plants for the production of paper and board and other primary wood products (such as chipboard, fibreboard and plywood)	24.5223	42.1346	ул. "Заводска"	1	4210	Стамболийски	BG	CO2	Carbon dioxide	AIR	0.44583	0.06369
2017	CH.CAED/000000092.Facility	Papierfabrik Utzenstorf AG	Papierfabrik Utzenstorf AG	6(b)	Industrial plants for the production of paper and board and other primary wood products (such as chipboard, fibreboard and plywood)	7.5572	47.1269	Fabrikstrasse		3427	Utzenstorf	CH	CO2	Carbon dioxide	AIR	0.029799	0.004257
2017	CZ.MZP.J632/CZ13996896.FACILITY	KRONOSPAN CR,spol. s r.o.	KRONOSPAN CR	6(b)	Industrial plants for the production of paper and board and other primary wood products (such as chipboard, fibreboard and plywood)	15.6036	49.4239	Na Hranici	6	58601	Jihlava	CZ	CO2EXCLBIOMASS	Carbon dioxide excluding biomass	AIR	0.111276	0.00667656
2017	CZ.MZP.J632/CZ42968796.FACILITY	KRONOSPAN OSB, spol. s r.o.	KRONOSPAN OSB	6(b)	Industrial plants for the production of paper and board and other primary wood products (such as chipboard, fibreboard and plywood)	15.6039	49.42	Na Hranici	6	58601	Jihlava	CZ	CO2EXCLBIOMASS	Carbon dioxide excluding biomass	AIR	0.122329	0.00733973
2017	CZ.MZP.U423/CZ63876696.FACILITY	Mondi Štětí a.s.	celulozka	6(a)	Industrial plants for the production of pulp from timber or similar fibrous materials	14.3748	50.4612	Litoměřická	272	41108	Štětí	CZ	CO2EXCLBIOMASS	Carbon dioxide excluding biomass	AIR	0.041965	0.005995
2017	EE.KAUR.TTR/35.FACILITY	Repo Vabrikud AS	Repo Vabrikud AS, Püssi puitlaastplaaditehas	6(b)	Industrial plants for the production of paper and board and other primary wood products (such as chipboard, fibreboard and plywood)	27.0456	59.3547	Maidla tee	7	43222	Püssi linn	EE	CO2EXCLBIOMASS	Carbon dioxide excluding biomass	AIR	1.29307	0.0129307
2017	EE.KAUR.TTR/93.FACILITY	Skano Fibreboard OÜ	Skano Fibreboard OÜ, Pärnu ehitusmaterjalide divisjon	6(b)	Industrial plants for the production of paper and board and other primary wood products (such as chipboard, fibreboard and plywood)	24.5288	58.3879	Rääma	31	80044	Pärnu linn	EE	CO2EXCLBIOMASS	Carbon dioxide excluding biomass	AIR	0.462818	0
2017	ES.CAED/000284000.FACILITY	BARCELONA CARTONBOARD, SAU	BARCELONA CARTONBOARD	6(b)	Industrial plants for the production of paper and board and other primary wood products (such as chipboard, fibreboard and plywood)	1.96776	41.5049	POTASSI (ANTIG. CA.N-II, KM. 592.6)	7	08755	CAN SANTEUGINI	ES	CO2	Carbon dioxide	AIR	0.14245	0.02035
2017	ES.CAED/001600000.FACILITY	GRUPO EMPRESARIAL ENCE S.A.	COMPLEJO INDUSTRIAL DE HUELVA	6(a)	Industrial plants for the production of pulp from timber or similar fibrous materials	-6.86123	37.3101	A-472, KM 79	79	21007	Huelva	ES	CO2	Carbon dioxide	AIR	0.76307	0.10901
2017	ES.CAED/001767000.FACILITY	SMURFIT NAVARRA, S.A.	SMURFIT NAVARRA, S.A.-SANGÜESA	6(b)	Industrial plants for the production of paper and board and other primary wood products (such as chipboard, fibreboard and plywood)	-1.28274	42.591	RAIMUNDO LUMBIER	S/N	31400	SANGUESA	ES	CO2	Carbon dioxide	AIR	0.1925	0.0275
2017	ES.CAED/001960000.FACILITY	PAPELES Y CARTONES DE EUROPA	EUROPAC-DUEÑAS	6(b)	Industrial plants for the production of paper and board and other primary wood products (such as chipboard, fibreboard and plywood)	-4.55944	41.84	INDUSTRIAL 1	113	34210	DUEÑAS	ES	CO2	Carbon dioxide	AIR	0.14861	0.02123
2017	ES.CAED/002761000.FACILITY	SOCIEDAD ANONIMA DE INDUSTRIAS CELULOSA ARAGONESA	SAICA 1	6(b)	Industrial plants for the production of paper and board and other primary wood products (such as chipboard, fibreboard and plywood)	-0.871259	41.6701	SAN JUAN DE LA PEÑA	140	50015	ZARAGOZA	ES	CO2	Carbon dioxide	AIR	0.19096	0.02728
2017	ES.CAED/002762000.FACILITY	SOCIEDAD ANONIMA DE INDUSTRIAS CELULOSA ARAGONESA	SAICA 2	6(b)	Industrial plants for the production of paper and board and other primary wood products (such as chipboard, fibreboard and plywood)	-0.678377	41.5466	EL ESPARTAL. CRTA.CASTELLÓN KM21	KM 21	50730	BURGO DE EBRO (EL)	ES	CO2	Carbon dioxide	AIR	0.16555	0.02365
2017	ES.CAED/003067000.FACILITY	TORRASPAPEL, S.A.	FACTORIA MONTAÑANESA	6(a)	Industrial plants for the production of pulp from timber or similar fibrous materials	-0.825523	41.6938	MONTAÑANA	429	50059	MONTAÑANA	ES	CO2	Carbon dioxide	AIR	0.11473	0.01639
2017	ES.CAED/003378000.FACILITY	CELULOSAS DE ASTURIAS S.A.	CEASA ENCE- FÁBRICA DE NAVIA	6(a)	Industrial plants for the production of pulp from timber or similar fibrous materials	-6.72114	43.5411	ARMENTAL	S/N	33710	NAVIA	ES	CO2	Carbon dioxide	AIR	1.5246	0.2178
2017	ES.CAED/003408000.FACILITY	SMURFIT KAPPA ESPAÑA, SA	FÁBRICA DE MENGÍBAR (SMURFIT KAPPA ESPAÑA, S.A.)	6(b)	Industrial plants for the production of paper and board and other primary wood products (such as chipboard, fibreboard and plywood)	-3.79958	37.9786	BAILÉN-MOTRIL,	S/N	23620	MENGIBAR	ES	CO2	Carbon dioxide	AIR	0.09009	0.01287
2017	ES.CAED/003648000.FACILITY	PAPELERA GUIPUZCOANA DE ZICUÑAGA, S.A.	PAPELERA GUIPUZCOANA DE ZICUÑAGA	6(a)	Industrial plants for the production of pulp from timber or similar fibrous materials	-1.96737	43.2612	ZICUÑAGA	S/N	20120	Hernani	ES	CO2	Carbon dioxide	AIR	0.16863	0.02409
2017	ES.CAED/006119000.FACILITY	SOCIEDAD ANONIMA DE INDUSTRIAS CELULOSA ARAGONESA	SAICA 4	6(b)	Industrial plants for the production of paper and board and other primary wood products (such as chipboard, fibreboard and plywood)	-0.670765	41.5499	EL ESPARTAL. CRTA. CASTELLÓN	KM 21	50015	ZARAGOZA	ES	CO2	Carbon dioxide	AIR	0.16786	0.02398
2017	ES.CAED/006133000.FACILITY	SOCIEDAD ANONIMA DE INDUSTRIAS CELULOSA ARAGONESA	SAICA 3	6(b)	Industrial plants for the production of paper and board and other primary wood products (such as chipboard, fibreboard and plywood)	-0.678377	41.5466	EL ESPARTAL. CRTA. CASTELLÓN, KM21	S/N	50730	BURGO DE EBRO (EL)	ES	CO2	Carbon dioxide	AIR	0.16093	0.02299
2017	ES.CAED/006619000.FACILITY	FINANCIERA MADERERA, S.A.	FINANCIERA MADERERA, S.A. - COGENERACION DEL NOROESTE S.L.	6(b)	Industrial plants for the production of paper and board and other primary wood products (such as chipboard, fibreboard and plywood)	-8.49879	42.9136	CORUÑA-TUY	KM. 57	15884	SANTIAGO DE COMPOSTELA	ES	CO2	Carbon dioxide	AIR	0.10395	0.01485
2017	ES.CAED/007939000.FACILITY	KRONOSPAN MDF S.L.	KRONOSPAN MDF S.L. (SALAS DE LOS INFANTES)	6(b)	Industrial plants for the production of paper and board and other primary wood products (such as chipboard, fibreboard and plywood)	-3.27056	42.0072	SALAS-QUINTANAR DE LA SIERRA	KM. 2,5	09600	SALAS DE LOS INFANTES	ES	CO2	Carbon dioxide	AIR	0.09394	0.01342
2017	ES.CAED/008700000.FACILITY	INDUSTRIAS DEL TABLERO S.A. (INTASA)	INDUSTRIAS DEL TABLERO S.A. (INTASA)	6(b)	Industrial plants for the production of paper and board and other primary wood products (such as chipboard, fibreboard and plywood)	-8.0683	43.5349	A BIDUEIRA	1	15560	BIDUEIRO (O)	ES	CO2	Carbon dioxide	AIR	0.10549	0.01507
2017	FR.CAED/10011.FACILITY	FIBRE EXCELLENCE SAINT-GAUDENS	FIBRE EXCELLENCE SAINT-GAUDENS	6(a)	Industrial plants for the production of pulp from timber or similar fibrous materials	1.28289	45.8814	Rue du Président Saragat		31800	SAINT-GAUDENS	FR	CO2	Carbon dioxide	AIR	0.73612	0.10516
2017	FR.CAED/3601.FACILITY	UNILIN	UNILIN SAS	6(b)	Industrial plants for the production of paper and board and other primary wood products (such as chipboard, fibreboard and plywood)	5.54237	46.2045	ZI CS 40913 BAZEILLES		08209	SEDAN	FR	CO2	Carbon dioxide	AIR	0.23485	0.03355
2017	FR.CAED/3879.FACILITY	CHAPELLE DARBLAY	CHAPELLE DARBLAY	6(a)	Industrial plants for the production of pulp from timber or similar fibrous materials	7.49998	47.8333	BP1 CD3		76530	GRAND-COURONNE	FR	CO2	Carbon dioxide	AIR	0.25333	0.03619
2017	FR.CAED/3911.FACILITY	DA ALIZAY	DA ALIZAY	6(b)	Industrial plants for the production of paper and board and other primary wood products (such as chipboard, fibreboard and plywood)	1.18251	49.3096	Zone industrielle du Clos Pré - BP 4		27460	ALIZAY	FR	CO2	Carbon dioxide	AIR	0.09779	0.01397
2017	FR.CAED/4307.FACILITY	COMPAGNIE FRANCAISE DU PANNEAU	COMPAGNIE FRANCAISE DU PANNEAU	6(b)	Industrial plants for the production of paper and board and other primary wood products (such as chipboard, fibreboard and plywood)	6.306	47.8915	Avenue Jacques Parisot		70800	SAINT-LOUP-SUR-SEMOUSE	FR	CO2	Carbon dioxide	AIR	0.08855	0.01265
2017	FR.CAED/4602.FACILITY	INTERNATIONAL PAPER S.A.	INTERNATIONAL PAPER	6(b)	Industrial plants for the production of paper and board and other primary wood products (such as chipboard, fibreboard and plywood)	0.81611	45.8756	BP 1 Saillat-sur-Vienne		87206	SAILLAT-SUR-VIENNE	FR	CO2	Carbon dioxide	AIR	0.64603	0.09229
2017	FR.CAED/5125.FACILITY	SAICA PAPER CHAMPBLAIN (EX EMIN LEYDIER)	SAICA PAPER CHAMPBLAIN	6(a)	Industrial plants for the production of pulp from timber or similar fibrous materials	0.16428	47.2322	Usine de CHAMPBLAIN 573 Route des Orti		26241	SAINT-VALLIER	FR	CO2	Carbon dioxide	AIR	0.11011	0.01573
2017	FR.CAED/5506.FACILITY	RDM LA ROCHETTE SAS	RDM LA ROCHETTE SAS	6(b)	Industrial plants for the production of paper and board and other primary wood products (such as chipboard, fibreboard and plywood)	7.04672	49.0522	23 Avenue Maurice Franck		73110	ROCHETTE	FR	CO2	Carbon dioxide	AIR	0.1001	0.0143
2017	FR.CAED/662.FACILITY	SMURFIT KAPPA CELLULOSE DU PIN	SMURFIT KAPPA CELLULOSE DU PIN	6(a)	Industrial plants for the production of pulp from timber or similar fibrous materials	1.3878	48.1878	Allée des Fougères Facture		33380	BIGANOS	FR	CO2	Carbon dioxide	AIR	0.74536	0.10648
2017	FR.CAED/7588.FACILITY	FIBRE EXCELLENCE TARASCON	FIBRE EXCELLENCE TARASCON	6(a)	Industrial plants for the production of pulp from timber or similar fibrous materials	-2.29183	48.0728	529, chemin du mas Tessier		13156	TARASCON	FR	CO2	Carbon dioxide	AIR	0.55517	0.07931
2017	FR.CAED/759.FACILITY	GASCOGNE PAPIER	GASCOGNE PAPIER	6(a)	Industrial plants for the production of pulp from timber or similar fibrous materials	2.29349	50.7273	68 Rue de la Papeterie		40201	MIMIZAN	FR	CO2	Carbon dioxide	AIR	0.29414	0.04202
2017	FR.CAED/771.FACILITY	EGGER PANNEAUX ET DÉCORS	EGGER PANNEAUX ET DÉCORS	6(b)	Industrial plants for the production of paper and board and other primary wood products (such as chipboard, fibreboard and plywood)	2.30991	50.9942	Avenue d'Albret BP n°1		40370	RION-DES-LANDES	FR	CO2	Carbon dioxide	AIR	0.0924	0.0132
2017	FR.CAED/788.FACILITY	RAYONIER A.M. TARTAS	RAYONIER A.M. TARTAS SAS	6(a)	Industrial plants for the production of pulp from timber or similar fibrous materials	2.33174	43.2136	1154 Avenue du Général Leclerc		40400	TARTAS	FR	CO2	Carbon dioxide	AIR	0.38885	0.05555
2017	FR.CAED/9528.FACILITY	BLUE PAPER	BLUE PAPER SAS	6(a)	Industrial plants for the production of pulp from timber or similar fibrous materials	7.79649	48.5645	4, rue Charles Friedel CS 30009		67017	STRASBOURG	FR	CO2	Carbon dioxide	AIR	0.11704	0.01672
2017	http://paikkatiedot.fi/so/1002031/pf/ProductionFacility/0000001111.ProductionFacility	Stora Enso Oyj	Stora Enso Oyj, Enocellin tehdas	6(a)	Industrial plants for the production of pulp from timber or similar fibrous materials	30.2252	62.9272	Tehtaantie	2	81280	Uimaharju	FI	CO2EXCLBIOMASS	Carbon dioxide excluding biomass	AIR	1.39929	0.043912
2017	http://paikkatiedot.fi/so/1002031/pf/ProductionFacility/0000001162.ProductionFacility	Stora Enso Oyj	Stora Enso Oyj, Heinolan Flutingtehdas	6(a)	Industrial plants for the production of pulp from timber or similar fibrous materials	26.0816	61.1787	Tampellantie	1	18100	Heinola	FI	CO2EXCLBIOMASS	Carbon dioxide excluding biomass	AIR	0.176	0.1276
2017	http://paikkatiedot.fi/so/1002031/pf/ProductionFacility/0000001254.ProductionFacility	Stora Enso Oyj	Stora Enso Oyj, Imatran tehtaat	6(a)	Industrial plants for the production of pulp from timber or similar fibrous materials	28.8585	61.2491	Kanavaranta	1	55800	Imatra	FI	CO2EXCLBIOMASS	Carbon dioxide excluding biomass	AIR	1.9316	0.1628
2017	http://paikkatiedot.fi/so/1002031/pf/ProductionFacility/0000001269.ProductionFacility	Metsä Fibre Oy	Metsä Fibre Oy, Joutsenon tehdas	6(a)	Industrial plants for the production of pulp from timber or similar fibrous materials	28.4569	61.1309	Haukilahdentie	27	54120	Pulp	FI	CO2EXCLBIOMASS	Carbon dioxide excluding biomass	AIR	1.27846	0.015136
2017	http://paikkatiedot.fi/so/1002031/pf/ProductionFacility/0000001291.ProductionFacility	UPM Communication Papers Oy	UPM Communication Papers Oy , Kaipolan tehdas	6(b)	Industrial plants for the production of paper and board and other primary wood products (such as chipboard, fibreboard and plywood)	25.2384	61.8105	TEHTAANKATU	1	42220	Kaipola	FI	CO2EXCLBIOMASS	Carbon dioxide excluding biomass	AIR	0.166144	0.050336
2017	http://paikkatiedot.fi/so/1002031/pf/ProductionFacility/0000001294.ProductionFacility	UPM Communication Papers Oy, UPM Specialty Papers Oy	UPM Communication Papers Oy, UPM Specialty Papers Oy, Jämsänkosken paperitehdas	6(b)	Industrial plants for the production of paper and board and other primary wood products (such as chipboard, fibreboard and plywood)	25.16	61.9154	Tiilikantie	17	42300	Jämsänkoski	FI	CO2EXCLBIOMASS	Carbon dioxide excluding biomass	AIR	0.183568	0.074272
2017	http://paikkatiedot.fi/so/1002031/pf/ProductionFacility/0000001348.ProductionFacility	Metsä Fibre Oy Kemi	Metsä Fibre Oy Kemi, Puunjalostusteollisuus	6(a)	Industrial plants for the production of pulp from timber or similar fibrous materials	24.5198	65.7558	Päätie	250	94200	Kemi	FI	CO2EXCLBIOMASS	Carbon dioxide excluding biomass	AIR	2.62416	0.11264
2017	http://paikkatiedot.fi/so/1002031/pf/ProductionFacility/0000001349.ProductionFacility	Stora Enso Veitsiluoto Oy	Stora Enso Veitsiluoto Oy, Puunjalostusteollisuus	6(a)	Industrial plants for the production of pulp from timber or similar fibrous materials	24.6216	65.6936	Rivinkarintie b	68	94800	Kemi	FI	CO2EXCLBIOMASS	Carbon dioxide excluding biomass	AIR	0.97768	0.18392
2017	http://paikkatiedot.fi/so/1002031/pf/ProductionFacility/0000001406.ProductionFacility	Kotkamills Oy	Kotkamills Oy, Kotkan tehtaat	6(a)	Industrial plants for the production of pulp from timber or similar fibrous materials	26.9569	60.4658	Gutzeitintie	1	48100	Kotka	FI	CO2EXCLBIOMASS	Carbon dioxide excluding biomass	AIR	0.2332	0.20856
2017	http://paikkatiedot.fi/so/1002031/pf/ProductionFacility/0000001409.ProductionFacility	Stora Enso Oyj	Stora Enso Oyj, Sunilan tehdas	6(a)	Industrial plants for the production of pulp from timber or similar fibrous materials	26.9516	60.491	Sunilantie	1	48900	Sunila	FI	CO2EXCLBIOMASS	Carbon dioxide excluding biomass	AIR	0.726176	0.027984
2017	http://paikkatiedot.fi/so/1002031/pf/ProductionFacility/0000001495.ProductionFacility	Mondi Powerflute Oy	Mondi Powerflute Oy, Puunjalostusteollisuus, Mondi Powerflute Oy	6(b)	Industrial plants for the production of paper and board and other primary wood products (such as chipboard, fibreboard and plywood)	27.7109	62.9448	Selluntie	142	70101	Kuopio	FI	CO2EXCLBIOMASS	Carbon dioxide excluding biomass	AIR	0.179872	0.084128
2017	http://paikkatiedot.fi/so/1002031/pf/ProductionFacility/0000001560.ProductionFacility	UPM-Kymmene Oyj	UPM-Kymmene Oyj, Kymi	6(a)	Industrial plants for the production of pulp from timber or similar fibrous materials	26.6642	60.9112	Selluntie	1	45700	Kuusankoski	FI	CO2EXCLBIOMASS	Carbon dioxide excluding biomass	AIR	1.4388	0.1012
2017	http://paikkatiedot.fi/so/1002031/pf/ProductionFacility/0000001592.ProductionFacility	UPM-Kymmene Oyj	UPM-Kymmene Oyj, Kaukaan tehtaat	6(a)	Industrial plants for the production of pulp from timber or similar fibrous materials	28.249	61.0662	Kaukaantie	16	53200	Lappeenranta	FI	CO2EXCLBIOMASS	Carbon dioxide excluding biomass	AIR	1.72392	0.06248
2017	http://paikkatiedot.fi/so/1002031/pf/ProductionFacility/0000001780.ProductionFacility	STORA ENSO OULU OY	STORA ENSO OULU OY, Oulun tehdas, Oulu	6(b)	Industrial plants for the production of paper and board and other primary wood products (such as chipboard, fibreboard and plywood)	25.4315	65.0055	Paperitehtaantie	1	90100	Oulu	FI	CO2EXCLBIOMASS	Carbon dioxide excluding biomass	AIR	1.04016	0.20944
2017	http://paikkatiedot.fi/so/1002031/pf/ProductionFacility/0000001833.ProductionFacility	UPM KYMMENE OYJ	UPM KYMMENE OYJ, Pietarsaaren tehtaat	6(a)	Industrial plants for the production of pulp from timber or similar fibrous materials	22.7053	63.7031	Luodontie	149	68600	Pietarsaari	FI	CO2	Carbon dioxide	AIR	1.5785	0.2255
2017	http://paikkatiedot.fi/so/1002031/pf/ProductionFacility/0000001919.ProductionFacility	Metsä Fibre Oy	Metsä Fibre Oy, Rauman tehdas	6(a)	Industrial plants for the production of pulp from timber or similar fibrous materials	21.4662	61.1107	PL	165	26101	Rauma	FI	CO2EXCLBIOMASS	Carbon dioxide excluding biomass	AIR	0.97988	0.06732
2017	http://paikkatiedot.fi/so/1002031/pf/ProductionFacility/0000002234.ProductionFacility	Metsä Fibre Oy	Metsä Fibre Oy, Äänekosken sellutehdas	6(a)	Industrial plants for the production of pulp from timber or similar fibrous materials	25.753	62.5906	Sarvelantie	1	44100	Äänekoski	FI	CO2EXCLBIOMASS	Carbon dioxide excluding biomass	AIR	0.513128	0.036872
2017	http://paikkatiedot.fi/so/1002031/pf/ProductionFacility/0000002591.ProductionFacility	Stora Enso Publication Papers Oy Ltd	Stora Enso Publication Papers Oy Ltd, Anjalankosken tehtaat	6(b)	Industrial plants for the production of paper and board and other primary wood products (such as chipboard, fibreboard and plywood)	26.8211	60.708	Ensontie	1	46900	Inkeroinen	FI	CO2EXCLBIOMASS	Carbon dioxide excluding biomass	AIR	0.14168	0.09416
2017	http://paikkatiedot.fi/so/1002031/pf/ProductionFacility/0100252736.ProductionFacility	Metsä Fibre Oy	Metsä Fibre Oy, Äänekosken biotuotetehdas	6(a)	Industrial plants for the production of pulp from timber or similar fibrous materials	25.7499	62.5929	Sarvelantie	1	44100	Äänekoski	FI	CO2EXCLBIOMASS	Carbon dioxide excluding biomass	AIR	0.870285	0.0044352
2017	https://data.ied_registry.omgeving.vlaanderen.be/id/productionfacility/BE.VL.000000503.FACILITY	SAPPI LANAKEN	SAPPI LANAKEN	6(a)	Industrial plants for the production of pulp from timber or similar fibrous materials	5.6415	50.8817	Montaigneweg	2	3620	Lanaken	BE	CO2	Carbon dioxide	AIR	0.13167	0.01881
2017	https://data.ied_registry.omgeving.vlaanderen.be/id/productionfacility/BE.VL.000000687.FACILITY	VPK Paper	VPK Paper	6(a)	Industrial plants for the production of pulp from timber or similar fibrous materials	4.068	51.0156	Oude baan	120	9200	Dendermonde	BE	CO2	Carbon dioxide	AIR	0.1617	0.0231
2017	https://data.ied_registry.omgeving.vlaanderen.be/id/productionfacility/BE.VL.000000714.FACILITY	STORA ENSO LANGERBRUGGE	STORA ENSO LANGERBRUGGE	6(a)	Industrial plants for the production of pulp from timber or similar fibrous materials	3.7337	51.1066	Wondelgemkaai	200	9000	Gent	BE	CO2	Carbon dioxide	AIR	0.50974	0.07282
2017	https://registry.gdi-de.org/id/de.bw.lubw.inspire.pf/pf-450-1479296-00000000	Papierfabrik Palm GmbH & Co.KG	Papierfabrik Palm GmbH & Co.KG	6(b)	Industrial plants for the production of paper and board and other primary wood products (such as chipboard, fibreboard and plywood)	10.1176	48.8239	Neukochen	10	73432	Aalen	DE	CO2	Carbon dioxide	AIR	0.10395	0.01485
2017	https://registry.gdi-de.org/id/de.bw.lubw.inspire.pf/pf-450-2719142-00000000	Stora Enso Maxau GmbH	Stora Enso Maxau GmbH	6(b)	Industrial plants for the production of paper and board and other primary wood products (such as chipboard, fibreboard and plywood)	8.31327	49.0426	Mitscherlichstr.	-	76187	Karlsruhe	DE	CO2EXCLBIOMASS	Carbon dioxide excluding biomass	AIR	0.2992	0.09064
2017	https://registry.gdi-de.org/id/de.bw.lubw.inspire.pf/pf-450-4124448-00000000	Papierfabrik August Koehler SE	Papierfabrik August Koehler SE	6(b)	Industrial plants for the production of paper and board and other primary wood products (such as chipboard, fibreboard and plywood)	8.08623	48.5268	Hauptstrasse 2 -	4	77704	Oberkirch	DE	CO2EXCLBIOMASS	Carbon dioxide excluding biomass	AIR	0.01056	0.12056
2017	https://registry.gdi-de.org/id/de.by.inspire.pf.ied/S00282	UPM GmbH, Werk Schongau	UPM GmbH, Werk Schongau	6(b)	Industrial plants for the production of paper and board and other primary wood products (such as chipboard, fibreboard and plywood)	10.9001	47.8073	Friedrich-Haindl-Str.	10	86956	Schongau	DE	CO2EXCLBIOMASS	Carbon dioxide excluding biomass	AIR	0.08448	0.23672
2017	https://registry.gdi-de.org/id/de.by.inspire.pf.ied/S00552	Pfleiderer Neumarkt GmbH	Pfleiderer Neumarkt GmbH Spanplattenwerk 2 und 3	6(b)	Industrial plants for the production of paper and board and other primary wood products (such as chipboard, fibreboard and plywood)	11.4514	49.2617	Dreichlingerstraße	76	92318	Neumarkt i.d.OPf.	DE	CO2EXCLBIOMASS	Carbon dioxide excluding biomass	AIR	0.353936	0.018304
2017	https://registry.gdi-de.org/id/de.by.inspire.pf.ied/S00894	Sappi Stockstadt GmbH	Sappi Stockstadt GmbH	6(b)	Industrial plants for the production of paper and board and other primary wood products (such as chipboard, fibreboard and plywood)	9.06936	49.9763	Obernburger Str.	1-9	63811	Stockstadt a.Main	DE	CO2EXCLBIOMASS	Carbon dioxide excluding biomass	AIR	0.15576	0.29832
2017	https://registry.gdi-de.org/id/de.by.inspire.pf.ied/S01026	Pfeifer Holz GmbH	Pfeifer Holz GmbH - Werk Unterbernbach	6(b)	Industrial plants for the production of paper and board and other primary wood products (such as chipboard, fibreboard and plywood)	11.1745	48.5284	Mühlenstr.	7	86556	Kühbach	DE	CO2EXCLBIOMASS	Carbon dioxide excluding biomass	AIR	0.12056	0
2017	https://registry.gdi-de.org/id/de.he.0945.DE7.pf.EU_Industrie/50001960	Papierfabrik A. Jass GmbH & Co.KG	Papierfabrik A. Jass GmbH & Co.KG	6(b)	Industrial plants for the production of paper and board and other primary wood products (such as chipboard, fibreboard and plywood)	9.68162	50.5675	Hermann-Muth-Straße	6	36039	Fulda	DE	CO2EXCLBIOMASS	Carbon dioxide excluding biomass	AIR	0.00968	0.14784
2017	https://registry.gdi-de.org/id/de.ni.mu/04247180070	Nordland Papier GmbH	Nordland Papier GmbH Papierfabrik	6(b)	Industrial plants for the production of paper and board and other primary wood products (such as chipboard, fibreboard and plywood)	7.36236	52.9777	Nordlandallee	1	26892	Dörpen	DE	CO2	Carbon dioxide	AIR	0.20251	0.02893
2017	https://registry.gdi-de.org/id/de.ni.mu/06277201660	Smurfit Kappa Hoya Papier und Karton GmbH	Smurfit Kappa Hoya Papier und Karton GmbH	6(b)	Industrial plants for the production of paper and board and other primary wood products (such as chipboard, fibreboard and plywood)	9.1502	52.8114	Von-dem-Bussche-Straße	1	27318	Hoya	DE	CO2	Carbon dioxide	AIR	0.10472	0.01496
2017	https://registry.gdi-de.org/id/de.ni.mu/07244141350	Sappi Alfeld GmbH	Sappi Alfeld GmbH	6(b)	Industrial plants for the production of paper and board and other primary wood products (such as chipboard, fibreboard and plywood)	9.82076	51.986	Mühlenmasch	1	31061	Alfeld	DE	CO2EXCLBIOMASS	Carbon dioxide excluding biomass	AIR	0.16896	0.1056
2017	https://registry.gdi-de.org/id/de.ni.mu/09281337040	Papier- u. Kartonfabrik Varel GmbH & Co. KG	Papier- u. Kartonfabrik Varel GmbH & Co. KG	6(b)	Industrial plants for the production of paper and board and other primary wood products (such as chipboard, fibreboard and plywood)	8.13282	53.4031	Dangaster Str.	38	26316	Varel	DE	CO2	Carbon dioxide	AIR	0.22253	0.03179
2017	https://registry.gdi-de.org/id/de.nw.inspire.pf.bube-eureg/arb-2017-162024-100-0042820	FS Karton GmbH	FS Karton GmbH	6(b)	Industrial plants for the production of paper and board and other primary wood products (such as chipboard, fibreboard and plywood)	6.69212	51.2187	Düsseldorfer Str.	182 - 184	41460	Neuss	DE	CO2	Carbon dioxide	AIR	0.09317	0.01331
2017	https://registry.gdi-de.org/id/de.nw.inspire.pf.bube-eureg/arb-2017-358008-300-0890760	Schoellershammer GmbH & Co. KG	Schoellershammer GmbH & Co. KG	6(b)	Industrial plants for the production of paper and board and other primary wood products (such as chipboard, fibreboard and plywood)	6.48949	50.7765	Kreuzauer Straße	18	52355	Düren	DE	CO2EXCLBIOMASS	Carbon dioxide excluding biomass	AIR	0.0132	0.14696
2017	https://registry.gdi-de.org/id/de.nw.inspire.pf.bube-eureg/arb-2017-366044-300-0079450	Smurfit Kappa Zülpich Papier GmbH	Smurfit Kappa Zülpich Papier GmbH	6(b)	Industrial plants for the production of paper and board and other primary wood products (such as chipboard, fibreboard and plywood)	6.65301	50.7066	Zum Mühlengraben	1	53909	Zülpich	DE	CO2EXCLBIOMASS	Carbon dioxide excluding biomass	AIR	0.01936	0.21384
2017	https://registry.gdi-de.org/id/de.nw.inspire.pf.bube-eureg/arb-2017-378004-300-0261171	Zanders GmbH i. I.	Zanders GmbH i. I.	6(b)	Industrial plants for the production of paper and board and other primary wood products (such as chipboard, fibreboard and plywood)	7.12707	50.9889	An der Gohrsmühle	-	51465	Bergisch Gladbach	DE	CO2	Carbon dioxide	AIR	0.10549	0.01507
2017	https://registry.gdi-de.org/id/de.nw.inspire.pf.bube-eureg/arb-2017-754008-700-0128330	Pfleiderer Holzwerkstoffe GmbH & Co. KG	Pfleiderer Gütersloh GmbH (Werk 2)	6(b)	Industrial plants for the production of paper and board and other primary wood products (such as chipboard, fibreboard and plywood)	8.40002	51.9155	Stadtring Nordhorn	61	33332	Gütersloh	DE	CO2EXCLBIOMASS	Carbon dioxide excluding biomass	AIR	0.153384	0.012936
2017	https://registry.gdi-de.org/id/de.nw.inspire.pf.bube-eureg/arb-2017-958004-900-0001413	R.D.M. Arnsberg GmbH	R.D.M. Arnsberg GmbH	6(b)	Industrial plants for the production of paper and board and other primary wood products (such as chipboard, fibreboard and plywood)	8.07386	51.3911	Hellefelderstr.	51	59821	Arnsberg	DE	CO2	Carbon dioxide	AIR	0.14091	0.02013
2017	https://registry.gdi-de.org/id/de.nw.inspire.pf.bube-eureg/arb-2017-958012-900-0235121	Egger Holzwerkstoffe Brilon GmbH & Co. KG	Egger Holzwerkstoffe Brilon GmbH & Co. KG	6(b)	Industrial plants for the production of paper and board and other primary wood products (such as chipboard, fibreboard and plywood)	8.59807	51.4067	Im Kissen	19	59929	Brilon	DE	CO2EXCLBIOMASS	Carbon dioxide excluding biomass	AIR	0.420552	0.009768
2017	https://registry.gdi-de.org/id/de.rp.inspire.pf.bube-eureg/1000136	Moritz J. Weig GmbH & Co. KG	Moritz J. Weig GmbH & Co. KG	6(b)	Industrial plants for the production of paper and board and other primary wood products (such as chipboard, fibreboard and plywood)	7.22083	50.3136	Polcher Str.	113	56727	Mayen	DE	CO2EXCLBIOMASS	Carbon dioxide excluding biomass	AIR	0.04488	0.19184
2017	https://registry.gdi-de.org/id/de.sn.sax4inspire.pf/80011253	Stora Enso Sachsen GmbH	Stora Enso Sachsen GmbH	6(b)	Industrial plants for the production of paper and board and other primary wood products (such as chipboard, fibreboard and plywood)	12.5913	51.4646	Am Schanzberg	1	04838	Eilenburg	DE	CO2EXCLBIOMASS	Carbon dioxide excluding biomass	AIR	0.03432	0.14256
2017	HU.OKIR/100293428.FACILITY	Swiss Krono Group	Swiss Krono Kft	6(b)	Industrial plants for the production of paper and board and other primary wood products (such as chipboard, fibreboard and plywood)	22.2994	48.1309	Ipar u.	1.	n.a.	Vásárosnamény	HU	CO2	Carbon dioxide	AIR	0.38346	0.05478
2017	IT.CAED/330102006.FACILITY	FANTONI SPA	FANTONI SPA - Divisione Pannelli e Colla	6(b)	Industrial plants for the production of paper and board and other primary wood products (such as chipboard, fibreboard and plywood)	13.0739	46.2325	Via Europa Unita	1	33010	OSOPPO	IT	CO2	Carbon dioxide	AIR	0.09856	0.01408
2017	IT.CAED/330282002.FACILITY	Mosaico srl	Stabilimento di Tolmezzo	6(b)	Industrial plants for the production of paper and board and other primary wood products (such as chipboard, fibreboard and plywood)	13.0169	46.3939	Pier Fortunato Calvi	15	33028	TOLMEZZO	IT	CO2	Carbon dioxide	AIR	0.10934	0.01562
2017	IT.CAED/340112001.FACILITY	BURGO GROUP S.p.A.	STABILIMENTO DI DUINO	6(b)	Industrial plants for the production of paper and board and other primary wood products (such as chipboard, fibreboard and plywood)	13.5831	45.7933	VIA SAN GIOVANNI DI DUINO	24/D	34011	DUINO-AURISINA	IT	CO2	Carbon dioxide	AIR	0.17787	0.02541
2017	IT.CAED/380602001.FACILITY	PROGEST SPA	CARTIERE VILLA LAGARINA SPA	6(b)	Industrial plants for the production of paper and board and other primary wood products (such as chipboard, fibreboard and plywood)	11.0347	45.9197	VIA PESENTI	1	38060	VILLA LAGARINA	IT	CO2	Carbon dioxide	AIR	0.10241	0.01463
2017	IT.CAED/600442001.FACILITY	CONFIDENTIAL	CONFIDENTIAL	6(b)	Industrial plants for the production of paper and board and other primary wood products (such as chipboard, fibreboard and plywood)	12.8986	43.33	CONFIDENTIAL	CONFIDENTIAL	CONFIDENTIAL	CONFIDENTIAL	IT	CO2	Carbon dioxide	AIR	0.08008	0.01144
2017	NL.RIVM/000004301.FACILITY	Smurfit Kappa Group	Smurfit Kappa Roermond Papier BV	6(b)	Industrial plants for the production of paper and board and other primary wood products (such as chipboard, fibreboard and plywood)	6.00251	51.2062	Mijnheerkensweg	18	6041TA	Roermond	NL	CO2EXCLBIOMASS	Carbon dioxide excluding biomass	AIR	0.01408	0.13552
2017	NL.RIVM/000064335.FACILITY	DS Smith Packaging Netherlands BV	DS Smith Paper De Hoop Mill	6(b)	Industrial plants for the production of paper and board and other primary wood products (such as chipboard, fibreboard and plywood)	6.05477	52.0976	Harderwijkerweg	41	6961GH	Eerbeek	NL	CO2EXCLBIOMASS	Carbon dioxide excluding biomass	AIR	0.00352	0.14696
2017	NL.RIVM/000064360.FACILITY	Smurfit Kappa	Parenco B.V.	6(b)	Industrial plants for the production of paper and board and other primary wood products (such as chipboard, fibreboard and plywood)	5.72846	51.97	Veerweg	1	6871AV	Renkum	NL	CO2	Carbon dioxide	AIR	0.17402	0.02486
2017	PL.MŚ/000000138.FACILITY	Arctic Paper Kostrzyn S.A.	Arctic Paper Kostrzyn S.A.	6(b)	Industrial plants for the production of paper and board and other primary wood products (such as chipboard, fibreboard and plywood)	14.6255	52.5946	Fabryczna	1	66-470	Kostrzyn nad Odrą	PL	CO2	Carbon dioxide	AIR	0.11011	0.01573
2017	PL.MŚ/000000212.FACILITY	Kronospan Mielec Sp. z o.o.	Kronospan Mielec Sp. z o.o.	6(b)	Industrial plants for the production of paper and board and other primary wood products (such as chipboard, fibreboard and plywood)	21.4709	50.307	Wojska Polskiego	3	39-300	Mielec	PL	CO2	Carbon dioxide	AIR	0.09394	0.01342
2017	PL.MŚ/000000687.FACILITY	Pfleiderer Prospan S.A.	Pfleiderer Prospan S.A.	6(b)	Industrial plants for the production of paper and board and other primary wood products (such as chipboard, fibreboard and plywood)	18.1786	51.2853	Bolesławiecka	10	98-400	Wieruszów	PL	CO2	Carbon dioxide	AIR	0.10626	0.01518
2017	PL.MŚ/000000894.FACILITY	"Homanit Polska Spółka z Ograniczoną Odpowiedzialnością i Spółka" Spółka Komandytowa	"Homanit Polska Spółka z Ograniczoną Odpowiedzialnością i Spółka" Spółka Komandytowa	6(b)	Industrial plants for the production of paper and board and other primary wood products (such as chipboard, fibreboard and plywood)	15.8715	54.0629	Kołobrzeska	17-19	78-230	Karlino	PL	CO2	Carbon dioxide	AIR	0.11165	0.01595
2017	PL.MŚ/000003637.FACILITY	SW-SOLAR CZARNA WODA SPÓŁKA Z OGRANICZONĄ ODPOWIEDZIALNOŚCIĄ	SW-SOLAR CZARNA WODA SPÓŁKA Z OGRANICZONĄ ODPOWIEDZIALNOŚCIĄ	6(b)	Industrial plants for the production of paper and board and other primary wood products (such as chipboard, fibreboard and plywood)	18.6742	53.5258	PRZEMYSŁOWA	2	64-700	CZARNKÓW	PL	CO2	Carbon dioxide	AIR	0.07777	0.01111
2017	PT.CAED/PT.APA05764382.CI	Europaec Kraft Viana, SA	CI - Europaec	6(a)	Industrial plants for the production of pulp from timber or similar fibrous materials	-8.7124	41.7037	Apartado 550	None	4905-261	DEOCRISTE	PT	CO2	Carbon dioxide	AIR	0.45045	0.06435
2017	PT.CAED/PT.APA05765202.CI	Navigator Pulp Aveiro, S.A.	CI - Navigator Pulp Cacia, S.A.	6(a)	Industrial plants for the production of pulp from timber or similar fibrous materials	-8.58766	40.6846	Rua dos Bombeiros da Celulose		3800-536	Aveiro	PT	CO2	Carbon dioxide	AIR	0.67529	0.09647
2017	PT.CAED/PT.APA05770942.CI	Caima-Industria de Celulose SA	CI - Caima - Indústria de Celulose, S.A.	6(a)	Industrial plants for the production of pulp from timber or similar fibrous materials	-8.33176	39.4716	Rua do Tejo, Constância Sul	None	2250-058	CONSTÂNCIA	PT	CO2	Carbon dioxide	AIR	0.17787	0.02541
2017	PT.CAED/PT.APA05771362.CI	CELTEJO - Empresa de Celulose do Tejo, S. A.	CI - CELTEJO,Empresa de Celulose do Tejo,S.A.	6(a)	Industrial plants for the production of pulp from timber or similar fibrous materials	-7.66979	39.6615	CELTEJO,Empresa de Celulose do Tejo,S.A. VILA VELHA DE RÓDÃO	None	6030-223	VILA VELHA DE RÓDÃO	PT	CO2	Carbon dioxide	AIR	0.35805	0.05115
2017	PT.CAED/PT.APA05774482.CI	Celulose Beira Industrial (Celbi), S.A	CI - Celulose Beira Industrial (Celbi), S.A.	6(a)	Industrial plants for the production of pulp from timber or similar fibrous materials	-8.87359	40.0536	Celulose Beira Industrial (Celbi), S.A. Leirosa	None	3081-853	FIGUEIRA DA FOZ	PT	CO2	Carbon dioxide	AIR	0.8008	0.1144
2017	RO.CAED/102SV0001.FACILITY	SC EGGER Romania SRL	SC EGGER ROMANIA SRL Radauti	6(b)	Industrial plants for the production of paper and board and other primary wood products (such as chipboard, fibreboard and plywood)	25.9757	47.8553	Austriei nr. 2		725400	Radauti	RO	CO2EXCLBIOMASS	Carbon dioxide excluding biomass	AIR	0.115808	0.034672
2017	RO.CAED/119MS0001.FACILITY	KASTAMONU ENTEGRE AGAC SANAYI	SC KASTAMONU ROMANIA SA	6(b)	Industrial plants for the production of paper and board and other primary wood products (such as chipboard, fibreboard and plywood)	24.7335	46.7756	Ierbus nr. 37		545300	Reghin	RO	CO2	Carbon dioxide	AIR	0.07777	0.01111
2017	SE.CAED/10014311.Facility	STORA ENSO PULP AB	Skutskärs Bruk	6(a)	Industrial plants for the production of pulp from timber or similar fibrous materials	17.3898	60.6437	Skutskärs Bruk		814 81	SKUTSKÄR	SE	CO2EXCLBIOMASS	Carbon dioxide excluding biomass	AIR	1.33712	0.0004796
2017	SE.CAED/10015046.Facility	Holmen Paper AB	Bravikens Pappersbruk	6(b)	Industrial plants for the production of paper and board and other primary wood products (such as chipboard, fibreboard and plywood)	16.2615	58.6397	Östra Bravikenvägen 20		601 88	NORRKÖPING	SE	CO2EXCLBIOMASS	Carbon dioxide excluding biomass	AIR	0.100584	0.013816
2017	SE.CAED/10015070.Facility	Fiskeby Board AB	Fiskeby bruk	6(b)	Industrial plants for the production of paper and board and other primary wood products (such as chipboard, fibreboard and plywood)	16.1147	58.5926	Fiskeby bruk		60210	NORRKÖPING	SE	CO2EXCLBIOMASS	Carbon dioxide excluding biomass	AIR	0.066704	0.040656
2017	SE.CAED/10015075.Facility	BillerudKorsnäs Sweden AB	BillerudKorsnäs Sweden AB Skärblacka Bruk	6(a)	Industrial plants for the production of pulp from timber or similar fibrous materials	15.9014	58.5787	Skärblacka Bruk		61710	SKÄRBLACKA	SE	CO2EXCLBIOMASS	Carbon dioxide excluding biomass	AIR	0.870672	0.009328
2017	SE.CAED/10016489.Facility	Södra Skogsägarna Ekonomisk Förening	Södra Cell Mönsterås	6(a)	Industrial plants for the production of pulp from timber or similar fibrous materials	16.5505	57.0915	Södra Cell Mönsterås		383 25	MÖNSTERÅS	SE	CO2EXCLBIOMASS	Carbon dioxide excluding biomass	AIR	1.6683	0.012496
2017	SE.CAED/10017067.Facility	Södra Skogsägarna ekonomisk förening	Södra Cell Mörrum	6(a)	Industrial plants for the production of pulp from timber or similar fibrous materials	14.7647	56.161	Södra Cell Mörrum		37586	MÖRRUM	SE	CO2EXCLBIOMASS	Carbon dioxide excluding biomass	AIR	0.950532	0.008668
2017	SE.CAED/10017446.Facility	Stora Enso Paper AB	STORA ENSO PAPER AB	6(a)	Industrial plants for the production of pulp from timber or similar fibrous materials	14.4798	56.0438	Nymölla		29580	NYMÖLLA	SE	CO2	Carbon dioxide	AIR	0.59906	0.08558
2017	SE.CAED/10018336.Facility	Stora Enso Paper AB	Stora Enso Paper AB	6(a)	Industrial plants for the production of pulp from timber or similar fibrous materials	13.2351	56.9993	Gamla Nissastigen 16		31481	HYLTEBRUK	SE	CO2EXCLBIOMASS	Carbon dioxide excluding biomass	AIR	0.184624	0.008976
2017	SE.CAED/10018676.Facility	Södra Skogsägarna ekonomisk förening	Södra Cell Värö	6(a)	Industrial plants for the production of pulp from timber or similar fibrous materials	12.1719	57.2217	Södra Cell Värö		43286	VÄRÖBACKA	SE	CO2EXCLBIOMASS	Carbon dioxide excluding biomass	AIR	1.34587	0.009328
2017	SE.CAED/10019131.Facility	Ahlstrom Munksjö Paper AB	Munksjö Paper AB Billingsfors	6(a)	Industrial plants for the production of pulp from timber or similar fibrous materials	12.256	58.9878	Se ovan		66641	BILLINGSFORS	SE	CO2EXCLBIOMASS	Carbon dioxide excluding biomass	AIR	0.145552	0.016368
2017	SE.CAED/10020366.Facility	Stora Enso Skoghall AB	Skoghalls Bruk	6(a)	Industrial plants for the production of pulp from timber or similar fibrous materials	13.4383	59.3185	Bruksgatan		66330	SKOGHALL	SE	CO2EXCLBIOMASS	Carbon dioxide excluding biomass	AIR	0.83116	0.04884
2017	SE.CAED/10020389.Facility	BillerudKorsnäs Sweden AB Gruvöns Bruk	Gruvöns bruk	6(a)	Industrial plants for the production of pulp from timber or similar fibrous materials	13.1215	59.3383	Storjohanns väg 4		66428	GRUMS	SE	CO2EXCLBIOMASS	Carbon dioxide excluding biomass	AIR	1.08654	0.013464
2017	SE.CAED/10020499.Facility	Nordic Paper Bäckhammar AB	Bäckhammars Bruk	6(a)	Industrial plants for the production of pulp from timber or similar fibrous materials	14.1812	59.1602	Bäckhammar		68183	KRISTINEHAMN	SE	CO2EXCLBIOMASS	Carbon dioxide excluding biomass	AIR	0.485654	0.0071456
2017	SE.CAED/10020871.Facility	Ahlstrom-Munksjö Aspa Bruk AB	Ahlstrom-Munksjö Aspa Bruk AB	6(a)	Industrial plants for the production of pulp from timber or similar fibrous materials	14.8067	58.7553	Aspabruk		696 80	Aspabruk	SE	CO2EXCLBIOMASS	Carbon dioxide excluding biomass	AIR	0.378048	0.017072
2017	SE.CAED/10020999.Facility	BillerudKorsnäs Skog & Industri AB	BillerudKorsnäs Skog & Industri AB, Frövi	6(a)	Industrial plants for the production of pulp from timber or similar fibrous materials	15.3269	59.4798	Fröviforsvägen		718 80	Frövi	SE	CO2EXCLBIOMASS	Carbon dioxide excluding biomass	AIR	0.624536	0.027544
2017	SE.CAED/10021743.Facility	Stora Enso Paper AB	Stora Enso Paper AB, Kvarnsveden Mill	6(a)	Industrial plants for the production of pulp from timber or similar fibrous materials	15.4209	60.5232	Kvarnsveden Mill		781 83	BORLÄNGE	SE	CO2EXCLBIOMASS	Carbon dioxide excluding biomass	AIR	0.211112	0.010648
2017	SE.CAED/10021814.Facility	STORA ENSO FORS AB	STORA ENSO FORS AB	6(a)	Industrial plants for the production of pulp from timber or similar fibrous materials	16.312	60.2055	Kopparforsvägen 3		774 89	FORS	SE	CO2EXCLBIOMASS	Carbon dioxide excluding biomass	AIR	0.209845	0.0022352
2017	SE.CAED/10022062.Facility	BillerudKorsnäs Skog & Industri Aktiebolag	Korsnäsverken	6(a)	Industrial plants for the production of pulp from timber or similar fibrous materials	17.2675	60.6811	SAKNAS		80641	GÄVLE	SE	CO2EXCLBIOMASS	Carbon dioxide excluding biomass	AIR	1.10431	0.013288
2017	SE.CAED/10022175.Facility	Rottneros AB (PUBL)	Vallviks Bruk	6(a)	Industrial plants for the production of pulp from timber or similar fibrous materials	17.1828	61.1882	Vallviks bruk		826 23	VALLVIK	SE	CO2EXCLBIOMASS	Carbon dioxide excluding biomass	AIR	0.553098	0.0030624
2017	SE.CAED/10022227.Facility	Iggesund Paperboard AB	Iggesunds Bruk	6(a)	Industrial plants for the production of pulp from timber or similar fibrous materials	17.0981	61.6386	Cellulosagatan		82530	IGGESUND	SE	CO2EXCLBIOMASS	Carbon dioxide excluding biomass	AIR	0.75372	0.02156
2017	SE.CAED/10022299.Facility	SCA Graphic Sundsvall AB	SCA Östrands massafabrik	6(a)	Industrial plants for the production of pulp from timber or similar fibrous materials	17.3303	62.4752	Järnvägsgatan 2b		86181	TIMRÅ	SE	CO2EXCLBIOMASS	Carbon dioxide excluding biomass	AIR	1.00153	0.036872
2017	SE.CAED/10022356.Facility	SCA Graphic Sundsvall AB, Ortviken	SCA Ortviken	6(b)	Industrial plants for the production of paper and board and other primary wood products (such as chipboard, fibreboard and plywood)	17.3621	62.395	Killingholmen		85633	SUNDSVALL	SE	CO2EXCLBIOMASS	Carbon dioxide excluding biomass	AIR	0.2728	0.01496
2017	SE.CAED/10022449.Facility	Mondi Dynäs AB	Mondi Dynäs AB	6(a)	Industrial plants for the production of pulp from timber or similar fibrous materials	17.7151	62.9754	Väja		873 81	VÄJA	SE	CO2EXCLBIOMASS	Carbon dioxide excluding biomass	AIR	0.559416	0.014344
2017	SE.CAED/10022490.Facility	Domsjö Fabriker AB	Domsjö Fabriker AB	6(a)	Industrial plants for the production of pulp from timber or similar fibrous materials	18.6958	63.2693	Hörneborgsv 17		89186	Örnsköldsvik	SE	CO2EXCLBIOMASS	Carbon dioxide excluding biomass	AIR	0.471064	0.004136
2017	SE.CAED/10022491.Facility	Metsä Board Sverige AB	Metsä Board Sverige AB, Husums fabr	6(a)	Industrial plants for the production of pulp from timber or similar fibrous materials	19.1617	63.3235	Husum Mill		89680	HUSUM	SE	CO2EXCLBIOMASS	Carbon dioxide excluding biomass	AIR	1.43018	0.057024
2017	SE.CAED/10023612.Facility	SCA Obbola AB	SCA Obbola AB	6(a)	Industrial plants for the production of pulp from timber or similar fibrous materials	20.3211	63.7012	Linjevägen 33		91341	Obbola	SE	CO2EXCLBIOMASS	Carbon dioxide excluding biomass	AIR	0.41316	0.02772
2017	SE.CAED/10024325.Facility	BillerudKorsnäs Sweden AB Karlsborg Bruk	BillerudKorsnäs Karlsborgs AB	6(a)	Industrial plants for the production of pulp from timber or similar fibrous materials	23.2877	65.7919	Strandvägen 3		952 83	Karlsborgsverken	SE	CO2EXCLBIOMASS	Carbon dioxide excluding biomass	AIR	0.750288	0.008272
2017	SE.CAED/10024717.Facility	Smurfit Kappa Kraftliner Piteå AB	Smurfit Kappa Kraftliner Piteå	6(a)	Industrial plants for the production of pulp from timber or similar fibrous materials	21.4404	65.3148	Kolugnsvägen 30		94138	PITEÅ	SE	CO2EXCLBIOMASS	Carbon dioxide excluding biomass	AIR	0.985512	0.008888
2017	SE.CAED/10024718.Facility	SCA Munksund AB	SCA Munksund	6(a)	Industrial plants for the production of pulp from timber or similar fibrous materials	21.5039	65.2723	Munksundsvägen		94143	PITEÅ	SE	CO2EXCLBIOMASS	Carbon dioxide excluding biomass	AIR	0.599808	0.016192
2017	SI.ARSO/000000022.FACILITY	VIPAP VIDEM KRŠKO D.D.	VIPAP VIDEM KRŠKO	6(b)	Industrial plants for the production of paper and board and other primary wood products (such as chipboard, fibreboard and plywood)	15.4919	45.9541	Tovarniška ulica	18	8270	Krško	SI	CO2EXCLBIOMASS	Carbon dioxide excluding biomass	AIR	0.0748	0.09592
2017	UK.CAED/EW_EA-15375.FACILITY	SAICA Paper UK Limited	Partington Paper Mill EPR/ZP3736XH	6(b)	Industrial plants for the production of paper and board and other primary wood products (such as chipboard, fibreboard and plywood)	-2.41937	53.4256	Manchester Road	144	M31 4QN	Greater Manchester	GB	CO2	Carbon dioxide	AIR	0.13167	0.01881
2017	UK.LAED/E375_434.FACILITY	EGGER HOLDINGS LIMITED	EGGER (UK) LIMITED	6(b)	Industrial plants for the production of paper and board and other primary wood products (such as chipboard, fibreboard and plywood)	-2.0874	54.9774	Anick Grange Road	EGGER (UK)	NE46 4JS	Hexham	GB	CO2EXCLBIOMASS	Carbon dioxide excluding biomass	AIR	0.19019	0.02717
2017	UK.SEPA/200000015.Facility	Norbord Europe Limited	Norbord Ltd, Pulp and Board Plant	6(b)	Industrial plants for the production of paper and board and other primary wood products (such as chipboard, fibreboard and plywood)	-3.86979	56.0771	Station Road		FK7 7BQ	Cowie	GB	CO2	Carbon dioxide	AIR	0.23562	0.03366
2017	UK.SEPA/200000160.Facility	Norbord Europe Limited	Morayhill Timber Mill	6(b)	Industrial plants for the production of paper and board and other primary wood products (such as chipboard, fibreboard and plywood)	-4.08473	57.5195	Morayhill, Dalcross, Balloch		IV2 7JQ	Inverness	GB	CO2	Carbon dioxide	AIR	0.09394	0.01342
2017	UK.SEPA/200000176.Facility	UPM-Kymmene (UK) Limited	Caledonian Paper Mill	6(b)	Industrial plants for the production of paper and board and other primary wood products (such as chipboard, fibreboard and plywood)	-4.63957	55.5796	Meadowhead Drive		KA11 5AT	Irvine	GB	CO2	Carbon dioxide	AIR	0.21406	0.03058

## Sheet: Table S2
aggCalculation	aggCode	aggDilutionRates	PE	Lat	Long	aggName	aggNUTS	Biogenic CO2 (Mtons CO2)	Fossil CO2 (Mtons CO2)
Charge moyenne maximale hebdomadaire qui pénètre dans la station d'épuration au cours de l'année, à l'exclusion des situations inhabituelles comme celles qui sont dues à de fortes précipitations + rejets directs sans traitement par déversoirs d'orage	FR030000175056	0	10769095	48.8594	2.34052	PARIS-ZONE CENTRALE	FR101	0.0413749	0.00618146
The method was based on permanent population data (census 2011) supplemented by seasonal population (principally on the basis of accommodation facilities) and wherever applicable industrial contribution. In some cases the above findings were verified with the aid of the number of water meters indicative of the number of households, commercial facilities etc, served and on the basis of appropriate…	EL30000101	0	5200000	37.988	23.7088	ATHINA	EL303	0.0199784	0.0029848
treatment capacity of plant as indication for generated load	ATAG_9-HKA-Simmering		4000000	48.1723	16.4653	Wien (HKA Simmering)	AT130	0.015368	0.002296
C	UKENTH_Agg000014		3040238	51.5152	0.0950622	London (Beckton)	UKI41	0.0116806	0.0017451
stimato	IT12000000000142	1	3005533	41.8983	12.4992	ROMA	ITI43	0.0115473	0.00172518
Calculated the sum of the data of the total wastewater load of the settlements constituting the agglomeration	HU-AGGL-ALD268		2867796	47.4841	19.1087	Budapest - Szennyvizelvezetesi Agglomeracio	HU110	0.0110181	0.00164611
Based on the resident polulation, non-resident population and industrial waste water + seasonal changes	SE_AGGLO_1001		2684500	59.3208	18.045	AGGLO_STOCKHOLM	SE110	0.0103138	0.0015409
Estimated	DEAG_HH4/4 AI 3		2500000	53.5205	9.91561	Hamburg	DE600	0.009605	0.001435
resident population + non resident population + seasonal changes + industrial waste waterresident population	PLMZ001		2491811	52.243	21.004	Warszawa	PL911	0.00957354	0.0014303
Measured and estimated	IEAG_D0034	1	2386076	53.3561	-6.28966	Ringsend	IE061	0.0091673	0.00136961
(PROMEDIO ANUAL CAUDAL TRATADO(M3/D)* PROMEDIO ANUAL DE CONCENTRACIÃ“N DBO5 (MG/L) DEL INFLUENTE) / 60	ES9081940001010	0	2182362	41.4044	2.17187	BESOS	ES511	0.00838463	0.00125268
Calculation (Includes resident population, economic activities, tourism, seasonal changes (connected or not), industries discharging into networks/WWTP (max average weekly loads)), IAS	ROAG_179132	0	2159995	44.4365	26.1009	Bucuresti	RO321	0.0082987	0.00123984
Measured	DEAG_BE03		2023000	52.3852	13.4646	Waßmannsdorf	DE300	0.00777237	0.0011612
C	UKENTH_Agg000113		1980153	51.4597	-0.340201	London (Mogden)	UKI75	0.00760775	0.00113661
popolazione stanziale + popolazione fluttuante + popolazione industriale	IT03160121000230		1955865	45.4753	9.17308	AG01514601_MILANO	ITC4C	0.00751443	0.00112267
C	UKENTH_Agg000052		1937192	51.5068	0.146795	London (Crossness)	UKI51	0.00744269	0.00111195
Stimato	IT01000000000142	0	1931129	45.0677	7.67865	TORINO	ITC11	0.0074194	0.00110847
Measured	DEAG_BE01		1901188	52.5316	13.2317	Ruhleben	DE300	0.00730436	0.00109128
C	UKENMI_Agg000156		1868865	52.5288	-1.75823	BIRMINGHAM & BLACK COUNTRY NO. 1 (MINWORTH)	UKG31	0.00718018	0.00107273
Estimated	DEAG_NW905		1830977	51.5357	6.77614	Emscherkläranlage	DEA1F	0.00703461	0.00105098
Charge moyenne maximale hebdomadaire qui pénètre dans la station d'épuration au cours de l'année, à l'exclusion des situations inhabituelles comme celles qui sont dues à de fortes précipitations + rejets directs sans traitement par déversoirs d'orage	FR060000169123	0	1801964	45.7642	4.82846	LYON-1	FRK26	0.00692315	0.00103433
(PROMEDIO ANUAL CAUDAL TRATADO(M3/D)* PROMEDIO ANUAL DE CONCENTRACIÃ“N DBO5 (MG/L) DEL INFLUENTE) / 60	ES9081690001010	0	1682262	41.6587	2.15575	PRAT DE LLOBREGAT (EL)	ES511	0.00646325	0.000965618
calculated	BGAG68134_00		1530399	42.6979	23.3217	Sofia	BG411	0.00587979	0.000878449
E	CZAG554782-1		1500000	50.0827	14.4691	Praha (zbyvajici mestske casti)	CZ010	0.005763	0.000861
we used the treatment capacity of both plants to calculate the produced load	BE1		1460000	50.841	4.38583	Brussels Region	BEZZZ	0.00560932	0.00083804
Population register data for 2018 + industrial wastewater estimate + estimated non-resident population	FIYKR12_T0001	0	1429000	60.2975	24.9228	Helsingin kt.	FI1B1	0.00549022	0.000820246
il carico generato totale è la somma del carico generato dai residenti, dai fluttuanti e dai produttivi	IT05Q90000001824		1405066	45.531	11.354	VALLE_DEL_CHIAMPO	ITH32	0.00539826	0.000806508
Charge moyenne maximale hebdomadaire qui pénètre dans la station d'épuration au cours de l'année, à l'exclusion des situations inhabituelles comme celles qui sont dues à de fortes précipitations + rejets directs sans traitement par déversoirs d'orage	FR050000233063	0	1373201	44.8442	-0.583829	BORDEAUX	FRI12	0.00527584	0.000788217
Charge moyenne maximale hebdomadaire qui pénètre dans la station d'épuration au cours de l'année, à l'exclusion des situations inhabituelles comme celles qui sont dues à de fortes précipitations + rejets directs sans traitement par déversoirs d'orage	FR060000113055	0	1334908	43.3065	5.44602	MARSEILLE1	FRL04	0.00512872	0.000766237
SEGUN METODO GENERAL	ES13280790001011	0	1246093	40.3119	-3.61664	MADRID I (SUR)	ES300	0.00478749	0.000715257
63	ES16480200001010	0	1211499	43.2654	-2.92211	GRAN BILBAO	ES213	0.00465458	0.0006954
Estimated	DEAG_NW1502		1150304	51.5109	6.98092	Bottrop	DEA31	0.00441947	0.000660274
Estimated	DEAG_NW1805		1144800	50.9937	6.97477	Köln Stammheim	DEA23	0.00439832	0.000657115
resident population + non resident population + seasonal changes + industrial waste waterresident population	PLWL001		1140220	52.4064	16.9353	Poznań	PL415	0.00438073	0.000654486
Estimated	DEAG_HE064120008171		1136000	50.0885	8.61859	Frankfurt am Main / Niederrad/Griesheim	DE712	0.00436451	0.000652064
Treatment capacity of the plants	NO-02-016		1118000	59.8971	10.7464	Oslo	NO01	0.00429536	0.000641732
C	UKENNW_Agg000042		1108577	53.4643	-2.38106	Manchester and Salford (Davyhulme)	UKD34	0.00425915	0.000636323
DS	DK319	0	1100000	55.695	12.6151	KØBENHAVN	DK011	0.0042262	0.0006314
applied weighing factor: combined treated load from connected UWTTP's x 1.013	NLA11014	0	1085919	52.399	4.78625	AMSTERDAM	NL329	0.0041721	0.000623318
resident population + non resident population + seasonal changes + industrial waste waterresident population	PLDO001		1049904	51.1105	17.0375	WROCŁAW	PL514	0.00403373	0.000602645
MEDIDO	ES2502970002010	0	1045528	41.6562	-0.87868	ZARAGOZA.SAN GREGORIO.LA CARTUJA BAJA,MONTAÑANA,SAN JUA	ES243	0.00401692	0.000600133
General calculation scheme	PTAGL075		1025000	38.7151	-9.13251	Lisboa	PT170	0.00393805	0.00058835
Carga anual media	ES10462501014012	0	1018596	39.4362	-0.344905	ALBAL, ALCACER, ALFAFAR, BENETUSSER, BENIPARRELL, BURJASSOT, CATARROJA, LLOCNOU DE LA CORONA, MASSANASSA, MISLATA, PAIPORTA, PICANYA, PICASSENT, SEDAVI, SILLA, VALENCIA	ES523	0.00391345	0.000584674
Ausbaugröße mal durchschnittlicher Auslastungsgrad im Berichtsjahr	DEAG_BYN-K0005		1008000	49.4654	11.0204	Nürnberg I	DE254	0.00387274	0.000578592
Ausbaugröße mal durchschnittlicher Auslastungsgrad im Berichtsjahr	DEAG_BYM-K0002		980539	48.2088	11.6294	München I	DE212	0.00376723	0.000562829
Berechnet	DEAG_HB18-1		958000	53.1159	8.71507	Stadtgemeinde Bremen	DE501	0.00368064	0.000549892
Total agglomeration load=number of inhabitants (national census 2011)+ industry load + turism load (loads from maximum average week)	HRAG_0004008		957301	45.8018	15.9663	Zagreb	HR041	0.00367795	0.000549491
resident population + non resident population + seasonal changes + industrial waste waterresident population	PLLO001		952166	51.7642	19.4478	Łódź	PL713	0.00365822	0.000546543
treatment capacity of plant as indication for generated load	ATAG_4-41003001		950000	48.2366	14.4122	Linz und Umgebung	AT312	0.0036499	0.0005453
Residenti+fluttuanti+reflui industriali in fognatura	IT1982053_01		947534	38.1283	13.3435	PALERMO	ITG12	0.00364043	0.000543885
C	UKWAWA_Agg000026		938277	51.4772	-3.13305	Cardiff	UKL22	0.00360486	0.000538571
C	UKENNE_Agg000031		933912	54.9911	-1.47642	Newcastle (Howdon)	UKC22	0.00358809	0.000536065
Calculation which includes resident population, economic activities, tourism, seasonal changes (connected or not), industries discharging into networks/WWTP (max average weekly loads	ROAG_95079	1	933000	47.1562	27.5936	Iasi	RO213	0.00358459	0.000535542
Based on the resident polulation, non-resident population and industrial waste water + seasonal changes	SE_AGGLO_1002		920000	57.7023	11.9825	AGGLO_GOETEBORG	SE232	0.00353464	0.00052808
General calculation scheme	PTAGL070		920000	38.7559	-9.31915	Costa do Estoril	PT170	0.00353464	0.00052808
resident population + non resident population + seasonal changes + industrial waste waterresident population	PLMP001		913031	50.0587	19.9369	Kraków	PL213	0.00350787	0.00052408
C	UKENTH_Agg000054		911686	51.621	-0.0417892	London (Deephams)	UKI54	0.0035027	0.000523308
The method was based on permanent population data (census 2011) supplemented by seasonal population (principally on the basis of accommodation facilities) and wherever applicable industrial contribution. In some cases the above findings were verified with the aid of the number of water meters indicative of the number of households, commercial facilities etc, served and on the basis of appropriate…	EL12200101	0	900000	40.6417	22.9266	THESSALONIKI	EL522	0.0034578	0.0005166
E	UKENSW_Agg000088		899681	51.5106	-2.6744	Bristol	UKK11	0.00345657	0.000516417
Ausbaugröße mal durchschnittlicher Auslastungsgrad im Berichtsjahr	DEAG_SH56027		891439	53.6031	9.62231	AZV Pinneberg	DEF09	0.00342491	0.000511686
Dati provenienti dalla Città Metropolitana di Genova e dal Gestore del SII	IT07Q13000000001	0	886500	44.4781	8.83825	GENOVA	ITC33	0.00340593	0.000508851
C	UKENTH_Agg000102		872526	51.4679	0.238747	London (Long Reach)	UKJ43	0.00335224	0.00050083
Charge moyenne maximale hebdomadaire qui pénètre dans la station d'épuration au cours de l'année, à l'exclusion des situations inhabituelles comme celles qui sont dues à de fortes précipitations + rejets directs sans traitement par déversoirs d'orage	FR020000167482	0	844238	48.5811	7.74548	STRASBOURG	FRF11	0.00324356	0.000484593
measured	DEAG_BE02		841089	52.6512	13.4223	Schönerlinde	DE300	0.00323146	0.000482785
CARGA DE ENTRADA EN LA EDAR (WWTP) = CARGA GENERADA EN LA AGLOMERACION PORQUE EL 100% DE LA CARGA GENERADA ESTá CONECTADA A LA EDAR	ES15311930001010	0	835444	42.8175	-1.64486	ARAZURI	ES220	0.00320978	0.000479545
Popolazione residente - Abitanti case sparse + Pop. Fluttuante + Carico industriale servito da impianti misti	IT150000000008	0	834347	40.8725	14.1513	NAPOLI_OVEST	ITF33	0.00320556	0.000478915
Metodologia di calcolo: Popolazione residente, presente, pendolare e in strutture alberghiere, abitanti in seconde abitazioni, servizi ristorazione, attività manifatturiere micro, attività manifatturiere medio grandi. Gli agglomerati sono stati individuat	IT160000000061		821394	41.0901	16.8457	BARI	ITF47	0.0031558	0.00047148
Ausbaugröße mal durchschnittlicher Auslastungsgrad im Berichtsjahr	DEAG_BW1115100000001		821146	48.7864	9.20812	Stuttgart	DE126	0.00315484	0.000471338
applied weighing factor: combined treated load from connected UWTTP's x 1.013	NLA15008	0	806452	52.0154	4.31888	DEN HOORN	NL333	0.00309839	0.000462903
resident population + non resident population + seasonal changes + industrial waste waterresident population	PLPM001		766419	54.3516	18.6415	Gdańsk	PL633	0.00294458	0.000439925
C	UKSC_Agg00070		764659	55.9706	-3.142	City of Edinburgh	UKM75	0.00293782	0.000438914
Popolazione residente - Abitanti case sparse + Pop. Fluttuante + Carico industriale servito da impianti misti	IT150000000003	0	755720	40.8497	14.3627	NAPOLI_EST	ITF33	0.00290348	0.000433783
ESTIMADO	ES7471860005010	0	751600	41.6478	-4.72859	VALLADOLID Y SU ALFOZ	ES418	0.00288765	0.000431418
CARACTERIZACION DE VERTIDOS DEL PROYECTO DE CONSTRUCCION	ES7090590001010	0	750000	42.3412	-3.69898	BURGOS Y SU ALFOZ	ES412	0.0028815	0.0004305
ESTIMADO	ES4070400012010	0	750000	39.5789	2.65217	PALMA II	ES533	0.0028815	0.0004305
C	UKENNE_Agg000165		748836	53.7716	-1.47578	LEEDS (KNOSTROP)	UKE42	0.00287703	0.000429832
Ausbaugröße mal durchschnittlicher Auslastungsgrad im Berichtsjahr	DEAG_BYM-K0001		741000	48.292	11.6886	München II - Gut Marienhof	DE21B	0.00284692	0.000425334
Charge moyenne maximale hebdomadaire qui pénètre dans la station d'épuration au cours de l'année, à l'exclusion des situations inhabituelles comme celles qui sont dues à de fortes précipitations + rejets directs sans traitement par déversoirs d'orage	FR050000131555	0	739214	43.6094	1.41949	TOULOUSEZC	FRJ23	0.00284006	0.000424309
Measured at the Malta South and Sant Antnin UWWTPs	MTMS	0	732627	35.8811	14.5551	Malta South	MT001	0.00281475	0.000420528
ESTIMADO	ES1290670005022	0	731782	36.7	-4.51915	MALAGA OESTE (GUADALHORCE)	ES617	0.00281151	0.000420043
Estimated	DEAG_NW1204		713177	51.5377	7.42629	Dortmund-Deusen	DEA52	0.00274003	0.000409364
ESTIMADO	ES1410910002012	0	710488	37.2817	-5.92029	SEVILLA II (COPERO)	ES618	0.00272969	0.00040782
General calculation scheme	LV01004		709797	56.9473	24.1067	Rīga	LV006	0.00272704	0.000407423
BOD5/60*mg/day + population, not connected to collecting system	LT-AG-001		697211	54.7008	25.2965	Vilnius	LT011	0.00267868	0.000400199
popolazione stanziale + popolazione fluttuante + popolazione industriale	IT03160121000237		690789	45.6376	9.25852	AG01514901_MONZA	ITC4D	0.00265401	0.000396513
treatment capacity of plant as indication for generated load	ATAG_5-A1699622R154		680000	47.8597	13.0025	Salzburg (Siggerwiesen)	AT323	0.00261256	0.00039032
Estimated	DEAG_NI253014201		673200	52.4153	9.51037	Gümmerwald	DE929	0.00258643	0.000386417
https://www.ieabioenergy.com/wp-content/uploads/2018/01/2014-Switzerland.pdf			670000	47.3769	8.5417	Zurich		0.00257414	0.00038458
C	UKENMI_Agg000222		656645	52.701	-1.11576	Leicester	UKF22	0.00252283	0.000376914
stima riferita al carico organico dell'impianto	IT090000000074		656000	43.7165	10.777	SANTA_CROCE_SULL_ARNO	ITI17	0.00252035	0.000376544
C	UKENMI_Agg000163		646513	52.9734	-1.03754	Nottingham	UKF16	0.0024839	0.000371098
C	UKENNW_Agg000110		645028	53.4282	-3.0025	LIVERPOOL (SANDON [NORTH LIVERPOOL DOCKS] )	UKD72	0.0024782	0.000370246
stima riferita ai dati ISTAT ATU del 2009 (Abitanti totali Urbani)	IT090000000138		642336	43.7802	11.2423	ZONA_FIRENZE	ITI14	0.00246785	0.000368701
ESTIMADO	ES1180870004012	0	625000	37.1703	-3.59975	GRANADA SUR	ES614	0.00240125	0.00035875
Residenti + Turisti di punta + AE produttivi in fognatura	IT08000000000017	1	606137	44.497	11.3406	BOLOGNA_AREA_METROPOLITANA	ITH55	0.00232878	0.000347923
Residenti+fluttuanti+reflui industriali in fognatura	IT1987015_01		604824	37.4983	15.0749	CATANIA_CONSORTILE	ITG17	0.00232373	0.000347169
Estimated	DEAG_NW2102		604380	51.3808	6.63935	Krefeld	DEA14	0.00232203	0.000346914
Estimated	DEAG_NW601		598217	51.1941	6.73894	Düsseldorf-Süd	DEA11	0.00229835	0.000343377
SEGUN METODO GENERAL	ES13280790001012	0	594266	40.3119	-3.61664	MADRID II (LA CHINA)	ES300	0.00228317	0.000341109
Einwohnerzahl + Einwohnergleichwerte im gemeindl. Gebiet	DEAG_ST151541000001		585222	51.6517	12.3106	Bitterfeld-Wolfen	DEE05	0.00224842	0.000335917
Charge moyenne maximale hebdomadaire qui pénètre dans la station d'épuration au cours de l'année, à l'exclusion des situations inhabituelles comme celles qui sont dues à de fortes précipitations + rejets directs sans traitement par déversoirs d'orage	FR040000144109	0	582585	47.2446	-1.53705	NANTES-1 (NORD-TOUGAS)	FRG01	0.00223829	0.000334404
POBLACION RESIDENTE. POBLACION ESTACIONAL Y CARGA INDUSTRIAL	ES12150300501010	0	581344	43.355	-8.39116	A CORUÑA	ES111	0.00223352	0.000333691
C	UKSC_Agg00052		581220	55.9083	-4.441	Dalmuir	UKM81	0.00223305	0.00033362
Calculation - Includes resident population, economic activities, tourism, seasonal changes (connected or not), industries discharging into networks/WWTP (max average weekly loads)	ROAG_60428	0	580621	44.1756	28.6274	Constanta	RO223	0.00223075	0.000333276
applied weighing factor: combined treated load from connected UWTTP's x 1.013	NLA27003	0	572632	51.4601	5.50582	EINDHOVEN	NL414	0.00220005	0.000328691
Estimated	DEAG_NW35		567239	50.8408	6.44171	Düren	DEA26	0.00217933	0.000325595
Based on the resident polulation, non-resident population and industrial waste water + seasonal changes	SE_AGGLO_1003		564500	55.5962	13.0095	AGGLO_MALMOE	SE224	0.00216881	0.000324023
C	UKSC_Agg00167		563713	55.8674	-4.341	Shieldhall (Renfrew)	UKM82	0.00216579	0.000323571
Ausbaugröße mal durchschnittlicher Auslastungsgrad im Berichtsjahr	DEAG_SN3187		553821	51.3577	12.366	Verdichtungsgebiet Stadt Leipzig	DED51	0.00212778	0.000317893
63	ES16200690005010	0	553000	43.3224	-1.98431	DONOSTIA-SAN SEBASTIAN	ES212	0.00212463	0.000317422
C	UKENNE_Agg000124		552162	53.4194	-1.40578	Sheffield (Blackburn Meadows)	UKE32	0.00212141	0.000316941
ESTIMADO	ES7372740002010	0	550000	40.9696	-5.65971	SALAMANCA Y SU ALFOZ	ES415	0.0021131	0.0003157
resident population + non resident population + seasonal changes + industrial waste waterresident population	PLLE001		547719	51.2477	22.5657	Lublin	PL814	0.00210434	0.000314391
VOL. AGUA RESIDUAL X DBO5 / 60 G O2/DIA	ES5380380130726	0	538526	28.4577	-16.298	La Esperanza - La Laguna Sur - Santa Cruz - Valles	ES709	0.00206902	0.000309114
SEGUN METODO GENERAL	ES13280790001013	0	534615	40.3351	-3.66252	MADRID III (BUTARQUE)	ES300	0.00205399	0.000306869
In Wallonia, the load generated by an inhabitant has been determined at 54 g BOD/day in accordance with a scientific study conducted by CEBEDEAU. So, 1 inhabitant = 0,9 PE. Moreover, the population is determined on the basis of the cadastral reference	BERW06001	0	530000	50.6347	5.5694	LIEGE	BE332	0.00203626	0.00030422
Popolazione residente - Abitanti case sparse + Pop. Fluttuante + Carico industriale servito da impianti misti	IT150000000007	0	525659	40.9754	14.1802	AVERSA	ITF31	0.00201958	0.000301728
Ausbaugröße mal durchschnittlicher Auslastungsgrad im Berichtsjahr	DEAG_BW3165100000008		524561	47.9993	7.83726	Breisgauer Bucht und Freiburg	DE133	0.00201536	0.000301098
Estimated	DEAG_NI201000201		522717	52.3968	9.66148	Herrenhausen	DE929	0.00200828	0.00030004
resident population + non resident population + seasonal changes + industrial waste waterresident population	PLKP002		520685	53.1225	17.999	Bydgoszcz	PL613	0.00200047	0.000298873
ESTIMADO	ES1140210009010	0	520000	37.894	-4.78213	CORDOBA (LA GOLONDRINA)	ES613	0.00199784	0.00029848
Ausbaugröße mal durchschnittlicher Auslastungsgrad im Berichtsjahr	DEAG_BW2125100000014		519247	49.0111	8.39479	Karlsruhe	DE122	0.00199495	0.000298048
Somma della popolazione residente, della popolazione fluttuante (alberghi e seconde case) e degli a.e. industriali stimati in base al numero di addetti ripartiti per tipologia di attività produttiva, secondo il metodo IRSA CNR.	IT20000000000036		518263	39.231	9.12308	CAGLIARI	ITG27	0.00199117	0.000297483
Ausbaugröße mal durchschnittlicher Auslastungsgrad im Berichtsjahr	DEAG_BW2225100000001		517255	49.4814	8.48672	Mannheim	DE126	0.00198729	0.000296904
Charge moyenne maximale hebdomadaire qui pénètre dans la station d'épuration au cours de l'année, à l'exclusion des situations inhabituelles comme celles qui sont dues à de fortes précipitations + rejets directs sans traitement par déversoirs d'orage	FR010000159350	0	516933	50.6254	3.04007	LILLE	FRE11	0.00198606	0.00029672
SEGUN METODO GENERAL	ES13280790001017	0	516168	40.3501	-3.65967	MADRID VIII (GAVIA)	ES300	0.00198312	0.00029628
Residenti + Turisti di punta + AE produttivi in fognatura	IT08000000000156	1	515132	44.0536	12.521	RIMINI_VAL_MARECCHIA_SAN_MARINO	ITH59	0.00197914	0.000295686
C	UKENNE_Agg000162		512879	53.745	-0.23822	Hull	UKE12	0.00197048	0.000294393
Ausbaugröße mal durchschnittlicher Auslastungsgrad im Berichtsjahr	DEAG_BYDON-K0001		500997	48.4126	10.8873	Augsburg	DE271	0.00192483	0.000287572
Treatment capacity of the plant	NO-11-015		500000	58.9176	5.71541	Stavanger/Sandnes	NO04	0.001921	0.000287
treatment capacity of plant as indication for generated load	ATAG_6-M3489301R0		500000	46.9964	15.472	Graz	AT221	0.001921	0.000287
To calculate pollution load from agglomeration, population, industries and other enterprises in this agglomeration, whose waste water is collected through collecting systems have been taken into account. Sewage, that is not collected through the collecting system yet, is also included. Total generated load of waste water discharges from industries that are separate from an urban waste water colle…	EERKA0370010		499573	59.437	24.766	Tallinn ja ümbrus	EE001	0.00191936	0.000286755
Sum of inhabitants and industry contributions expressed in PE60	SKA1020001		498000	48.16	17.11	Bratislava	SK010	0.00191332	0.000285852
C	UKENTH_Agg000106		497752	51.6167	-0.496403	Maple	UKI74	0.00191236	0.00028571
SEGUN METODO GENERAL	ES13280790001014	0	497660	40.4505	-3.74431	MADRID IV (VIVEROS)	ES300	0.00191201	0.000285657
stima riferita al carico organico dell'impianto,agglomerato caratterizzato da forte presenza di carico industriale	IT090000000075		492612	43.688	10.7946	SAN_MINIATO	ITI17	0.00189262	0.000282759
Estimated	DEAG_NW1		484800	50.8085	6.10417	Aachen-Soers	DEA2D	0.0018626	0.000278275
Charge moyenne maximale hebdomadaire qui pénètre dans la station d'épuration au cours de l'année, à l'exclusion des situations inhabituelles comme celles qui sont dues à de fortes précipitations + rejets directs sans traitement par déversoirs d'orage	FR060000138185	0	480151	45.1875	5.72402	GRENOBLE	FRK24	0.00184474	0.000275607
il carico generato totale è la somma del carico generato dai residenti, dai fluttuanti e dai produttivi	IT05Q90000001801		472703	45.475	12.148	MESTRE_MIRESE	ITH35	0.00181612	0.000271332
Estimated	DEAG_HE064120006011		470000	50.0647	8.52375	Frankfurt am Main / Sindlingen	DE712	0.00180574	0.00026978
Charge moyenne maximale hebdomadaire qui pénètre dans la station d'épuration au cours de l'année, à l'exclusion des situations inhabituelles comme celles qui sont dues à de fortes précipitations + rejets directs sans traitement par déversoirs d'orage	FR060000106088	0	466743	43.7094	7.24343	NICE	FRL03	0.00179323	0.00026791
C	UKENMI_Agg000068		464014	52.3603	-1.50804	Coventry	UKG13	0.00178274	0.000266344
DS	DK310	0	463300	55.3981	10.4186	ODENSE	DK031	0.00178	0.000265934
Calculated the sum of the data of the total wastewater load of the settlements constituting the agglomeration	HU-AGGL-AHX344		462777	46.2499	20.1426	Szeged - Szennyvizelvezetesi Agglomeracio	HU333	0.00177799	0.000265634
ESTIMADO	ES4070400015010	0	460000	39.5555	2.77968	PALMA I	ES533	0.00176732	0.00026404
ESTIMADO	ES14300300001000	0	458561	37.9871	-1.12606	MURCIA ESTE	ES620	0.00176179	0.000263214
Charge moyenne maximale hebdomadaire qui pénètre dans la station d'épuration au cours de l'année, à l'exclusion des situations inhabituelles comme celles qui sont dues à de fortes précipitations + rejets directs sans traitement par déversoirs d'orage	FR060000134272	0	456658	43.6152	3.87805	MONTPELLIER	FRJ13	0.00175448	0.000262122
Charge moyenne maximale hebdomadaire qui pénètre dans la station d'épuration au cours de l'année, à l'exclusion des situations inhabituelles comme celles qui sont dues à de fortes précipitations + rejets directs sans traitement par déversoirs d'orage	FR040000163113	0	454732	45.791	3.10896	CLERMONT-FERRAND	FRK14	0.00174708	0.000261016
Ausbaugröße mal durchschnittlicher Auslastungsgrad im Berichtsjahr	DEAG_BYKE-K0020		450300	47.7793	10.2868	Kempten AZV	DE27E	0.00173005	0.000258472
Estimated	DEAG_NW2101		443300	51.2781	6.69058	Düsseldorf-Nord	DEA1D	0.00170316	0.000254454
C	UKENNE_Agg000149		439411	53.8447	-1.71303	Bradford	UKE41	0.00168822	0.000252222
E	CZAG582786		438310	49.1917	16.6032	Brno	CZ064	0.00168399	0.00025159
popolazione stanziale + popolazione fluttuante + popolazione industriale	IT03160121000258		436989	45.5654	9.06576	AG01517001_OLONA_SUD	ITC4C	0.00167891	0.000250832
C	UKENMI_Agg000207		435738	52.9487	-2.18273	STOKE ON TRENT (STRONGFORD)	UKG23	0.00167411	0.000250114
Carga anual media	ES10030140002012	0	435248	38.3351	-0.52361	ALACANT, SANT VICENT DEL RASPEIG	ES521	0.00167222	0.000249832
resident population + non resident population + seasonal changes + industrial waste waterresident population	PLPM002		434362	54.5096	18.5389	Gdynia	PL633	0.00166882	0.000249324
Calculation	ROAG_155252	0	429293	45.7478	21.2248	Timisoara	RO424	0.00164934	0.000246414
DS	DK278	0	429000	55.4885	8.42958	ESBJERG	DK032	0.00164822	0.000246246
Calculated the sum of the data of the total wastewater load of the settlements constituting the agglomeration	HU-AGGL-AHY338		423050	48.0927	20.6994	Miskolc - Szennyvizelvezetesi Agglomeracio	HU311	0.00162536	0.000242831
C	UKENTH_Agg000125		422864	51.5157	0.181997	London (Riverside)	UKI52	0.00162464	0.000242724
SEGUN METODO GENERAL	ES13280790001015	0	420143	40.4513	-3.53745	MADRID V (REJAS)	ES300	0.00161419	0.000241162
DS	DK367	0	420000	55.577	9.7568	Fredericia	DK042	0.00161364	0.00024108
POBLACION RESIDENTE. POBLACION ESTACIONAL Y CARGA INDUSTRIAL	ES12360571403010	0	418686	42.2323	-8.69565	VIGO (LAGARES)	ES114	0.00160859	0.000240326
Estimated	DEAG_NW2104		409000	51.2431	6.4643	Mönchengladbach GWK I	DEA1E	0.00157138	0.000234766
resident population + non resident population + seasonal changes + industrial waste waterresident population	PLZA001		408032	53.4383	14.5431	Szczecin Lewobrzeże	PL424	0.00156766	0.00023421
C	UKENTH_Agg000126		407317	51.7693	0.0166817	Hertford	UKH23	0.00156491	0.0002338
C	UKENTH_Agg000085		407056	51.4013	-0.290706	London (Hogsmill Valley)	UKI63	0.00156391	0.00023365
C	UKENTH_Agg000015		405886	51.3812	-0.140279	London (Beddington)	UKI63	0.00155941	0.000232979
Charge moyenne maximale hebdomadaire qui pénètre dans la station d'épuration au cours de l'année, à l'exclusion des situations inhabituelles comme celles qui sont dues à de fortes précipitations + rejets directs sans traitement par déversoirs d'orage	FR030000151454	0	403638	49.2594	4.04137	REIMS	FRF23	0.00155078	0.000231688
Estimated	DEAG_NI101000201		400000	52.3217	10.4444	Braunschweig	DE911	0.0015368	0.0002296
treatment capacity of plant as indication for generated load	ATAG_7-7101301		400000	47.2637	11.4466	Innsbruck (Innsbruck und Umgebung)	AT332	0.0015368	0.0002296
General calculation scheme	PTAGL060		400000	39.4557	-8.67235	Alcanena	PT16I	0.0015368	0.0002296
Calculation which includes resident population, economic activities, tourism, seasonal changes (connected or not), industries discharging into networks/WWTP (max average weekly loads)	ROAG_40205	0	398604	45.65	25.579	Brasov (Brasov, Sacele, Ghimbav)	RO122	0.00153144	0.000228799
C	UKENNW_Agg000019		396367	53.5383	-2.35532	Bolton	UKD36	0.00152284	0.000227515
calculated	BGAG10135_00		395943	43.2114	27.9111	Varna	BG331	0.00152121	0.000227271
Charge moyenne maximale hebdomadaire qui pénètre dans la station d'épuration au cours de l'année, à l'exclusion des situations inhabituelles comme celles qui sont dues à de fortes précipitations + rejets directs sans traitement par déversoirs d'orage	FR030000195585	0	395156	48.9946	2.384	SARCELLES	FR108	0.00151819	0.00022682
C	UKENNW_Agg000133		391473	53.5985	-2.78461	WIGAN (HOSCAR)	UKD47	0.00150404	0.000224706
resident population + non resident population + seasonal changes + industrial waste waterresident population	PLPL001		389841	53.1342	23.1727	Aglomeracja Białystok	PL841	0.00149777	0.000223769
Estimated	DEAG_NW2138		389233	51.2043	6.72025	Neuss-Ost	DEA1D	0.00149543	0.00022342
Calculation which Includes resident population, economic activities, tourism, seasonal changes (connected or not), industries discharging into networks/WWTP (max average weekly loads)	ROAG_54984	0	388671	46.7715	23.5917	Cluj-Napoca +Floresti(+Luna de Sus)+Savadisla(+Vlaha)+Gilau(+Somesul Rece)+Baciu	RO113	0.00149327	0.000223097
applied weighing factor: combined treated load from connected UWTTP's x 1.013	NLA10009	0	386504	52.1099	5.10797	UTRECHT	NL310	0.00148495	0.000221853
resident population + non resident population + seasonal changes + industrial waste waterresident population	PLMP002		386125	50.0157	20.9865	Tarnów	PL217	0.00148349	0.000221636
Estimated	DEAG_TH8644		385591	51.0401	10.9848	Erfurt /Elxleben / Neudietendorf	DEG01	0.00148144	0.000221329
C	UKENNE_Agg000012		385324	54.6089	-1.13267	Middlesborough	UKC12	0.00148041	0.000221176
Estimated	DEAG_NW608		384167	51.2235	7.10641	Wuppertal-Buchenhofen	DEA1A	0.00147597	0.000220512
Charge moyenne maximale hebdomadaire qui pénètre dans la station d'épuration au cours de l'année, à l'exclusion des situations inhabituelles comme celles qui sont dues à de fortes précipitations + rejets directs sans traitement par déversoirs d'orage	FR020000168224	0	382152	47.742	7.31972	MULHOUSE	FRF12	0.00146823	0.000219355
C	UKENMI_Agg000056		380311	52.8265	-1.60298	Burton	UKG24	0.00146115	0.000218299
treatment capacity of plant as indication for generated load	ATAG_8-Meiningen		380000	47.3085	9.58972	Meiningen (Region Feldkirch)	AT342	0.00145996	0.00021812
calculated	BGAG56784_00		378454	42.1421	24.7415	Plovdiv	BG421	0.00145402	0.000217233
C	UKENSO_Agg000004		374241	50.8442	-0.993621	Portsmouth and Havant	UKJ35	0.00143783	0.000214814
residenti + turisti + industria + altri	IT210000001016		374050	46.5042	11.3142	BOLZANO	ITH10	0.0014371	0.000214705
popolazione stanziale + popolazione fluttuante + popolazione industriale	IT03160121000205		373123	45.6584	8.79678	AG01209001_LONATE_POZZOLO	ITC41	0.00143354	0.000214173
C	UKENNE_Agg000174		370174	53.6756	-1.60655	Dewsbury	UKE45	0.00142221	0.00021248
General calculation scheme	PTAGL111		370000	41.1472	-8.60423	Porto	PT11A	0.00142154	0.00021238
treatment capacity of plant as indication for generated load	ATAG_3-11		370000	48.1346	16.5412	Raum Schwechat (Schwechat-Mannswörth)	AT127	0.00142154	0.00021238
residenti + turisti + industria + altri	IT210000001008		367720	46.673	11.1476	BURGRAVIATO	ITH10	0.00141278	0.000211071
resident population + non resident population + seasonal changes + industrial waste waterresident population	PLSL005		366763	50.2585	19.0201	Katowice	PL22A	0.0014091	0.000210522
63	ES16010590063010	0	366681	42.8485	-2.67351	VITORIA-GASTEIZ	ES211	0.00140879	0.000210475
ESTIMADO	ES1410700001010	0	365883	37.3587	-6.07573	ALJARAFE II	ES618	0.00140572	0.000210017
Ausbaugröße mal durchschnittlicher Auslastungsgrad im Berichtsjahr	DEAG_SN5009		364644	51.0267	13.7352	Vdg. Dresden/Freital	DED2F	0.00140096	0.000209306
Ausbaugröße mal durchschnittlicher Auslastungsgrad im Berichtsjahr	DEAG_SH3000		361942	53.9001	10.6945	Hansestadt Lübeck	DEF03	0.00139058	0.000207755
C	UKNI_AGG00023		360611	54.622	-5.909	Belfast	UKN06	0.00138547	0.000206991
applied weighing factor: combined treated load from connected UWTTP's x 1.013	NLA17061	0	359005	51.896	4.46468	ROTTERDAM	NL33C	0.0013793	0.000206069
Charge moyenne maximale hebdomadaire qui pénètre dans la station d'épuration au cours de l'année, à l'exclusion des situations inhabituelles comme celles qui sont dues à de fortes précipitations + rejets directs sans traitement par déversoirs d'orage	FR020000154395	0	354566	48.6898	6.16824	NANCY	FRF31	0.00136224	0.000203521
Popolazione residente - Abitanti case sparse + Pop. Fluttuante + Carico industriale servito da impianti misti	IT150000000002	0	352191	40.928	14.2805	NAPOLI_NORD	ITF33	0.00135312	0.000202158
il carico generato totale è la somma del carico generato dai residenti, dai fluttuanti e dai produttivi	IT05000000000021		351155	45.454	10.985	VERONA	ITH31	0.00134914	0.000201563
resident population + non resident population + seasonal changes + industrial waste waterresident population	PLMZ002		349959	51.4015	21.1581	Radom	PL921	0.00134454	0.000200876
Somma della popolazione residente, della popolazione fluttuante (alberghi e seconde case) e degli a.e. industriali stimati in base al numero di addetti ripartiti per tipologia di attività produttiva, secondo il metodo IRSA CNR.	IT20000000000150		349141	40.8301	8.37741	PORTO_TORRES	ITG25	0.0013414	0.000200407
Estimated	DEAG_NW906		347152	51.4915	6.72214	Duisburg-Alte Emscher	DEA12	0.00133376	0.000199265
C - Población de derecho + Población estacional + Población asociada sector turístico + Población equivalente asociada al sector industrial	ES3330441901011	1	346815	43.372	-5.835	NORA-NOREÑA	ES120	0.00133246	0.000199072
Charge moyenne maximale hebdomadaire qui pénètre dans la station d'épuration au cours de l'année, à l'exclusion des situations inhabituelles comme celles qui sont dues à de fortes précipitations + rejets directs sans traitement par déversoirs d'orage	FR030000176540	0	346435	49.444	1.0927	ROUEN	FRD22	0.001331	0.000198854
Estimated	DEAG_NW904		343108	51.4438	6.73166	Duisburg-Kasslerfeld	DEA12	0.00131822	0.000196944
Popolazione residente - Abitanti case sparse + Pop. Fluttuante + Carico industriale servito da impianti misti	IT150000000020	0	343016	40.6955	14.8512	SALERNO	ITF35	0.00131787	0.000196891
Popolazione residente - Abitanti case sparse + Pop. Fluttuante + Carico industriale servito da impianti misti	IT150000000006	0	342777	41.0654	14.295	CASERTA	ITF31	0.00131695	0.000196754
VOLUMEN DE AGUA RESIDUAL POR DBO5/60G DE O2/DÍA	ES5350160043010	0	342702	28.0858	-15.4438	LAS PALMAS DE GRAN CANARIA	ES705	0.00131666	0.000196711
Calculation which includes resident population, economic activities, tourism, seasonal changes (connected or not), industries discharging into networks/WWTP (max average weekly loads)	ROAG_69900	1	341899	44.318	23.8109	Craiova	RO411	0.00131358	0.00019625
Estimated	DEAG_HE066110006311		340000	51.3244	9.52372	Kassel / Wolfsanger	DE731	0.00130628	0.00019516
ESTIMADO	ES1180870004011	0	340000	37.1807	-3.65828	GRANADA LOS VADOS	ES614	0.00130628	0.00019516
popolazione stanziale + popolazione fluttuante + popolazione industriale	IT03160121000032	1	339323	45.727	9.70484	AG01602401_BERGAMO	ITC46	0.00130368	0.000194771
Carga anual media	ES10462501014011	0	339241	39.4315	-0.344559	VALENCIA	ES523	0.00130336	0.000194724
Charge moyenne maximale hebdomadaire qui pénètre dans la station d'épuration au cours de l'année, à l'exclusion des situations inhabituelles comme celles qui sont dues à de fortes précipitations + rejets directs sans traitement par déversoirs d'orage	FR100000197416	0	339077	-21.3272	55.4373	SAINT-PIERRE-REUNION	FRY40	0.00130273	0.00019463
Popolazione residente - Abitanti case sparse + Pop. Fluttuante + Carico industriale servito da impianti misti	IT150000000001	0	338902	40.9672	14.3877	AFRAGOLA	ITF33	0.00130206	0.00019453
Population register data for 2018 + industrial wastewater estimate + estimated non-resident population	FIYKR12_T0331	0	337500	61.4792	23.7364	Tampereen kt.	FI197	0.00129667	0.000193725
General calculation scheme	PTAGL049		337200	40.6548	-8.67913	Costa de Aveiro	PT16D	0.00129552	0.000193553
Popolazione residente - Abitanti case sparse + Pop. Fluttuante + Carico industriale servito da impianti misti	IT150000000005	0	335132	40.7333	14.4874	TORRE_DEL_GRECO	ITF35	0.00128758	0.000192366
C	UKSC_Agg00132		332371	55.5879	-4.639	Meadowhead (Prestwick)	UKM93	0.00127697	0.000190781
popolazione stanziale + popolazione fluttuante + popolazione industriale	IT03Q90000000822		331914	45.5086	9.3088	AG01517101_PESCHIERA_BORROMEO	ITC4C	0.00127521	0.000190519
ESTIMADO	ES7240890002010	0	330000	42.6036	-5.57141	MANCOMUNIDAD DE LEÓN Y SU ALFOZ	ES413	0.00126786	0.00018942
applied weighing factor: combined treated load from connected UWTTP's x 1.013	NLA09024	0	328897	51.8485	5.79643	WEURT	NL226	0.00126362	0.000188787
BOD5/60*mg/day + population, not connected to collecting system	LT-AG-002		328790	54.8994	23.923	Kaunas	LT022	0.00126321	0.000188725
Measured and estimated	IEAG_D0033	1	327701	51.8965	-8.46689	Cork city	IE053	0.00125903	0.0001881
In Wallonia, the load generated by an inhabitant has been determined at 54 g BOD/day in accordance with a scientific study conducted by CEBEDEAU. So, 1 inhabitant = 0,9 PE. Moreover, the population is determined on the basis of the cadastral reference	BERW05005	0	327000	50.4228	4.44338	CHARLEROI	BE322	0.00125633	0.000187698
stima riferita al carico organico dell'impianto	IT090000000090		327000	43.7028	10.7483	CASTELFRANCO_DI_SOTTO	ITI17	0.00125633	0.000187698
DS	DK436	0	326000	57.0337	9.9185	AALBORG	DK050	0.00125249	0.000187124
calculated (JAM * Konzentration=t/a)	DEAG_MV03.03.1 wbu1437		325903	54.1042	12.0963	Rostock - Bramow	DE803	0.00125212	0.000187068
applied weighing factor: combined treated load from connected UWTTP's x 1.013	NLA25021	0	324068	51.3994	4.24662	RILLAND BATH	NL342	0.00124507	0.000186015
Estimated	DEAG_HE064140000101		323528	50.0556	8.25293	Wiesbaden / Mitte	DE714	0.00124299	0.000185705
ESTIMADO	ES8130050002010	0	322400	39.3978	-3.17491	ALCAZAR DE SAN JUAN- CAMPO DE CRIPTANA	ES422	0.00123866	0.000185058
La stima del carico generato nell’approvando aggiornamento del Piano di Tutela delle Acque, in termini di Abitanti Equivalenti Urbani, è stata condotta con le stesse modalità utilizzate per la stima del carico generato approvato con DGR 1085/2009 e confer	IT160000000110		322000	40.4622	17.2452	TARANTO	ITF43	0.00123712	0.000184828
C	UKENAN_Agg000107		320777	52.2501	-0.805898	Northampton	UKF24	0.00123243	0.000184126
General calculation scheme	PTAGL131		320200	38.827	-9.14367	Loures/Frielas	PT170	0.00123021	0.000183795
CALCULADO	ES1290690015010	0	320000	36.5155	-4.88233	MARBELLA	ES617	0.00122944	0.00018368
ESTIMADO	ES1410910002014	0	320000	37.5023	-5.96859	SEVILLA IV (SAN JERONIMO)	ES618	0.00122944	0.00018368
C	UKENMI_Agg000074		319815	52.9064	-1.41624	Derby	UKF11	0.00122873	0.000183574
Charge moyenne maximale hebdomadaire qui pénètre dans la station d'épuration au cours de l'année, à l'exclusion des situations inhabituelles comme celles qui sont dues à de fortes précipitations + rejets directs sans traitement par déversoirs d'orage	FR040000172181	0	318127	47.9885	0.200606	LE MANS	FRG04	0.00122224	0.000182605
C	UKSC_Agg00049		317927	55.8338	-4.122	Daldowie (Baillieston)	UKM82	0.00122148	0.00018249
Charge moyenne maximale hebdomadaire qui pénètre dans la station d'épuration au cours de l'année, à l'exclusion des situations inhabituelles comme celles qui sont dues à de fortes précipitations + rejets directs sans traitement par déversoirs d'orage	FR010000159512	0	316317	50.6914	3.18006	ROUBAIX	FRE11	0.00121529	0.000181566
C	UKENAN_Agg000069		315916	52.0558	-0.711977	Milton Keynes	UKJ12	0.00121375	0.000181336
Calculation which includes resident population, economic activities, tourism, seasonal changes (connected or not), industries discharging into networks/WWTP (max average weekly loads	ROAG_75105	0	315000	45.4408	28.0411	Galati	RO224	0.00121023	0.00018081
(PROMEDIO ANUAL CAUDAL TRATADO(M3/D)* PROMEDIO ANUAL DE CONCENTRACIÃ“N DBO5 (MG/L) DEL INFLUENTE) / 60	ES9081250002010	0	314454	41.4836	2.18665	MONTCADA	ES511	0.00120813	0.000180497
applied weighing factor: combined treated load from connected UWTTP's x 1.013	NLA32002	0	308593	51.602	5.06822	TILBURG	NL412	0.00118561	0.000177132
VOL. AGUA RESIDUAL X DBO5 / 60 G O2/DIA	ES5380010131257	0	307400	28.088	-16.7272	Adeje - Arona	ES709	0.00118103	0.000176448
popolazione stanziale + popolazione fluttuante + popolazione industriale	IT03160121000048		306907	45.5435	10.2271	AG01702901_BRESCIA	ITC47	0.00117914	0.000176165
General calculation scheme	PTAGL103		306500	41.4454	-8.29507	Guimaraes	PT119	0.00117757	0.000175931
General calculation scheme	PTAGL105		306000	41.1838	-8.69012	Matosinhos	PT11A	0.00117565	0.000175644
Charge moyenne maximale hebdomadaire qui pénètre dans la station d'épuration au cours de l'année, à l'exclusion des situations inhabituelles comme celles qui sont dues à de fortes précipitations + rejets directs sans traitement par déversoirs d'orage	FR060000183137	0	304069	43.1405	5.93159	TOULON-LA SEYNE-SUR-MER	FRL05	0.00116823	0.000174536
Popolazione residente - Abitanti case sparse + Pop. Fluttuante + Carico industriale servito da impianti misti	IT150000000025	0	304033	40.7852	14.5716	NOCERA_INFERIORE	ITF35	0.00116809	0.000174515
Calculated the sum of the data of the total wastewater load of the settlements constituting the agglomeration	HU-AGGL-AHW520		303205	47.5303	21.6659	Debrecen - Szennyvizelvezetesi Agglomeracio	HU321	0.00116491	0.00017404
Einwohnerzahl + Einwohnergleichwerte im gemeindl. Gebiet	DEAG_ST152021000001		303100	51.5245	11.9207	Halle	DEE02	0.00116451	0.000173979
General calculation scheme ( industry+inhabitants*weighting factor)	SI16481	0	302293	46.0588	14.5111	SI_LJUBLJANA_16481	SI041	0.00116141	0.000173516
DS	DK435	0	301968	56.1402	10.2121	ÅRHUS	DK042	0.00116016	0.00017333
resident population + non resident population + seasonal changes + industrial waste waterresident population	PLSL001		300710	50.2783	19.1336	Sosnowiec	PL22B	0.00115533	0.000172608
Estimated	DEAG_RP102380095		300536	50.0308	8.21699	Mainz	DEB35	0.00115466	0.000172508
General calculation scheme	PTAGL117		300000	41.1015	-8.64807	Gaia/Litoral	PT11A	0.0011526	0.0001722
Treatment capacity of the plant	NO-16-001		300000	63.4003	10.4238	Trondheim	NO06	0.0011526	0.0001722
treatment capacity of plant as indication for generated load	ATAG_2-K1931629		300000	46.6061	14.3337	Klagenfurt (Wörthersee Ost)	AT211	0.0011526	0.0001722
Charge moyenne maximale hebdomadaire qui pénètre dans la station d'épuration au cours de l'année, à l'exclusion des situations inhabituelles comme celles qui sont dues à de fortes précipitations + rejets directs sans traitement par déversoirs d'orage	FR020000157463	0	299590	49.1092	6.20788	METZ	FRF33	0.00115102	0.000171965
Estimated	DEAG_NI352011201		298650	53.8409	8.74068	Cuxhaven	DE932	0.00114741	0.000171425
ESTIMADO	ES1410910002013	0	298609	37.3383	-5.8405	SEVILLA III (LA RANILLA)	ES618	0.00114726	0.000171402
applied weighing factor: combined treated load from connected UWTTP's x 1.013	NLA28003	0	297534	51.506	5.66298	AARLE RIXTEL	NL414	0.00114313	0.000170785
The general calculation scheme, ref NS9426	NO-12-001		297305	60.3597	5.29636	Bergen	NO05	0.00114225	0.000170653
C	UKWAWA_Agg000006		296808	51.5489	-2.96187	Newport	UKL21	0.00114034	0.000170368
C	UKENSO_Agg000126		295932	50.7965	-0.0246176	Brighton	UKJ22	0.00113697	0.000169865
C	UKENNW_Agg000018		294983	53.7595	-2.60109	Blackburn	UKD45	0.00113332	0.00016932
SEGÚN ESQUEMA GENERAL DE CALCULO	ES13280790001018	0	294119	40.2707	-3.73516	PINTO (ARROYO CULEBRO CUENCA MEDIA ALTA)	ES300	0.00113001	0.000168824
C	UKENAN_Agg000200		293988	52.6167	1.36427	Norwich	UKH17	0.0011295	0.000168749
Dato congruente con quanto comunicato alla Commissione Europea nell'ambito della Causa C-565-10	IT18Q90000001565		293636	39.2778	16.2714	Rende	ITF61	0.00112815	0.000168547
applied weighing factor: combined treated load from connected UWTTP's x 1.013	NLA15005	0	292972	52.0886	4.26655	'S-GRAVENHAGE	NL332	0.0011256	0.000168166
il carico generato totale è la somma del carico generato dai residenti, dai fluttuanti e dai produttivi	IT05000000000146		292755	45.399	11.893	PADOVA	ITH36	0.00112476	0.000168041
Berechnet	DEAG_HB60-1		290000	53.5109	8.56225	Stadtgemeinde Bremerhaven	DE502	0.00111418	0.00016646
C	UKSC_Agg00149		289584	57.1322	-2.061	Aberdeen	UKM50	0.00111258	0.000166221
Ausbaugröße mal durchschnittlicher Auslastungsgrad im Berichtsjahr	DEAG_BYR-K0001		288824	49.0062	12.1846	Regensburg	DE238	0.00110966	0.000165785
Charge moyenne maximale hebdomadaire qui pénètre dans la station d'épuration au cours de l'année, à l'exclusion des situations inhabituelles comme celles qui sont dues à de fortes précipitations + rejets directs sans traitement par déversoirs d'orage	FR040000187085	0	287433	45.8318	1.22913	LIMOGES	FRI23	0.00110432	0.000164987
C	UKENNW_Agg000124		287363	53.3772	-2.63221	NORTH WARRINGTON (WARRINGTON NORTH)	UKD61	0.00110405	0.000164946
Estimated	DEAG_RP104020007		285285	49.5544	8.41244	Ludwigshafen	DEB31	0.00109606	0.000163754
Estimated	DEAG_NW3008		285000	52.0081	7.65195	Münster-Hauptkläranlage	DEA33	0.00109497	0.00016359
Ausbaugröße mal durchschnittlicher Auslastungsgrad im Berichtsjahr	DEAG_BYHO-K0002		284955	50.3334	11.9069	KA Hof	DE244	0.0010948	0.000163564
calculated	BGAG51500_00		283962	42.6595	27.7247	Nesebar-Ravda-Slanchev bryag	BG341	0.00109098	0.000162994
resident population + non resident population + seasonal changes + industrial waste waterresident population	PLSL004		281265	50.4836	19.0651	Częstochowa	PL228	0.00108062	0.000161446
Charge moyenne maximale hebdomadaire qui pénètre dans la station d'épuration au cours de l'année, à l'exclusion des situations inhabituelles comme celles qui sont dues à de fortes précipitations + rejets directs sans traitement par déversoirs d'orage	FR040000145234	0	281177	47.8805	1.89962	ORLEANS CHAPELLE-ST-MESMIN	FRB06	0.00108028	0.000161396
C	UKENMI_Agg000180		280805	52.4522	-2.19156	Stourbridge	UKG24	0.00107885	0.000161182
C	UKENNW_Agg000050		280802	53.9103	-3.0199	Fleetwood and Blackpool (Fleetwood Marsh)	UKD44	0.00107884	0.00016118
General calculation scheme	PTAGL306		280000	41.3487	-8.52574	Famalicao/Sto Tirso/Trofa	PT119	0.00107576	0.00016072
treatment capacity of plant as indication for generated load	ATAG_3-47		280000	48.3632	15.7644	Raum St. Pölten (Traismauer-Stollhofen)	AT123	0.00107576	0.00016072
Estimated	DEAG_HE065310050471		279118	50.5741	8.64912	Giessen / Margaretenhütte/Südliche Lahnstrasse	DE721	0.00107237	0.000160214
Based on the resident polulation, non-resident population and industrial waste water + seasonal changes	SE_AGGLO_1006		279000	59.8416	17.6339	AGGLO_UPPSALA	SE121	0.00107192	0.000160146
C	UKENNE_Agg000161		276920	53.6825	-1.72745	Huddersfield	UKE44	0.00106393	0.000158952
ESTIMADO	ES1040130001010	0	276872	36.8469	-2.45508	ALMERIA-BAJO ANDARAX	ES611	0.00106374	0.000158925
ESTIMADO	ES1110200014010	0	274946	36.6943	-6.11704	JEREZ DE LA FRONTERA	ES612	0.00105634	0.000157819
Population register data for 2018 + industrial wastewater estimate + estimated non-resident population	FIYKR12_T0127	0	274900	60.4661	22.2694	Turun kt.	FI1C1	0.00105617	0.000157793
Carga anual media	ES10030310001022	0	274376	38.5495	-0.078903	BENIDORM, FINESTRAT, L'ALFAS DEL PI, LA NUCIA	ES521	0.00105415	0.000157492
Estimated	DEAG_NW1804		273833	50.7573	7.09292	Bonn Salierweg	DEA22	0.00105207	0.00015718
resident population + non resident population + seasonal changes + industrial waste waterresident population	PLOP001		273102	50.6685	17.9224	Opole	PL524	0.00104926	0.000156761
Einwohnerzahl + Einwohnergleichwerte im gemeindl. Gebiet	DEAG_ST153581000001		272570	52.1839	11.7339	Magdeburg, Gerwisch	DEE06	0.00104721	0.000156455
stima riferita al carico organico dell'impianto	IT090000000003		272170	43.8785	11.0841	PRATO	ITI15	0.00104568	0.000156226
Ausbaugröße mal durchschnittlicher Auslastungsgrad im Berichtsjahr	DEAG_BYHO-K0089		271656	49.9575	11.5514	Bayreuth	DE242	0.0010437	0.000155931
treatment capacity of plant as indication for generated load	ATAG_8-Hofsteig		271600	47.4859	9.67653	Hard (Region Hofsteig)	AT342	0.00104349	0.000155898
BOD5/60*mg/day + population, not connected to collecting system	LT-AG-003		271243	55.704	21.1502	Klaipeda	LT023	0.00104212	0.000155693
Calculation (Includes resident population, economic activities, tourism, seasonal changes (connected or not), industries discharging into networks/WWTP (max average weekly loads)), IAS	ROAG_13178	0	270894	44.8542	24.8723	Pitesti	RO311	0.00104077	0.000155493
C	UKENSO_Agg000008		269373	50.8259	-1.19428	FAREHAM AND GOSPORT, HAMBLE, HEDGE END (PEEL COMMON)	UKJ35	0.00103493	0.00015462
resident population + non resident population + seasonal changes + industrial waste waterresident population	PLKP001		269201	53.0127	18.6041	Toruń	PL613	0.00103427	0.000154521
Charge moyenne maximale hebdomadaire qui pénètre dans la station d'épuration au cours de l'année, à l'exclusion des situations inhabituelles comme celles qui sont dues à de fortes précipitations + rejets directs sans traitement par déversoirs d'orage	FR040000137261	0	268809	47.4001	0.702503	TOURS LA RICHE LA GRANGE DAVID	FRB04	0.00103276	0.000154296
Ausbaugröße mal durchschnittlicher Auslastungsgrad im Berichtsjahr	DEAG_BW9775100000220		268656	48.3953	9.97415	Ulm	DE144	0.00103218	0.000154209
Based on the resident polulation, non-resident population and industrial waste water + seasonal changes	SE_AGGLO_1008		267500	56.026	14.1689	AGGLO_KRISTIANSTAD	SE224	0.00102773	0.000153545
Charge moyenne maximale hebdomadaire qui pénètre dans la station d'épuration au cours de l'année, à l'exclusion des situations inhabituelles comme celles qui sont dues à de fortes précipitations + rejets directs sans traitement par déversoirs d'orage	FR030000176351	0	266067	49.4984	0.139585	HAVRE	FRD22	0.00102223	0.000152722
Charge moyenne maximale hebdomadaire qui pénètre dans la station d'épuration au cours de l'année, à l'exclusion des situations inhabituelles comme celles qui sont dues à de fortes précipitations + rejets directs sans traitement par déversoirs d'orage	FR030000114118	0	265418	49.1883	-0.374394	CAEN	FRD11	0.00101974	0.00015235
popolazione stanziale + popolazione fluttuante + popolazione industriale	IT03160121000317		264600	45.5081	8.86894	AG01518401_ROBECCO_SUL_NAVIGLIO	ITC4C	0.00101659	0.00015188
C	UKENNW_Agg000102		261203	53.7449	-2.82468	PRESTON (CLIFTON MARSH)	UKD45	0.00100354	0.000149931
C	UKENSO_Agg000025		261120	51.386	0.627997	Chatham and Gillingham	UKJ41	0.00100322	0.000149883
Calculated the sum of the data of the total wastewater load of the settlements constituting the agglomeration	HU-AGGL-AHY432		260873	47.9385	21.7085	Nyiregyhaza - Szennyvizelvezetesi Agglomeracio	HU323	0.00100227	0.000149741
Ausbaugröße mal durchschnittlicher Auslastungsgrad im Berichtsjahr	DEAG_SN2001		260000	50.8291	12.9129	Verdichtungsgebiet Chemnitz	DED41	0.00099892	0.00014924
treatment capacity of plant as indication for generated load	ATAG_3-449		260000	47.8335	16.2756	Raum Wiener Neustadt (Wiener Neustadt-Lichtenwörth)	AT122	0.00099892	0.00014924
ESTIMADO	ES1290670005020	0	258375	36.723	-4.4358	PEÑON DEL CUERVO	ES617	0.000992677	0.000148307
Ausbaugröße mal durchschnittlicher Auslastungsgrad im Berichtsjahr	DEAG_BW1175100000062		257107	48.6952	9.69308	Göppingen	DE114	0.000987805	0.000147579
Charge moyenne maximale hebdomadaire qui pénètre dans la station d'épuration au cours de l'année, à l'exclusion des situations inhabituelles comme celles qui sont dues à de fortes précipitations + rejets directs sans traitement par déversoirs d'orage	FR040000135238	0	256900	48.1194	-1.67783	RENNES	FRH03	0.00098701	0.000147461
Abitanti residenti censimento 2011 (Proiezione dei dati ISTAT comunali su base sezioni censuarie formanti l'agglomerato) + Fluttuanti (Proiezione dei dati ISTAT comunali su base sezioni censuarie formanti l'agglomerato) + dati A.E. industriali in fognatur	IT06000000000067	0	256882	45.6381	13.788	TRIESTE_MUGGIA	ITH44	0.000986941	0.00014745
Estimated	DEAG_NW2530		255677	51.6743	7.73141	Hamm-West	DEA54	0.000982311	0.000146759
Charge moyenne maximale hebdomadaire qui pénètre dans la station d'épuration au cours de l'année, à l'exclusion des situations inhabituelles comme celles qui sont dues à de fortes précipitations + rejets directs sans traitement par déversoirs d'orage	FR050000112202	0	255030	44.3613	2.56648	RODEZ	FRJ22	0.000979825	0.000146387
treatment capacity of plant as indication for generated load	ATAG_3-119		255000	48.4007	15.6629	Raum Krems (Krems-Weinzierl)	AT124	0.00097971	0.00014637
Charge moyenne maximale hebdomadaire qui pénètre dans la station d'épuration au cours de l'année, à l'exclusion des situations inhabituelles comme celles qui sont dues à de fortes précipitations + rejets directs sans traitement par déversoirs d'orage	FR050000164445	0	254147	43.3267	-0.347374	PAU	FRI15	0.000976433	0.00014588
CALCULADO	ES8020030002010	0	253419	38.9949	-1.86067	ALBACETE	ES421	0.000973636	0.000145463
Charge moyenne maximale hebdomadaire qui pénètre dans la station d'épuration au cours de l'année, à l'exclusion des situations inhabituelles comme celles qui sont dues à de fortes précipitations + rejets directs sans traitement par déversoirs d'orage	FR030000110387	0	252859	48.2958	4.08254	TROYES	FRF22	0.000971484	0.000145141
Popolazione residente - Abitanti case sparse + Pop. Fluttuante + Carico industriale servito da impianti misti	IT150000000004	0	252628	40.9203	14.5589	NOLA	ITF33	0.000970597	0.000145008
General calculation scheme	PTAGL116		252000	41.3461	-8.47567	Santo Tirso	PT11A	0.000968184	0.000144648
Ausbaugröße mal durchschnittlicher Auslastungsgrad im Berichtsjahr	DEAG_BYN-K0002		252000	49.6171	11.0009	Erlangen	DE252	0.000968184	0.000144648
applied weighing factor: combined treated load from connected UWTTP's x 1.013	NLA16010	0	251936	51.9085	4.54195	CAPELLE AD IJSSEL	NL33C	0.000967938	0.000144611
resident population + non resident population + seasonal changes + industrial waste waterresident population	PLSW001		250625	50.8718	20.6308	Aglomeracja Kielce	PL721	0.000962901	0.000143859
ESTIMADO	ES7050190003010	0	250000	40.6588	-4.69023	AVILA	ES411	0.0009605	0.0001435
Based on the resident polulation, non-resident population and industrial waste water + seasonal changes	SE_AGGLO_1005		250000	58.4033	15.6281	AGGLO_LINKOEPING	SE123	0.0009605	0.0001435
Ausbaugröße mal durchschnittlicher Auslastungsgrad im Berichtsjahr	DEAG_BW1215100000017		249725	49.1453	9.18429	Heilbronn	DE117	0.000959443	0.000143342
applied weighing factor: combined treated load from connected UWTTP's x 1.013	NLA27008	0	249400	51.721	5.28345	'S HERTOGENBOSCH	NL413	0.000958195	0.000143156
Estimated	DEAG_NI403000201		247423	53.1434	8.24573	Oldenburg	DE943	0.000950599	0.000142021
applied weighing factor: combined treated load from connected UWTTP's x 1.013	NLA01033	0	247186	53.2483	6.67183	GARMERWOLDE	NL113	0.000949689	0.000141885
Estimado	ES6390750005010	0	247161	43.463	-3.80857	SAN ROMAN	ES130	0.000949593	0.00014187
SEGÚN ESQUEMA GENERAL DE CALCULO	ES13280790001019	0	247033	40.3008	-3.60215	GETAFE (ARROYO CULEBRO CUENCA BAJA)	ES300	0.000949101	0.000141797
Residenti + Turisti di punta + AE produttivi in fognatura	IT08000000000122	1	246830	44.6213	10.9078	MODENA_FORMIGINE_MARANELLO	ITH54	0.000948321	0.00014168
residenti + turisti + industria + altri	IT210000001043		245448	46.4206	11.3511	FOSSA GRANDE DI BRONZOLO	ITH10	0.000943011	0.000140887
applied weighing factor: combined treated load from connected UWTTP's x 1.013	NLA13010	0	245416	52.3966	4.66875	HAARLEM	NL324	0.000942888	0.000140869
#NAME?	BE_F_AG_011	0	245100	51.1728	2.95974	Oostende	BE255	0.000941674	0.000140687
Sum of inhabitants and industry contributions expressed in PE60	SKA8050204		245000	48.71	21.25	Kosice	SK042	0.00094129	0.00014063
E	CZAG554821		244451	49.8359	18.249	Ostrava	CZ080	0.000939181	0.000140315
Total agglomeration load=number of inhabitants (national census 2011)+ industry load + turism load (loads from maximum average week)	HRAG_0001131		244408	43.5313	16.5128	Split-Solin	HR035	0.000939016	0.00014029
Calculated the sum of the data of the total wastewater load of the settlements constituting the agglomeration	HU-AGGL-AHY126		242805	46.9098	19.6802	Kecskemet - Szennyvizelvezetesi Agglomeracio	HU331	0.000932857	0.00013937
C - Población de derecho + Población estacional + Población asociada sector turístico + Población equivalente asociada al sector industrial	ES3330242402020	1	242501	43.59	-5.765	GIJON OESTE	ES120	0.000931689	0.000139196
applied weighing factor: combined treated load from connected UWTTP's x 1.013	NLA25017	0	241188	51.6302	4.70793	BREDA	NL411	0.000926644	0.000138442
C	UKSC_Agg00185		240825	56.5262	-2.647	Tay	UKM71	0.00092525	0.000138234
Based on the resident polulation, non-resident population and industrial waste water + seasonal changes	SE_AGGLO_1016		240000	55.8393	13.3008	AGGLO_ESLOEV	SE224	0.00092208	0.00013776
Estimated	DEAG_HE064110000001		240000	49.8869	8.62617	Darmstadt	DE711	0.00092208	0.00013776
ESTIMADO	ES1210410001010	0	239826	37.2701	-6.93961	HUELVA	ES615	0.000921411	0.00013766
C	UKENMI_Agg000062		239341	52.5201	-1.71583	BIRMINGHAM EAST (COLESHILL)	UKG13	0.000919548	0.000137382
Charge moyenne maximale hebdomadaire qui pénètre dans la station d'épuration au cours de l'année, à l'exclusion des situations inhabituelles comme celles qui sont dues à de fortes précipitations + rejets directs sans traitement par déversoirs d'orage	FR040000129232	0	239085	47.997	-4.09104	QUIMPER	FRH02	0.000918565	0.000137235
Ausbaugröße mal durchschnittlicher Auslastungsgrad im Berichtsjahr	DEAG_BW4365100000025		238961	47.7867	9.61774	Mariatal	DE148	0.000918088	0.000137164
Charge moyenne maximale hebdomadaire qui pénètre dans la station d'épuration au cours de l'année, à l'exclusion des situations inhabituelles comme celles qui sont dues à de fortes précipitations + rejets directs sans traitement par déversoirs d'orage	FR060000173065	0	238490	45.5866	5.90542	CHAMBERY	FRK27	0.000916279	0.000136893
Charge moyenne maximale hebdomadaire qui pénètre dans la station d'épuration au cours de l'année, à l'exclusion des situations inhabituelles comme celles qui sont dues à de fortes précipitations + rejets directs sans traitement par déversoirs d'orage	FR060000121231	0	236994	47.3161	5.0292	DIJON	FRC11	0.000910531	0.000136035
Charge moyenne maximale hebdomadaire qui pénètre dans la station d'épuration au cours de l'année, à l'exclusion des situations inhabituelles comme celles qui sont dues à de fortes précipitations + rejets directs sans traitement par déversoirs d'orage	FR040000149007	0	236400	47.4647	-0.562643	ANGERS	FRG02	0.000908249	0.000135694
resident population + non resident population + seasonal changes + industrial waste waterresident population	PLPM003		236058	54.4647	17.0264	SŁUPSK	PL636	0.000906935	0.000135497
C	UKENAN_Agg000037		235641	52.3073	-0.624958	Wellingborough	UKF25	0.000905333	0.000135258
The calculation of the generated load includes resident population, seasonal population, tourism and industrial waste water.	CY11-Agglo		235000	35.1742	33.3644	Nicosia	CY000	0.00090287	0.00013489
SEGUN ESQUEMA GENERAL DE CALCULO	ES13280050001012	0	234981	40.4692	-3.41417	ALCALA DE HENARES II (OESTE)	ES300	0.000902797	0.000134879
Charge moyenne maximale hebdomadaire qui pénètre dans la station d'épuration au cours de l'année, à l'exclusion des situations inhabituelles comme celles qui sont dues à de fortes précipitations + rejets directs sans traitement par déversoirs d'orage	FR030000177243	0	234263	48.873	2.71216	LAGNY-SUR-MARNE	FR102	0.000900038	0.000134467
calculated	BGAG68850_00		233367	42.4257	25.6346	Stara Zagora	BG344	0.000896596	0.000133953
DATO ANUAL DE EXPLOTACIÓN DE LA ESTACIÓN DEPURADORA DE AGUAS RESIDUALES	ES17260890002010	0	233356	42.4555	-2.44785	BAJO IREGUA	ES230	0.000896554	0.000133946
C	UKSC_Agg00050		232840	55.835	-4.221	Dalmarnock	UKM82	0.000894571	0.00013365
resident population + non resident population + seasonal changes + industrial waste waterresident population	PLSL010		232127	49.8216	19.0512	Bielsko-Biała Komorowice	PL225	0.000891832	0.000133241
#NAME?	BE_F_AG_049	0	232000	51.2083	4.45362	Deurne	BE211	0.000891344	0.000133168
Charge moyenne maximale hebdomadaire qui pénètre dans la station d'épuration au cours de l'année, à l'exclusion des situations inhabituelles comme celles qui sont dues à de fortes précipitations + rejets directs sans traitement par déversoirs d'orage	FR050000164122	0	231060	43.4739	-1.5532	BIARRITZ-BAYONNE-ANGLET	FRI15	0.000887733	0.000132628
Treatment capacity of the plants	NO-06-001		230000	59.7564	10.1342	Drammen	NO03	0.00088366	0.00013202
resident population + non resident population + seasonal changes + industrial waste waterresident population	PLPK001		229761	50.0373	22.004	Rzeszów	PL823	0.000882742	0.000131883
Dati provenienti dalla Provincia di Savona/Gestori/Gestori SII - In corso aggiornamento individuazione agglomerati in base ai criteri di cui alla DGR n. 1154 del 12/12/2016	IT070000000018	0	228651	44.3062	8.41597	SAVONA	ITC32	0.000878477	0.000131246
applied weighing factor: combined treated load from connected UWTTP's x 1.013	NLA30017	0	228132	51.3815	6.15813	VENLO	NL421	0.000876483	0.000130948
Charge moyenne maximale hebdomadaire qui pénètre dans la station d'épuration au cours de l'année, à l'exclusion des situations inhabituelles comme celles qui sont dues à de fortes précipitations + rejets directs sans traitement par déversoirs d'orage	FR060000174010	0	226137	45.8942	6.13473	ANNECY	FRK28	0.000868818	0.000129803
Charge moyenne maximale hebdomadaire qui pénètre dans la station d'épuration au cours de l'année, à l'exclusion des situations inhabituelles comme celles qui sont dues à de fortes précipitations + rejets directs sans traitement par déversoirs d'orage	FR040000142218	0	225877	45.4266	4.41786	SAINT-ETIENNE	FRK25	0.000867819	0.000129653
In Wallonia, the load generated by an inhabitant has been determined at 54 g BOD/day in accordance with a scientific study conducted by CEBEDEAU. So, 1 inhabitant = 0,9 PE. Moreover, the population is determined on the basis of the cadastral reference	BERW05001	0	224000	50.4402	3.87791	MONS	BE323	0.000860608	0.000128576
ESTIMADO	ES1110120001010	0	223580	36.462	-6.23828	CADIZ-SAN FERNANDO	ES612	0.000858994	0.000128335
Charge moyenne maximale hebdomadaire qui pénètre dans la station d'épuration au cours de l'année, à l'exclusion des situations inhabituelles comme celles qui sont dues à de fortes précipitations + rejets directs sans traitement par déversoirs d'orage	FR030000195127	0	222512	49.0399	2.04981	CERGY-PONTOISE	FR108	0.000854891	0.000127722
applied weighing factor: combined treated load from connected UWTTP's x 1.013	NLA28005	0	222488	51.6368	5.52945	HEESWIJK DINTHER	NL413	0.000854799	0.000127708
Stimato	IT01000000000013	0	221423	45.1101	7.28436	COLLEGNO_PIANEZZA	ITC11	0.000850707	0.000127097
resident population + non resident population + seasonal changes + industrial waste waterresident population	PLSL009		220160	50.2963	18.6693	Gliwice	PL229	0.000845855	0.000126372
Based on the resident polulation, non-resident population and industrial waste water + seasonal changes	SE_AGGLO_1004		220000	56.0371	12.7201	AGGLO_HELSINGBORG	SE224	0.00084524	0.00012628
Residenti+fluttuanti+reflui industriali in fognatura	IT1983048_01		220000	38.2081	15.5538	MESSINA	ITG13	0.00084524	0.00012628
C	UKWAWA_Agg000025		219607	51.4194	-3.21195	CARDIFF (WEST) AND BARRY (COG MOORS)	UKL22	0.00084373	0.000126054
C	IS001	0	219127	64.1325	-21.8771	Capital area	IS00	0.000841886	0.000125779
resident population + non resident population + seasonal changes + industrial waste waterresident population	PLZA006		218595	54.1767	15.5767	Kołobrzeg	PL426	0.000839842	0.000125474
Calculation which includes resident population, economic activities, tourism, seasonal changes (connected or not), industries discharging into networks/WWWTP (max average weekly loads)	ROAG_130534	0	218120	44.9336	26.0202	Ploiesti	RO316	0.000838017	0.000125201
Estimated	DEAG_NI355022201		217569	53.2666	10.4235	Lüneburg	DE935	0.0008359	0.000124885
(PROMEDIO ANUAL CAUDAL TRATADO(M3/D)* PROMEDIO ANUAL DE CONCENTRACIÃ“N DBO5 (MG/L) DEL INFLUENTE) / 60	ES9081210001010	0	217551	41.542	2.44401	MATARO	ES511	0.000835831	0.000124874
Charge moyenne maximale hebdomadaire qui pénètre dans la station d'épuration au cours de l'année, à l'exclusion des situations inhabituelles comme celles qui sont dues à de fortes précipitations + rejets directs sans traitement par déversoirs d'orage	FR030000191228	0	216062	48.632	2.43934	EVRY	FR104	0.00083011	0.00012402
C	UKENNE_Agg000028		215457	54.8981	-1.3613	Hendon	UKC23	0.000827786	0.000123672
Ausbaugröße mal durchschnittlicher Auslastungsgrad im Berichtsjahr	DEAG_BW2215100000002		215042	49.405	8.6841	Heidelberg	DE125	0.000826191	0.000123434
stima riferita al carico organico dell'impianto	IT090000000136		214583	43.7348	10.7938	FUCECCHIO	ITI14	0.000824428	0.000123171
C	UKENTH_Agg000139		213691	51.5709	-1.81802	Swindon	UKK14	0.000821001	0.000122659
C	UKENAN_Agg000210		213262	52.5692	-0.201666	Peterborough	UKH11	0.000819353	0.000122412
Calculation which includes resident population, economic activities, tourism, seasonal changes (connected or not), industries discharging into networks/WWTP (max average weekly loads), IAS	ROAG_26564	0	212175	47.0891	21.941	Oradea	RO111	0.000815176	0.000121788
Population register data for 2018 + industrial wastewater estimate + estimated non-resident population	FIYKR12_T0334	0	212000	60.9939	25.6493	Lahden kt.	FI1C3	0.000814504	0.000121688
In Wallonia, the load generated by an inhabitant has been determined at 54 g BOD/day in accordance with a scientific study conducted by CEBEDEAU. So, 1 inhabitant = 0,9 PE. Moreover, the population is determined on the basis of the cadastral reference	BERW05010	0	212000	50.7322	3.24464	MOUSCRON	BE324	0.000814504	0.000121688
calculated	BGAG07079_00		211387	42.5055	27.4563	Burgas	BG341	0.000812149	0.000121336
(PROMEDIO ANUAL CAUDAL TRATADO(M3/D)* PROMEDIO ANUAL DE CONCENTRACIÃ“N DBO5 (MG/L) DEL INFLUENTE) / 60	ES9083010001010	0	211180	41.3294	2.00945	GAVA-VILADECANS	ES511	0.000811354	0.000121217
Residenti+Turisti di punta+AE produttivi in fognatura (Rilevazione diretta presso Comune Anno 2012)	IT18Q90000001739		210637	38.094	15.6523	Reggio Calabria	ITF65	0.000809267	0.000120906
Calculated the sum of the data of the total wastewater load of the settlements constituting the agglomeration	HU-AGGL-AHX347		210595	47.1897	18.4448	Szekesfehervar - Szennyvizelvezetesi Agglomeracio	HU211	0.000809106	0.000120882
C	UKENTH_Agg000133		210491	51.5039	-0.64276	Slough	UKJ11	0.000808706	0.000120822
Estimated	DEAG_NW910		210000	51.4721	6.66511	Moers-Gerdt	DEA12	0.00080682	0.00012054
popolazione stanziale + popolazione fluttuante + popolazione industriale	IT03160121000367		209929	45.5582	9.18643	AG01503201_SEVESO_SUD	ITC4C	0.000806547	0.000120499
Charge moyenne maximale hebdomadaire qui pénètre dans la station d'épuration au cours de l'année, à l'exclusion des situations inhabituelles comme celles qui sont dues à de fortes précipitations + rejets directs sans traitement par déversoirs d'orage	FR010000162427	0	209045	50.4036	2.95183	HENIN-BEAUMONT	FRE12	0.000803151	0.000119992
Charge moyenne maximale hebdomadaire qui pénètre dans la station d'épuration au cours de l'année, à l'exclusion des situations inhabituelles comme celles qui sont dues à de fortes précipitations + rejets directs sans traitement par déversoirs d'orage	FR060000166136	0	208286	42.7047	2.925	PERPIGNAN	FRJ15	0.000800235	0.000119556
Ausbaugröße mal durchschnittlicher Auslastungsgrad im Berichtsjahr	DEAG_BW2315100000061		208128	48.886	8.69127	Pforzheim	DE129	0.000799628	0.000119465
stima riferita ai dati ISTAT ATU del 2009 (Abitanti totali Urbani)	IT090000000109		207760	43.5397	10.3253	LIVORNO	ITI16	0.000798214	0.000119254
Charge moyenne maximale hebdomadaire qui pénètre dans la station d'épuration au cours de l'année, à l'exclusion des situations inhabituelles comme celles qui sont dues à de fortes précipitations + rejets directs sans traitement par déversoirs d'orage	FR060000230189	0	207553	43.8347	4.35165	NIMES	FRJ12	0.000797419	0.000119135
Ausbaugröße mal durchschnittlicher Auslastungsgrad im Berichtsjahr	DEAG_BYAB-K0033		206665	49.7965	9.89428	Würzburg	DE263	0.000794007	0.000118626
applied weighing factor: combined treated load from connected UWTTP's x 1.013	NLA12021	0	206383	52.7328	5.13553	WERVERSHOOF	NL321	0.000792923	0.000118464
Metodologia di calcolo: Popolazione residente, presente, pendolare e in strutture alberghiere, abitanti in seconde abitazioni, servizi ristorazione, attività manifatturiere micro, attività manifatturiere medio grandi. Gli agglomerati sono stati individuat	IT160000000019		206074	41.4575	15.5515	FOGGIA	ITF46	0.000791736	0.000118286
resident population + non resident population + seasonal changes + industrial waste waterresident population	PLWM001		204798	53.7787	20.4798	Olsztyn	PL622	0.000786834	0.000117554
(PROMEDIO ANUAL CAUDAL TRATADO(M3/D)* PROMEDIO ANUAL DE CONCENTRACIÃ“N DBO5 (MG/L) DEL INFLUENTE) / 60	ES9082790004050	0	204717	41.5658	2.01478	TERRASSA	ES511	0.000786523	0.000117508
ESTIMADO	ES7341200001010	0	204543	42.0097	-4.53174	PALENCIA Y SU ALFOZ	ES414	0.000785854	0.000117408
C	UKENTH_Agg000122		204008	51.4309	-0.978659	Reading	UKJ11	0.000783799	0.000117101
ESTIMADO	ES14300160001030	0	203797	37.6077	-0.98591	CARTAGENA	ES620	0.000782988	0.000116979
Estimated	DEAG_NI404000201		203383	52.3027	8.01365	Osnabrück/Eversburg	DE944	0.000781397	0.000116742
applied weighing factor: combined treated load from connected UWTTP's x 1.013	NLA29002	0	203325	51.812	5.48823	OIJEN	NL413	0.000781175	0.000116709
resident population + non resident population + seasonal changes + industrial waste waterresident population	PLSL007		203111	49.6891	19.2036	Żywiec	PL225	0.000780352	0.000116586
applied weighing factor: combined treated load from connected UWTTP's x 1.013	NLA12013	0	201907	52.6945	4.7372	WARMENHUIZEN	NL321	0.000775727	0.000115895
Residenti + Turisti di punta + AE produttivi in fognatura	IT08000000000135	1	201811	44.7975	10.3245	PARMA	ITH52	0.000775358	0.00011584
applied weighing factor: combined treated load from connected UWTTP's x 1.013	NLA05002	0	201400	52.2341	6.84063	ENSCHEDE	NL213	0.000773779	0.000115604
applied weighing factor: combined treated load from connected UWTTP's x 1.013	NLA06005	0	201031	52.3995	5.24615	ALMERE (DE VAART)	NL230	0.000772361	0.000115392
Stimato	IT01000000000003	0	200175	44.6963	7.97958	ALBA_LANGHE_ROERO	ITC16	0.000769072	0.0001149
Residenti+fluttuanti+reflui industriali in fognatura	IT1987029_01		200000	37.5796	15.0237	MISTERBIANCO_CONSORTILE	ITG17	0.0007684	0.0001148
Use of a weighting factor	NO-04-005		200000	60.7972	11.1805	Hamar	NO02	0.0007684	0.0001148
Estimated	DEAG_NW1913		200000	50.7906	7.15156	St. Augustin Menden	DEA2C	0.0007684	0.0001148
treatment capacity of plant as indication for generated load	ATAG_2-K1939997		200000	46.612	13.8771	Villach	AT211	0.0007684	0.0001148
Population register data for 2018 + industrial wastewater estimate + estimated non-resident population	FIYKR12_T0132	0	199800	61.4303	21.9056	Porin kt.	FI196	0.000767632	0.000114685
Charge moyenne maximale hebdomadaire qui pénètre dans la station d'épuration au cours de l'année, à l'exclusion des situations inhabituelles comme celles qui sont dues à de fortes précipitations + rejets directs sans traitement par déversoirs d'orage	FR040000142187	0	199510	46.0476	4.08587	ROANNE	FRK25	0.000766517	0.000114519
resident population + non resident population + seasonal changes + industrial waste waterresident population	PLLO003		199442	52.2322	19.3564	Kutno	PL715	0.000766256	0.00011448
Charge moyenne maximale hebdomadaire qui pénètre dans la station d'épuration au cours de l'année, à l'exclusion des situations inhabituelles comme celles qui sont dues à de fortes précipitations + rejets directs sans traitement par déversoirs d'orage	FR060000126281	0	199154	45.0474	5.05171	ROMANS-SUR-ISERE	FRK23	0.00076515	0.000114314
In Wallonia, the load generated by an inhabitant has been determined at 54 g BOD/day in accordance with a scientific study conducted by CEBEDEAU. So, 1 inhabitant = 0,9 PE. Moreover, the population is determined on the basis of the cadastral reference	BERW05015	0	199000	50.4676	4.19791	LA LOUVIERE	BE325	0.000764558	0.000114226
applied weighing factor: combined treated load from connected UWTTP's x 1.013	NLA30022	0	198921	51.0626	5.83358	SUSTEREN	NL422	0.000764254	0.000114181
SEGUN ESQUEMA GENERAL DE CALCULO	ES13280400001010	0	198848	40.1826	-3.57217	CIEMPOZUELOS (SOTOGUTIERREZ)	ES300	0.000763974	0.000114139
resident population + non resident population + seasonal changes + industrial waste waterresident population	PLLU002		198087	51.9404	15.5143	Zielona Góra	PL432	0.00076105	0.000113702
Estimated	DEAG_NW2516		197830	51.6074	7.53097	Lünen-Sesekemuendung	DEA5C	0.000760063	0.000113554
Stimato	IT01000000000061	0	197594	45.5652	8.13163	COSSATO	ITC13	0.000759156	0.000113419
Calculation which includes resident population, economic activities, tourism, seasonal changes (connected or not), industries discharging into networks/WWTP (max average weekly loads), IAS	ROAG_20304	0	196439	46.5695	26.9142	Bacau	RO211	0.000754719	0.000112756
Calculation which includes resident population, economic activities, tourism, seasonal changes (connected or not), industries discharging into networks/WWTP (max average weekly loads)	ROAG_114328	0	196097	46.5456	24.5595	Targu Mures	RO125	0.000753405	0.00011256
Metodologia di calcolo: Popolazione residente, presente, pendolare e in strutture alberghiere, abitanti in seconde abitazioni, servizi ristorazione, attività manifatturiere micro, attività manifatturiere medio grandi. Gli agglomerati sono stati individuat	IT160000000145		195368	40.3881	18.173	LECCE	ITF45	0.000750604	0.000112141
C	UKENTH_Agg000159		195283	51.7162	-1.21413	Oxford	UKJ14	0.000750277	0.000112092
applied weighing factor: combined treated load from connected UWTTP's x 1.013	NLA10027	0	195221	52.1742	5.34862	AMERSFOORT	NL310	0.000750039	0.000112057
Charge moyenne maximale hebdomadaire qui pénètre dans la station d'épuration au cours de l'année, à l'exclusion des situations inhabituelles comme celles qui sont dues à de fortes précipitations + rejets directs sans traitement par déversoirs d'orage	FR040000244109	0	195159	47.2446	-1.53705	NANTES-2 (SUD-PETITE CALIFORNIE)	FRG01	0.000749801	0.000112021
Estimated	DEAG_NI454032201		195000	52.5245	7.29559	Lingen	DE949	0.00074919	0.00011193
C	UKENNE_Agg000096		194461	53.917	-1.08662	YORK (NABURN)	UKE21	0.000747119	0.000111621
C	UKWAWA_Agg000074		194376	51.62	-3.8943	Swansea	UKL18	0.000746793	0.000111572
Ausbaugröße mal durchschnittlicher Auslastungsgrad im Berichtsjahr	DEAG_BYIN-K0003		194100	48.7612	11.4912	ZV Zentralkläranlage Ingolstadt	DE211	0.000745732	0.000111413
C	UKENNW_Agg000116		194071	53.405	-2.20424	Stockport	UKD35	0.000745621	0.000111397
resident population + non resident population + seasonal changes + industrial waste waterresident population	PLMZ003		193831	52.1623	20.8126	Pruszków	PL913	0.000744699	0.000111259
C	UKENAN_Agg000307		193550	51.556	0.710501	Southend	UKH31	0.000743619	0.000111098
(PROMEDIO ANUAL CAUDAL TRATADO(M3/D)* PROMEDIO ANUAL DE CONCENTRACIÃ“N DBO5 (MG/L) DEL INFLUENTE) / 60	ES9082110001010	0	193223	41.3842	2.04759	SANT FELIU DE LLOBREGAT	ES511	0.000742363	0.00011091
popolazione residente + abitanti seconde case + attività ristoratrici bar+ristoranti + posti letto alberghi+alloggi per turisti + popolazione presente non residente+attività industriali allacciate alla fogna	IT1300000015		193000	42.4472	14.193	PESCARA-SAN GIOVANNI TEATINO - SPOLTORE	ITF13	0.000741506	0.000110782
Estimated	DEAG_NI453004202		192383	52.8468	8.02075	Cloppenburg	DE948	0.000739135	0.000110428
generated load = at least resident population + seasonal changes + industrial waste water connected	LU_AGGL_1_01	1	192038	49.6306	6.13338	Luxembourg	LU000	0.00073781	0.00011023
Ausbaugröße mal durchschnittlicher Auslastungsgrad im Berichtsjahr	DEAG_BW1155100000016		191692	48.6988	9.01131	Böblingen-Sindelfingen	DE112	0.000736481	0.000110031
BOD5/60*mg/day + population, not connected to collecting system	LT-AG-005		191622	55.723	24.3501	Panevezys	LT025	0.000736212	0.000109991
Calculated the sum of the data of the total wastewater load of the settlements constituting the agglomeration	HU-AGGL-AHY504		191447	46.0875	18.2416	Pecs - Szennyvizelvezetesi Agglomeracio	HU231	0.000735539	0.000109891
C	UKENMI_Agg000099		191433	51.8434	-2.27968	Gloucester (Netheridge)	UKK13	0.000735486	0.000109883
Ausbaugröße mal durchschnittlicher Auslastungsgrad im Berichtsjahr	DEAG_BYN-K0003		190800	49.4907	10.9875	Fürth	DE253	0.000733054	0.000109519
Charge moyenne maximale hebdomadaire qui pénètre dans la station d'épuration au cours de l'année, à l'exclusion des situations inhabituelles comme celles qui sont dues à de fortes précipitations + rejets directs sans traitement par déversoirs d'orage	FR020000168066	0	190543	48.0864	7.35526	COLMAR	FRF12	0.000732066	0.000109372
C - Población de derecho + Población estacional + Población asociada sector turístico + Población equivalente asociada al sector industrial	ES3330040101010	1	190391	43.553	-5.909	AVILES	ES120	0.000731482	0.000109284
C	UKENNW_Agg000026		189764	53.5665	-2.30286	Bury	UKD37	0.000729073	0.000108925
VOL. AGUA RESIDUAL X DBO5 / 60 G O2/DIA	ES5380280130308	0	189682	28.3999	-16.5512	Valle de La Orotava	ES709	0.000728758	0.000108877
Carga anual media	ES10030650002001	0	188913	38.2435	-0.704526	ELX (ALGOROS)	ES521	0.000725804	0.000108436
popolazione stanziale + popolazione fluttuante + popolazione industriale	IT03160122000391		188878	45.5443	9.40834	AG01522401_TRUCCAZZANO	ITC4C	0.000725669	0.000108416
ESTIMADO	ES14300270011011	0	188800	38.068	-1.21385	MOLINA DE SEGURA NORTE	ES620	0.00072537	0.000108371
Estimated	DEAG_NW2105		188750	51.8264	6.27238	Emmerich	DEA1B	0.000725177	0.000108342
DS	DK378	0	188000	56.359	8.59852	HOLSTEBRO	DK041	0.000722296	0.000107912
applied weighing factor: combined treated load from connected UWTTP's x 1.013	NLA08011	0	187979	52.3578	5.6311	HARDERWIJK	NL221	0.000722215	0.0001079
C	UKENNW_Agg000103		187840	53.6091	-2.1785	Rochdale	UKD37	0.000721681	0.00010782
E	CZAG563889		187089	50.7526	15.0554	Liberec	CZ051	0.000718796	0.000107389
SEGUN ESQUEMA GENERAL DE CALCULO	ES13280920001010	0	185964	40.3291	-3.89504	MOSTOLES I (ARROYO DEL SOTO)	ES300	0.000714474	0.000106743
Estimated	DEAG_NW1206		185419	51.3991	7.41642	Hagen Vorhalle	DEA53	0.00071238	0.000106431
il carico generato totale è la somma del carico generato dai residenti, dai fluttuanti e dai produttivi	IT05000000000047		185023	45.546	11.528	VICENZA	ITH32	0.000710858	0.000106203
#NAME?	BE_F_AG_013	0	185000	51.2167	3.21245	Brugge	BE251	0.00071077	0.00010619
Based on the resident polulation, non-resident population and industrial waste water + seasonal changes	SE_AGGLO_1009		185000	58.5867	16.1804	AGGLO_NORRKOEPING	SE123	0.00071077	0.00010619
Estimated	DEAG_TH8652		184864	50.9575	11.6341	Jena	DEG03	0.000710247	0.000106112
C	UKENTH_Agg000100		184812	51.5747	-0.73575	Little Marlow	UKJ13	0.000710048	0.000106082
Stimato	IT01000000000101	0	184763	45.4414	8.63208	NOVARA	ITC15	0.000709859	0.000106054
Carga anual media	ES10120400001010	0	184582	39.9863	-0.004778	CASTELLÓN DE LA PLANA,BENICÀSSIM	ES522	0.000709164	0.00010595
Charge moyenne maximale hebdomadaire qui pénètre dans la station d'épuration au cours de l'année, à l'exclusion des situations inhabituelles comme celles qui sont dues à de fortes précipitations + rejets directs sans traitement par déversoirs d'orage	FR060000106079	0	184452	43.5549	7.00192	CANNES	FRL03	0.000708665	0.000105875
Calculation which includes resident population, economic activities, tourism, seasonal changes (connected or not), industries discharging into networks/WWWTP (max average weekly loads)	ROAG_42682	0	184285	45.2776	27.9573	Braila	RO221	0.000708023	0.00010578
Ausbaugröße mal durchschnittlicher Auslastungsgrad im Berichtsjahr	DEAG_BB239		182862	52.377	13.2482	Stahnsdorf	DE40E	0.000702556	0.000104963
C	UKENNW_Agg000017		182337	53.398	-3.01031	BIRKENHEAD AND WALLASEY (BIRKENHEAD)	UKD74	0.000700539	0.000104661
resident population + non resident population + seasonal changes + industrial waste waterresident population	PLSL011		181697	50.3504	18.9119	Bytom	PL228	0.00069808	0.000104294
Ausbaugröße mal durchschnittlicher Auslastungsgrad im Berichtsjahr	DEAG_BYAB-K0002		180600	49.9784	9.11064	Aschaffenburg	DE261	0.000693865	0.000103664
The general calculation scheme, ref NS9426	NO-01-004		180170	59.209	10.9851	Fredrikstad/Sarpsborg	NO03	0.000692213	0.000103418
The method was based on permanent population data (census 2011) supplemented by seasonal population (principally on the basis of accommodation facilities) and wherever applicable industrial contribution. In some cases the above findings were verified with the aid of the number of water meters indicative of the number of households, commercial facilities etc, served and on the basis of appropriate…	EL23200101	0	180000	38.2389	21.7422	PATRA	EL632	0.00069156	0.00010332
E	UKENSW_Agg000148		179997	50.7443	-1.9916	Poole	UKK21	0.000691548	0.000103318
resident population + non resident population + seasonal changes + industrial waste waterresident population	PLZA002		179402	54.1909	16.1812	Koszalin	PL426	0.000689262	0.000102977
resident population + non resident population + seasonal changes + industrial waste waterresident population	PLSL006		179393	50.3084	18.8027	Zabrze	PL229	0.000689228	0.000102972
Estimated	DEAG_RP102430091		179358	49.6745	8.35195	Worms	DEB39	0.000689093	0.000102951
Estimated	DEAG_NW1201		179286	51.448	7.29063	Bochum-Oelbachtal	DEA51	0.000688817	0.00010291
E	UKENSW_Agg000122		179225	50.7549	-1.81638	BOURNEMOUTH (HOLDENHURST)	UKK21	0.000688582	0.000102875
Ausbaugröße mal durchschnittlicher Auslastungsgrad im Berichtsjahr	DEAG_BW2265100000005		179206	49.5395	8.66483	Bergstraße,Weinheim	DE128	0.000688509	0.000102864
General calculation scheme	PTAGL508		179100	37.014	-7.93296	Ria Formosa Central	PT150	0.000688102	0.000102803
Charge moyenne maximale hebdomadaire qui pénètre dans la station d'épuration au cours de l'année, à l'exclusion des situations inhabituelles comme celles qui sont dues à de fortes précipitations + rejets directs sans traitement par déversoirs d'orage	FR040000117300	0	178571	46.1655	-1.17818	ROCHELLE	FRI32	0.00068607	0.0001025
(PROMEDIO ANUAL CAUDAL TRATADO(M3/D)* PROMEDIO ANUAL DE CONCENTRACIÃ“N DBO5 (MG/L) DEL INFLUENTE) / 60	ES9081360001010	0	178479	41.5428	2.26639	MONTORNES DEL VALLES	ES511	0.000685716	0.000102447
C	UKENAN_Agg000016		178440	52.1317	-0.416479	Bedford	UKH24	0.000685566	0.000102425
POBLACION RESIDENTE. POBLACION ESTACIONAL Y CARGA INDUSTRIAL	ES12150360001010	0	178139	43.4895	-8.22925	FERROL-NARON	ES111	0.00068441	0.000102252
E	CZAG554791		177865	49.7253	13.3734	Plzen	CZ032	0.000683357	0.000102095
Total agglomeration load=number of inhabitants (national census 2011)+ industry load + turism load (loads from maximum average week)	HRAG_0007012		177687	45.5541	18.709	Osijek	HR04B	0.000682673	0.000101992
Population register data for 2018 + industrial wastewater estimate + estimated non-resident population	FIYKR12_T0939X	0	177600	65.0371	25.4799	Oulu	FI1D9	0.000682339	0.000101942
POBLACION RESIDENTE. POBLACION ESTACIONAL Y CARGA INDUSTRIAL	ES12150782911010	0	177576	42.88	-8.54472	SANTIAGO	ES111	0.000682247	0.000101929
Estimation which includes resident population	ROAG_114364	0	176291	46.5066	24.4811	Cristesti	RO125	0.00067731	0.000101191
Total agglomeration load=number of inhabitants (national census 2011)+ industry load + turism load (loads from maximum average week)	HRAG_0001116		175961	45.3605	14.4293	Rijeka	HR031	0.000676042	0.000101002
Residenti + Turisti di punta + AE produttivi in fognatura	IT08000000000063	1	175040	44.7044	12.2331	COMACCHIO	ITH56	0.000672504	0.000100473
DS	DK437	0	175000	56.1474	8.94269	HERNING	DK041	0.00067235	0.00010045
Estimated	DEAG_NW909		175000	51.4262	6.71245	Duisburg-Rheinhausen	DEA12	0.00067235	0.00010045
The method was based on permanent population data (census 2011) supplemented by seasonal population (principally on the basis of accommodation facilities) and wherever applicable industrial contribution. In some cases the above findings were verified with the aid of the number of water meters indicative of the number of households, commercial facilities etc, served and on the basis of appropriate…	EL43100101	0	175000	35.3291	25.1388	IRAKLIO CRETE	EL431	0.00067235	0.00010045
E	CZAG500496		174907	49.5939	17.2516	Olomouc	CZ071	0.000671993	0.000100397
C	UKENNE_Agg000153		174884	53.6979	-1.86139	Halifax	UKE44	0.000671904	0.000100383
Estimated	DEAG_NW302		174725	52.0659	8.61499	Bielefeld, Brake	DEA41	0.000671293	0.000100292
resident population + non resident population + seasonal changes + industrial waste waterresident population	PLSL002		174619	50.1146	18.9964	Tychy	PL22C	0.000670886	0.000100231
Somma della popolazione residente, della popolazione fluttuante (alberghi e seconde case) e degli a.e. industriali stimati in base al numero di addetti ripartiti per tipologia di attività produttiva, secondo il metodo IRSA CNR.	IT20000000000185		174553	40.7257	8.55616	SASSARI	ITG25	0.000670633	0.000100193
ESTIMADO	ES1110040001010	0	174443	36.1308	-5.45282	ALGECIRAS	ES612	0.00067021	0.00010013
applied weighing factor: combined treated load from connected UWTTP's x 1.013	NLA08022	0	174421	52.2387	5.97143	APELDOORN	NL221	0.000670125	0.000100118
applied weighing factor: combined treated load from connected UWTTP's x 1.013	NLA08021	0	174421	52.0401	5.61938	EDE	NL221	0.000670125	0.000100118
ESTIMADO	ES8451650006010	0	174000	39.9632	-4.8325	TALAVERA DE LA REINA	ES425	0.000668508	9.9876e-05
resident population + non resident population + seasonal changes + industrial waste waterresident population	PLMP005		173935	49.6251	20.6913	Nowy Sącz	PL218	0.000668258	9.98387e-05
Residenti + Turisti di punta + AE produttivi in fognatura	IT08000000000153	1	173696	44.6917	10.6372	REGGIO_NELL_EMILIA_ALBINEA_MANCASALE	ITH53	0.00066734	9.97015e-05
Charge moyenne maximale hebdomadaire qui pénètre dans la station d'épuration au cours de l'année, à l'exclusion des situations inhabituelles comme celles qui sont dues à de fortes précipitations + rejets directs sans traitement par déversoirs d'orage	FR060000125056	0	173519	47.2381	6.01249	BESANCON	FRC21	0.00066666	9.95999e-05
C	UKENNW_Agg000098		173205	53.5364	-2.16187	Oldham	UKD37	0.000665454	9.94197e-05
applied weighing factor: combined treated load from connected UWTTP's x 1.013	NLA07020	0	172767	51.9725	6.00255	DUIVEN	NL226	0.000663771	9.91683e-05
Charge moyenne maximale hebdomadaire qui pénètre dans la station d'épuration au cours de l'année, à l'exclusion des situations inhabituelles comme celles qui sont dues à de fortes précipitations + rejets directs sans traitement par déversoirs d'orage	FR060000126362	0	172664	44.9284	4.91396	VALENCE1	FRK23	0.000663375	9.91091e-05
Ausbaugröße mal durchschnittlicher Auslastungsgrad im Berichtsjahr	DEAG_BYM-K0083		172383	48.3733	11.8933	AZV Erdinger Moos	DE21A	0.000662295	9.89478e-05
C	UKSC_Agg00121		172355	56.192	-3.013	Levenmouth	UKM72	0.000662188	9.89318e-05
E	UKENSW_Agg000075		171955	50.3962	-3.55321	Torquay, Paignton, Brixham	UKK42	0.000660651	9.87022e-05
General calculation scheme	PTAGL016		170000	38.6583	-9.0331	Barreiro/Moita	PT170	0.00065314	9.758e-05
treatment capacity of plant as indication for generated load	ATAG_8-Hohenems		170000	47.3656	9.66306	Hohenems (Region Hohenems)	AT342	0.00065314	9.758e-05
ESTIMADO	ES8130340002010	0	170000	38.9694	-3.89287	CIUDAD REAL-MIGUELTURRA	ES422	0.00065314	9.758e-05
General calculation scheme	PTAGL048		169400	40.2082	-8.45024	Coimbra	PT16E	0.000650835	9.72356e-05
Ausbaugröße mal durchschnittlicher Auslastungsgrad im Berichtsjahr	DEAG_BYM-K0121		169079	48.2338	11.3605	Amperverband	DE21C	0.000649602	9.70513e-05
Residenti + Turisti di punta + AE produttivi in fognatura	IT08000000000152	1	168957	44.4236	12.2025	RAVENNA_AREE_LIMITROFE	ITH57	0.000649133	9.69813e-05
Ausbaugröße mal durchschnittlicher Auslastungsgrad im Berichtsjahr	DEAG_BYKG-K0001		168787	50.0249	10.211	KA Schweinfurt	DE262	0.00064848	9.68837e-05
Calculated the sum of the data of the total wastewater load of the settlements constituting the agglomeration	HU-AGGL-AHX380		168717	47.2208	16.6223	Szombathely - Szennyvizelvezetesi Agglomeracio	HU222	0.000648211	9.68436e-05
Charge moyenne maximale hebdomadaire qui pénètre dans la station d'épuration au cours de l'année, à l'exclusion des situations inhabituelles comme celles qui sont dues à de fortes précipitations + rejets directs sans traitement par déversoirs d'orage	FR040000153130	0	168679	48.0618	-0.764223	LAVAL-53	FRG03	0.000648065	9.68217e-05
applied weighing factor: combined treated load from connected UWTTP's x 1.013	NLA15007	0	168534	51.9	4.3031	VLAARDINGEN	NL33C	0.000647508	9.67385e-05
Ausbaugröße mal durchschnittlicher Auslastungsgrad im Berichtsjahr	DEAG_BW3355100000005		168417	47.6739	9.18853	Konstanz	DE138	0.000647058	9.66714e-05
applied weighing factor: combined treated load from connected UWTTP's x 1.013	NLA17044	0	168328	51.8165	4.73683	DORDRECHT	NL33A	0.000646716	9.66203e-05
popolazione stanziale + popolazione fluttuante + popolazione industriale	IT03160121000125		167588	45.8094	9.08793	AG01307501_COMO	ITC42	0.000643873	9.61955e-05
C	UKENTH_Agg000103		167513	51.8479	-0.370388	Luton	UKH25	0.000643585	9.61525e-05
Charge moyenne maximale hebdomadaire qui pénètre dans la station d'épuration au cours de l'année, à l'exclusion des situations inhabituelles comme celles qui sont dues à de fortes précipitations + rejets directs sans traitement par déversoirs d'orage	FR050000133005	0	167269	44.7554	-1.0853	ANDERNOS-LES-BAINS	FRI12	0.000642647	9.60124e-05
Ausbaugröße mal durchschnittlicher Auslastungsgrad im Berichtsjahr	DEAG_BYWEN-K0159		167193	49.3791	11.9135	Zab Amberg-Kümmersbruck, Sitz Amberg	DE234	0.000642356	9.59688e-05
Calculated the sum of the data of the total wastewater load of the settlements constituting the agglomeration	HU-AGGL-AHX984		167151	47.6777	17.6637	Gyor - Szennyvizelvezetesi Agglomeracio	HU221	0.000642194	9.59447e-05
Ausbaugröße mal durchschnittlicher Auslastungsgrad im Berichtsjahr	DEAG_BW1255100000044		167048	49.2026	9.22321	Unteres Sulmtal	DE118	0.000641798	9.58856e-05
treatment capacity of plant as indication for generated load	ATAG_7-7930111		167000	47.4026	11.8354	Strass/Zillertal (Achental-Inntal-Zillertal)	AT335	0.000641614	9.5858e-05
E	UKENSW_Agg000023		166837	50.6917	-3.49091	Exeter	UKK43	0.000640988	9.57644e-05
C	UKENNW_Agg000049		166653	53.4603	-2.91148	North Liverpool ( Fazakerley)	UKD72	0.000640281	9.56588e-05
C	UKENAN_Agg000050		166205	52.2343	0.153917	Cambridge	UKH12	0.00063856	9.54017e-05
Estimated	DEAG_RP101950087		165956	50.3882	7.60417	Koblenz	DEB11	0.000637603	9.52587e-05
resident population + non resident population + seasonal changes + industrial waste waterresident population	PLLU001		165698	52.71	15.1615	Gorzów Wielkopolski	PL432	0.000636612	9.51107e-05
Ausbaugröße mal durchschnittlicher Auslastungsgrad im Berichtsjahr	DEAG_BYN-K0006		165600	49.4597	11.0433	Nürnberg II	DE254	0.000636235	9.50544e-05
il carico generato totale è la somma del carico generato dai residenti, dai fluttuanti e dai produttivi	IT05000000000014		165456	45.539	10.732	PESCHIERA_DEL_GARDA	ITH31	0.000635682	9.49717e-05
The calculation of the generated load includes resident population, seasonal population, tourism and industrial waste water.	CY51-Agglo		165000	34.6806	33.0433	Limassol	CY000	0.00063393	9.471e-05
Estimated	DEAG_NI152012201		165000	51.5541	9.9162	Göttingen	DE91C	0.00063393	9.471e-05
#NAME?	BE_F_AG_016	0	165000	51.0629	3.69425	Gent	BE234	0.00063393	9.471e-05
applied weighing factor: combined treated load from connected UWTTP's x 1.013	NLA07019	0	164409	52.1598	6.19268	ZUTPHEN	NL225	0.000631659	9.43708e-05
Estimated	DEAG_NW404		164333	51.7496	8.64143	Paderborn, Sande	DEA47	0.000631367	9.43271e-05
popolazione stanziale + popolazione fluttuante + popolazione industriale	IT03Q13000000002	1	164246	45.6867	9.54432	AG01603701_BREMBATE	ITC46	0.000631033	9.42772e-05
resident population + non resident population + seasonal changes + industrial waste waterresident population	PLMZ005		164212	52.1677	22.2738	Siedlce	PL925	0.000630903	9.42577e-05
stimato	IT12000000000085	1	164200	41.4649	12.8992	LATINA	ITI44	0.000630856	9.42508e-05
Carga anual media	ES10461100001010	0	164171	39.4546	-0.414522	ALAQUAS, ALDAIA, MANISES, MISLATA, QUART DE POBLET, XIRIVELLA	ES523	0.000630745	9.42342e-05
Estimated	DEAG_NW2411		164045	51.3961	8.16194	Arnsberg-Wildshausen	DEA57	0.000630261	9.41618e-05
ESTIMADO	ES14300161912010	0	163629	37.6602	-0.83264	MAR MENOR SUR	ES620	0.000628663	9.3923e-05
Residenti+fluttuanti+reflui industriali in fognatura	IT1987004_01		163285	37.6341	15.1335	ACIREALE_CONSORTILE	ITG17	0.000627341	9.37256e-05
Estimated	DEAG_NW2782		162852	52.325	8.93201	Minden, Leteln	DEA46	0.000625677	9.3477e-05
Charge moyenne maximale hebdomadaire qui pénètre dans la station d'épuration au cours de l'année, à l'exclusion des situations inhabituelles comme celles qui sont dues à de fortes précipitations + rejets directs sans traitement par déversoirs d'orage	FR030000178646	0	162659	48.8073	2.11845	VERSAILLES	FR103	0.000624936	9.33663e-05
Estimated	DEAG_NW607		162136	51.1738	6.98863	Solingen-Ohligs	DEA19	0.000622927	9.30661e-05
C	UKWAWA_Agg000041		161798	51.4777	-3.6199	Bridgend	UKL17	0.000621628	9.28721e-05
La consistenza nominale è stata calcolata per residenti e fluttuanti, partendo dai dati ISTAT 2001, dettagliando il dato spaziale con la tecnica del Dasymetric Mapping (tecnica statistica che permette di dettagliare la densità della popolazione sul	IT100000000012	0	161590	43.1083	12.391	PERUGIA	ITI21	0.000620829	9.27527e-05
Ausbaugröße mal durchschnittlicher Auslastungsgrad im Berichtsjahr	DEAG_BYKC-K0001		161367	49.9122	10.8612	Bamberg	DE241	0.000619972	9.26247e-05
The method was based on permanent population data (census 2011) supplemented by seasonal population (principally on the basis of accommodation facilities) and wherever applicable industrial contribution. In some cases the above findings were verified with the aid of the number of water meters indicative of the number of households, commercial facilities etc, served and on the basis of appropriate…	EL14300101	0	161000	39.3682	22.9419	VOLOS	EL613	0.000618562	9.2414e-05
resident population + non resident population + seasonal changes + industrial waste waterresident population	PLWL003		160491	51.7626	18.0898	Kalisz	PL416	0.000616606	9.21218e-05
treatment capacity of plant as indication for generated load	ATAG_4-41812001		160000	48.1822	14.1375	Wels und Umgebung	AT312	0.00061472	9.184e-05
DS	DK429	0	160000	57.7247	10.5829	SKAGEN	DK050	0.00061472	9.184e-05
ESTIMADO	ES11060150004020	0	160000	38.8765	-6.974	BADAJOZ	ES431	0.00061472	9.184e-05
Estimated	DEAG_NW1203		159918	51.5361	7.52242	Dortmund-Scharnhorst	DEA52	0.000614405	9.17929e-05
Charge moyenne maximale hebdomadaire qui pénètre dans la station d'épuration au cours de l'année, à l'exclusion des situations inhabituelles comme celles qui sont dues à de fortes précipitations + rejets directs sans traitement par déversoirs d'orage	FR030000177284	0	159833	48.96	2.89846	MEAUX	FR102	0.000614078	9.17441e-05
applied weighing factor: combined treated load from connected UWTTP's x 1.013	NLA30003	0	159240	50.8712	5.7054	MAASTRICHT	NL423	0.0006118	9.14038e-05
Charge moyenne maximale hebdomadaire qui pénètre dans la station d'épuration au cours de l'année, à l'exclusion des situations inhabituelles comme celles qui sont dues à de fortes précipitations + rejets directs sans traitement par déversoirs d'orage	FR060000106004	0	159019	43.5882	7.09405	ANTIBES	FRL03	0.000610951	9.12769e-05
Estimated	DEAG_NW316		158909	51.9451	8.38233	Abwasserverband Obere Lutter	DEA42	0.000610528	9.12138e-05
Residenti + Turisti di punta + AE produttivi in fognatura	IT08000000000084	1	158835	44.2052	12.0607	FORLI	ITH58	0.000610244	9.11713e-05
General calculation scheme	PTAGL097		158500	41.549	-8.42017	Braga	PT112	0.000608957	9.0979e-05
Estimated	DEAG_SL240		158350	49.2425	6.9228	KA BURBACH	44166	0.000608381	9.08929e-05
calculated (JAM * Konzentration=t/a)	DEAG_MV04.04.2 wbu1228		158151	53.5235	11.358	Schwerin Süd	DE804	0.000607616	9.07787e-05
popolazione stanziale + popolazione fluttuante + popolazione industriale	IT03160121000366		157820	45.6436	9.14969	AG01523101_SEVESO_NORD	ITC4D	0.000606344	9.05887e-05
Ausbaugröße mal durchschnittlicher Auslastungsgrad im Berichtsjahr	DEAG_BYAB-K0022		157654	49.8584	9.16068	Elsenfeld	DE269	0.000605707	9.04934e-05
Calculation which Includes resident population, economic activities, tourism, seasonal changes (connected or not), industries discharging into networks/WWTP (max average weekly loads)	ROAG_106327	0	157586	47.6604	23.5838	Baia Mare (municipiu Baia Mare), Baia Sprie, Tautii de Sus (oras Baia Sprie)	RO114	0.000605445	9.04544e-05
Charge moyenne maximale hebdomadaire qui pénètre dans la station d'épuration au cours de l'année, à l'exclusion des situations inhabituelles comme celles qui sont dues à de fortes précipitations + rejets directs sans traitement par déversoirs d'orage	FR040000129024	0	157550	48.275	-3.56118	CARHAIX-PLOUGUER	FRH02	0.000605307	9.04337e-05
Charge moyenne maximale hebdomadaire qui pénètre dans la station d'épuration au cours de l'année, à l'exclusion des situations inhabituelles comme celles qui sont dues à de fortes précipitations + rejets directs sans traitement par déversoirs d'orage	FR010000162160	0	157432	50.7322	1.60781	BOULOGNE-SUR-MER	FRE12	0.000604854	9.0366e-05
calculated	BGAG63427_00		157148	43.8445	25.9539	Ruse	BG323	0.000603763	9.0203e-05
Calculation which includes resident population, economic activities, tourism, seasonal changes (connected or not), industries discharging into networks/WWTP (max average weekly loads)	ROAG_143469	0	156693	45.785	24.145	Sibiu (Sibiu, Selimbar)	RO126	0.000602015	8.99418e-05
POBLACION RESIDENTE. POBLACION ESTACIONAL Y CARGA INDUSTRIAL	ES12320541302010	0	156503	42.351	-7.89408	OURENSE	ES113	0.000601285	8.98327e-05
Calculation which includes resident population, economic activities, tourism, seasonal changes (connected or not), industries discharging into networks/WWTP (max average weekly loads)	ROAG_9271	0	155893	46.1712	21.3339	Arad	RO421	0.000598941	8.94826e-05
resident population + non resident population + seasonal changes + industrial waste waterresident population	PLSL008		155696	50.2975	18.9532	CHORZÓW-ŚWIĘTOCHŁOWICE	PL22A	0.000598184	8.93695e-05
Ausbaugröße mal durchschnittlicher Auslastungsgrad im Berichtsjahr	DEAG_BB176		155589	52.4886	13.6588	Münchehofe	DE409	0.000597773	8.93081e-05
resident population + non resident population + seasonal changes + industrial waste waterresident population	PLMZ007		155514	52.8825	20.6186	Ciechanów	PL922	0.000597485	8.9265e-05
Charge moyenne maximale hebdomadaire qui pénètre dans la station d'épuration au cours de l'année, à l'exclusion des situations inhabituelles comme celles qui sont dues à de fortes précipitations + rejets directs sans traitement par déversoirs d'orage	FR100000197411	0	155127	-20.8854	55.4949	SAINT-DENIS-GRAND PRADO	FRY40	0.000595998	8.90429e-05
Estimated	DEAG_TH8646		155069	50.9208	12.0304	Gera/Bad Köstritz	DEG02	0.000595775	8.90096e-05
Charge moyenne maximale hebdomadaire qui pénètre dans la station d'épuration au cours de l'année, à l'exclusion des situations inhabituelles comme celles qui sont dues à de fortes précipitations + rejets directs sans traitement par déversoirs d'orage	FR060000113001	0	154773	43.501	5.37322	AIX-EN-PROVENCE-1	FRL04	0.000594638	8.88397e-05
Charge moyenne maximale hebdomadaire qui pénètre dans la station d'épuration au cours de l'année, à l'exclusion des situations inhabituelles comme celles qui sont dues à de fortes précipitations + rejets directs sans traitement par déversoirs d'orage	FR010000180021	0	154404	49.9053	2.27341	AMIENS	FRE23	0.00059322	8.86279e-05
applied weighing factor: combined treated load from connected UWTTP's x 1.013	NLA13041	0	154111	52.2025	4.44017	KATWIJK	NL337	0.000592094	8.84597e-05
Estimated	DEAG_NI401000201		153928	53.0657	8.64946	Delmenhorst	DE941	0.000591391	8.83547e-05
C	UKENAN_Agg000308		153921	51.4567	0.378612	Tilbury	UKH32	0.000591364	8.83507e-05
Charge moyenne maximale hebdomadaire qui pénètre dans la station d'épuration au cours de l'année, à l'exclusion des situations inhabituelles comme celles qui sont dues à de fortes précipitations + rejets directs sans traitement par déversoirs d'orage	FR060000111069	0	153875	43.2121	2.32714	CARCASSONNE	FRJ11	0.000591188	8.83242e-05
applied weighing factor: combined treated load from connected UWTTP's x 1.013	NLA13033	0	153672	52.1365	4.47403	LEIDEN	NL337	0.000590408	8.82077e-05
Residenti + Turisti di punta + AE produttivi in fognatura	IT08000000000057	1	153645	44.2546	12.3405	CERVIA	ITH57	0.000590304	8.81922e-05
Ausbaugröße mal durchschnittlicher Auslastungsgrad im Berichtsjahr	DEAG_BYHO-K0180		153516	50.1009	11.4197	Kulmbach	DE24B	0.000589808	8.81182e-05
General calculation scheme	PTAGL065		153400	38.9015	-9.03731	Alverca	PT170	0.000589363	8.80516e-05
Carico stimato in sede di approfondimento progettuale (fonte Documento di fattibilità delle alternative progettuali redatto dal Comune - anno 2020)	IT18Q19000001570		153002	39.5749	16.6356	Corigliano-Rossano	ITF61	0.000587834	8.78231e-05
Based on the resident polulation, non-resident population and industrial waste water + seasonal changes	SE_AGGLO_1015		153000	59.6183	16.5402	AGGLO_VAESTERAAS	SE125	0.000587826	8.7822e-05
DS	DK434	0	152177	56.4534	10.0692	RANDERS	DK042	0.000584664	8.73496e-05
DS	DK455	0	151800	55.8549	9.85781	HORSENS	DK042	0.000583216	8.71332e-05
Estimated	DEAG_HE064350140131		151723	50.1285	8.87323	Hanau / Nordwest	DE719	0.00058292	8.7089e-05
Ausbaugröße mal durchschnittlicher Auslastungsgrad im Berichtsjahr	DEAG_BB266		151611	52.6178	13.092	Wansdorf	DE408	0.000582489	8.70247e-05
Estimated	DEAG_NI256022201		151501	52.6525	9.20712	Nienburg	DE927	0.000582067	8.69616e-05
resident population + non resident population + seasonal changes + industrial waste waterresident population	PLPK011		151343	50.2535	22.4229	Leżajsk	PL824	0.00058146	8.68709e-05
resident population + non resident population + seasonal changes + industrial waste waterresident population	PLSL017		151317	50.0934	18.5422	Rybnik	PL227	0.00058136	8.6856e-05
Charge moyenne maximale hebdomadaire qui pénètre dans la station d'épuration au cours de l'année, à l'exclusion des situations inhabituelles comme celles qui sont dues à de fortes précipitations + rejets directs sans traitement par déversoirs d'orage	FR050000119031	0	150888	45.1503	1.52204	BRIVE-LA-GAILLARDE	FRI21	0.000579712	8.66097e-05
POBLACION RESIDENTE. POBLACION ESTACIONAL Y CARGA INDUSTRIAL	ES12360381006010	0	150594	42.4	-8.68653	PONTEVEDRA-MARIN-POIO	ES114	0.000578582	8.6441e-05
resident population + non resident population + seasonal changes + industrial waste waterresident population	PLMZ010		150038	52.8529	19.6673	Sierpc	PL923	0.000576446	8.61218e-05
Treatment capacity of the plant	NO-11-007		150000	58.6183	5.64997	Varhaug	NO04	0.0005763	8.61e-05
The method was based on permanent population data (census 2011) supplemented by seasonal population (principally on the basis of accommodation facilities) and wherever applicable industrial contribution. In some cases the above findings were verified with the aid of the number of water meters indicative of the number of households, commercial facilities etc, served and on the basis of appropriate…	EL42100101	0	150000	36.4369	28.223	RODOS	EL421	0.0005763	8.61e-05
treatment capacity of plant as indication for generated load	ATAG_3-104		150000	48.1086	14.8963	Raum Amstetten (Amstetten-Schönbichl)	AT121	0.0005763	8.61e-05
treatment capacity of plant as indication for generated load	ATAG_8-Dornbirn		150000	47.4317	9.72592	Dornbirn (Dornbirn-Schwarzach)	AT342	0.0005763	8.61e-05
Estimated	DEAG_HE066310091101		150000	50.5742	9.64001	Fulda / Gläserzell	DE732	0.0005763	8.61e-05
Residenti+Turisti di punta+AE produttivi in fognatura (Rilevazione diretta presso Comune Anno 2012)	IT18Q90000001723		149626	38.4245	15.899	Gioia Tauro	ITF65	0.000574863	8.58853e-05
resident population + non resident population + seasonal changes + industrial waste waterresident population	PLWL004		149442	53.0807	16.454	Piła	PL411	0.000574156	8.57797e-05
applied weighing factor: combined treated load from connected UWTTP's x 1.013	NLA30015	0	149152	50.9126	5.91497	HOENSBROEK	NL423	0.000573042	8.56132e-05
SEGUN ESQUEMA GENERAL DE CALCULO	ES13281300002010	0	149141	40.4134	-3.5156	SAN FERNANDO DE HENARES (CASAQUEMADA)	ES300	0.000573	8.56069e-05
Metodologia di calcolo: Popolazione residente, presente, pendolare e in strutture alberghiere, abitanti in seconde abitazioni, servizi ristorazione, attività manifatturiere micro, attività manifatturiere medio grandi. Gli agglomerati sono stati individuat	IT160000000060		149050	41.2283	16.2944	ANDRIA	ITF48	0.00057265	8.55547e-05
resident population + non resident population + seasonal changes + industrial waste waterresident population	PLPL002		148548	54.0968	22.928	Suwałki	PL843	0.000570721	8.52666e-05
(PROMEDIO ANUAL CAUDAL TRATADO(M3/D)* PROMEDIO ANUAL DE CONCENTRACIÃ“N DBO5 (MG/L) DEL INFLUENTE) / 60	ES9082980001010	0	148419	41.9296	2.25951	VIC	ES511	0.000570226	8.51925e-05
Charge moyenne maximale hebdomadaire qui pénètre dans la station d'épuration au cours de l'année, à l'exclusion des situations inhabituelles comme celles qui sont dues à de fortes précipitations + rejets directs sans traitement par déversoirs d'orage	FR080000197209	0	148304	14.6391	-61.0726	FORT-DE-FRANCE	FRY20	0.000569784	8.51265e-05
applied weighing factor: combined treated load from connected UWTTP's x 1.013	NLA13044	0	148269	52.3034	4.60687	ZWAANSHOEK	NL329	0.000569649	8.51064e-05
C	UKENNE_Agg000208		148103	53.3671	-1.3497	Sheffield (Woodhouse Mill)	UKE31	0.000569012	8.50111e-05
Calculated the sum of the data of the total wastewater load of the settlements constituting the agglomeration	HU-AGGL-AHY107		148093	46.3771	17.8095	Kaposvar - Szennyvizelvezetesi Agglomeracio	HU232	0.000568973	8.50054e-05
Based on the resident polulation, non-resident population and industrial waste water + seasonal changes	SE_AGGLO_1011		148000	56.6756	12.8521	AGGLO_HALMSTAD	SE231	0.000568616	8.4952e-05
General calculation scheme	PTAGL112		148000	41.3775	-8.76056	Povoa de Varzim/Vila do Conde	PT11A	0.000568616	8.4952e-05
DS	DK340	0	148000	55.421	11.7981	RINGSTED	DK022	0.000568616	8.4952e-05
A.E.T.	IT17Q150000064		148000	40.636	15.8056	POTENZA	ITF51	0.000568616	8.4952e-05
General calculation scheme	PTAGL062		147900	38.6821	-9.15491	Almada	PT170	0.000568232	8.48946e-05
Charge moyenne maximale hebdomadaire qui pénètre dans la station d'épuration au cours de l'année, à l'exclusion des situations inhabituelles comme celles qui sont dues à de fortes précipitations + rejets directs sans traitement par déversoirs d'orage	FR010000162041	0	147433	50.2918	2.76362	ARRAS	FRE12	0.000566438	8.46265e-05
Sum of inhabitants and industry contributions expressed in PE60	SKA2070039		147000	48.37	17.58	Trnava	SK021	0.000564774	8.4378e-05
C	UKENAN_Agg000144		146756	52.0335	1.16898	Ipswich	UKH14	0.000563837	8.42379e-05
Charge moyenne maximale hebdomadaire qui pénètre dans la station d'épuration au cours de l'année, à l'exclusion des situations inhabituelles comme celles qui sont dues à de fortes précipitations + rejets directs sans traitement par déversoirs d'orage	FR030000178361	0	146454	48.9977	1.6888	MANTES-LA-JOLIE	FR103	0.000562676	8.40646e-05
Carga anual media	ES10030140002011	0	146322	38.3832	-0.464619	ALACANT, EL CAMPELLO, MUTXAMEL, SANT JOAN D'ALACANT	ES521	0.000562169	8.39888e-05
Ausbaugröße mal durchschnittlicher Auslastungsgrad im Berichtsjahr	DEAG_SH1000		146254	54.8049	9.44606	Flensburg	DEF01	0.000561908	8.39498e-05
Estimated	DEAG_NW3061		146233	52.3083	7.43641	Rheine-Nord	DEA37	0.000561827	8.39377e-05
CARGA DE ENTRADA EN LA EDAR (WWTP) = CARGA GENERADA EN LA AGLOMERACION PORQUE EL 100% DE LA CARGA GENERADA ESTá CONECTADA A LA EDAR	ES15312320001010	0	145718	42.0426	-1.6287	TUDELA	ES220	0.000559849	8.36421e-05
C	UKWAWA_Agg000078		145599	51.5716	-3.7898	Port Talbot And Neath	UKL17	0.000559391	8.35738e-05
POBLACION RESIDENTE. POBLACION ESTACIONAL Y CARGA INDUSTRIAL	ES12270282701010	0	145598	43.0134	-7.55704	LUGO	ES112	0.000559388	8.35733e-05
The method was based on permanent population data (census 2011) supplemented by seasonal population (principally on the basis of accommodation facilities) and wherever applicable industrial contribution. In some cases the above findings were verified with the aid of the number of water meters indicative of the number of households, commercial facilities etc, served and on the basis of appropriate…	EL14200101	0	145592	39.6283	22.4228	LARISSA	EL612	0.000559364	8.35698e-05
Estimated	DEAG_NI103000201		145554	52.4701	10.8015	Wolfsburg	DE913	0.000559218	8.3548e-05
Estimated	DEAG_NW3013		145467	51.9352	7.13386	Coesfeld	DEA35	0.000558884	8.34981e-05
Calculated the sum of the data of the total wastewater load of the settlements constituting the agglomeration	HU-AGGL-AHW709		145095	46.4128	20.3763	Hodmezovasarhely - Szennyvizelvezetesi Agglomeracio	HU333	0.000557455	8.32845e-05
Total agglomeration load=number of inhabitants (national census 2011)+ industry load + turism load (loads from maximum average week)	HRAG_0005035		145042	46.3094	16.2892	Varaždin	HR044	0.000557251	8.32541e-05
Based on the resident polulation, non-resident population and industrial waste water + seasonal changes	SE_AGGLO_1007		145000	59.2782	15.2051	AGGLO_OEREBRO	SE124	0.00055709	8.323e-05
Estimated	DEAG_NI254021201		145000	52.1797	9.92479	Hildesheim	DE925	0.00055709	8.323e-05
C	UKENMI_Agg000018		144829	52.6125	-2.14913	WOLVERHAMPTON (BARNHURST)	UKG39	0.000556433	8.31318e-05
Ausbaugröße mal durchschnittlicher Auslastungsgrad im Berichtsjahr	DEAG_BYDON-K0220		144661	48.4245	10.0313	Zweckverband Klärwerk Steinhäule	DE279	0.000555788	8.30354e-05
Charge moyenne maximale hebdomadaire qui pénètre dans la station d'épuration au cours de l'année, à l'exclusion des situations inhabituelles comme celles qui sont dues à de fortes précipitations + rejets directs sans traitement par déversoirs d'orage	FR050000331555	0	144319	43.6094	1.41949	TOULOUSE-RIVE DROITE	FRJ23	0.000554474	8.28391e-05
treatment capacity of plant as indication for generated load	ATAG_3-142		144000	48.1788	16.5466	Groß-Enzersdorf	AT126	0.000553248	8.2656e-05
C	UKENAN_Agg000055		143980	51.7323	0.515479	Chelmsford	UKH36	0.000553171	8.26445e-05
Estimated	DEAG_NW1861		143875	50.9616	7.09549	Bergisch-Gladbach	DEA2B	0.000552768	8.25842e-05
Charge moyenne maximale hebdomadaire qui pénètre dans la station d'épuration au cours de l'année, à l'exclusion des situations inhabituelles comme celles qui sont dues à de fortes précipitations + rejets directs sans traitement par déversoirs d'orage	FR060000184007	0	143833	43.922	4.81836	AVIGNON	FRL06	0.000552606	8.25601e-05
Estimated	DEAG_HE065340143511		143630	50.7672	8.75719	Marburg / Cappel	DE724	0.000551826	8.24436e-05
Charge moyenne maximale hebdomadaire qui pénètre dans la station d'épuration au cours de l'année, à l'exclusion des situations inhabituelles comme celles qui sont dues à de fortes précipitations + rejets directs sans traitement par déversoirs d'orage	FR06000022B033	0	143466	42.6906	9.42307	BASTIA-SUD	FRM02	0.000551196	8.23495e-05
General calculation scheme	PTAGL443		143400	41.3739	-8.384	Lordelo-Aves	PT119	0.000550943	8.23116e-05
applied weighing factor: combined treated load from connected UWTTP's x 1.013	NLA09016	0	143341	51.9673	5.85477	ARNHEM	NL226	0.000550716	8.22777e-05
Carga anual media	ES10031330002060	0	143258	37.9711	-0.704181	TORREVIEJA	ES521	0.000550397	8.22301e-05
Estimated	DEAG_RP105510114		143168	49.774	6.68659	Trier Hauptklärwerk	DEB21	0.000550051	8.21784e-05
Charge moyenne maximale hebdomadaire qui pénètre dans la station d'épuration au cours de l'année, à l'exclusion des situations inhabituelles comme celles qui sont dues à de fortes précipitations + rejets directs sans traitement par déversoirs d'orage	FR030000151230	0	142920	49.0307	3.92363	EPERNAY	FRF23	0.000549099	8.20361e-05
General calculation scheme	PTAGL015		142900	38.6448	-9.15087	Corroios/Quinta da Bomba	PT170	0.000549022	8.20246e-05
C	UKENTH_Agg000050		142746	51.1466	-0.160017	London (Crawley)	UKJ28	0.00054843	8.19362e-05
C - Población de derecho + Población estacional + Población asociada sector turístico + Población equivalente asociada al sector industrial	ES3330242402010	1	142672	43.538	-5.67	GIJON ESTE	ES120	0.000548146	8.18937e-05
resident population + non resident population + seasonal changes + industrial waste waterresident population	PLWM002		142351	54.1611	19.4085	Elbląg	PL621	0.000546913	8.17095e-05
resident population + non resident population + seasonal changes + industrial waste waterresident population	PLPM005		142024	54.7194	18.4033	Puck	PL634	0.000545656	8.15218e-05
#NAME?	BE_F_AG_046	0	142000	51.1921	4.38036	Antwerpen-Zuid	BE211	0.000545564	8.1508e-05
Residenti+Turisti di punta+AE produttivi in fognatura (Rilevazione diretta presso Comuni Anno 2016)	IT18Q90000001584		142000	39.749	15.8365	Santa Maria del Cedro	ITF61	0.000545564	8.1508e-05
Estimated	DEAG_NI252006201		141739	52.1229	9.32972	Hameln	DE923	0.000544561	8.13582e-05
Charge moyenne maximale hebdomadaire qui pénètre dans la station d'épuration au cours de l'année, à l'exclusion des situations inhabituelles comme celles qui sont dues à de fortes précipitations + rejets directs sans traitement par déversoirs d'orage	FR060000134301	0	141709	43.4101	3.6801	SETE	FRJ13	0.000544446	8.1341e-05
applied weighing factor: combined treated load from connected UWTTP's x 1.013	NLA12022	0	141443	52.4742	4.6686	BEVERWIJK	NL323	0.000543424	8.11883e-05
C	UKENSO_Agg000091		141259	50.857	0.507194	Bexhill and Hastings	UKJ22	0.000542717	8.10827e-05
resident population + non resident population + seasonal changes + industrial waste waterresident population	PLSL014		140696	50.286	18.875	Ruda Śląska	PL22A	0.000540554	8.07595e-05
E	CZAG544256		140654	48.9743	14.4731	Ceske Budejovice	CZ031	0.000540393	8.07354e-05
treatment capacity of plant as indication for generated load	ATAG_3-643		140500	48.0308	16.8261	Raum Bruck/Leitha-Neusiedl/See (Rohrau-Pachfurth)	AT127	0.000539801	8.0647e-05
stima riferita ai dati ISTAT ATU del 2009 (Abitanti totali Urbani)	IT090000000191		140424	44.0175	10.1099	MASSA	ITI11	0.000539509	8.06034e-05
C	UKENSO_Agg000083		140310	50.8205	-0.340279	Worthing	UKJ27	0.000539071	8.05379e-05
C	UKENSO_Agg000001		140034	50.9105	-1.45066	SOUTHAMPTON WEST (MILLBROOK)	UKJ32	0.000538011	8.03795e-05
Based on the resident polulation, non-resident population and industrial waste water + seasonal changes	SE_AGGLO_1010		140000	63.8313	20.2474	AGGLO_UMEAA	SE331	0.00053788	8.036e-05
treatment capacity of plant as indication for generated load	ATAG_4-40201001		140000	48.0639	14.4328	Steyr und Umgebung	AT314	0.00053788	8.036e-05
General calculation scheme	PTAGL042		140000	37.1372	-8.54092	Portimao	PT150	0.00053788	8.036e-05
SEGUN ESQUEMA GENERAL DE CALCULO	ES13281340005010	0	139925	40.5365	-3.58487	SAN SEBASTIAN DE LOS REYES (ARROYO DE LA VEGA)	ES300	0.000537592	8.03169e-05
Ausbaugröße mal durchschnittlicher Auslastungsgrad im Berichtsjahr	DEAG_SH58044		139764	54.0633	9.93297	Neumünster	DEF0B	0.000536973	8.02245e-05
C	UKENSO_Agg000016		139087	50.6633	-1.14961	Sandown	UKJ34	0.000534372	7.98359e-05
Calculation which includes resident population, economic activities, tourism, seasonal changes (connected or not), industries discharging into networks/WWWTP (max average weekly loads)	ROAG_44818	0	138905	45.1502	26.8198	Buzau	RO222	0.000533673	7.97315e-05
residenti + turisti + industria + altri	IT210000001020		138711	46.8302	11.9414	MEDIA PUSTERIA	ITH10	0.000532928	7.96201e-05
C	UKENMI_Agg000186		138637	53.5433	-0.681789	Scunthorpe	UKE13	0.000532643	7.95776e-05
C	UKENTH_Agg000033		138526	51.3281	-0.769955	Camberley	UKJ37	0.000532217	7.95139e-05
(PROMEDIO ANUAL CAUDAL TRATADO(M3/D)* PROMEDIO ANUAL DE CONCENTRACIÃ“N DBO5 (MG/L) DEL INFLUENTE) / 60	ES9081630001040	0	138475	41.6287	2.69129	PINEDA DE MAR (ALT MARESME NORD)	ES511	0.000532021	7.94847e-05
C	UKENAN_Agg000116		138215	53.58	-0.0951167	Grimsby	UKE13	0.000531022	7.93354e-05
(PROMEDIO ANUAL CAUDAL TRATADO(M3/D)* PROMEDIO ANUAL DE CONCENTRACIÃ“N DBO5 (MG/L) DEL INFLUENTE) / 60	ES9431480013010	0	138133	41.1181	1.25256	TARRAGONA	ES514	0.000530707	7.92883e-05
applied weighing factor: combined treated load from connected UWTTP's x 1.013	NLA07022	0	138122	51.9327	6.32052	ETTEN (G)	NL225	0.000530665	7.9282e-05
popolazione stanziale + popolazione fluttuante + popolazione industriale	IT03160121000257		137958	45.5924	8.91908	AG01504601_OLONA_NORD	ITC4C	0.000530035	7.91879e-05
Ausbaugröße mal durchschnittlicher Auslastungsgrad im Berichtsjahr	DEAG_BW2165100000006		137766	48.7791	8.21529	Baden-Baden/Sinzheim	DE124	0.000529297	7.90777e-05
SEGUN METODO GENERAL	ES13281230007010	0	137412	40.3313	-3.53802	MADRID VII (SUR ORIENTAL)	ES300	0.000527937	7.88745e-05
applied weighing factor: combined treated load from connected UWTTP's x 1.013	NLA30024	0	137290	51.2193	5.98885	ROERMOND	NL422	0.000527468	7.88045e-05
ESTIMADO	ES1290540001010	0	137105	36.564	-4.63371	FUENGIROLA	ES617	0.000526757	7.86983e-05
Based on the resident polulation, non-resident population and industrial waste water + seasonal changes	SE_AGGLO_1013		137000	57.7547	14.1276	AGGLO_JOENKOEPING	SE211	0.000526354	7.8638e-05
In Wallonia, the load generated by an inhabitant has been determined at 54 g BOD/day in accordance with a scientific study conducted by CEBEDEAU. So, 1 inhabitant = 0,9 PE. Moreover, the population is determined on the basis of the cadastral reference	BERW02001	0	137000	50.6962	4.57117	WAVRE	BE310	0.000526354	7.8638e-05
C	UKENNW_Agg000115		136888	53.458	-2.70058	St Helens	UKD71	0.000525924	7.85737e-05
Charge moyenne maximale hebdomadaire qui pénètre dans la station d'épuration au cours de l'année, à l'exclusion des situations inhabituelles comme celles qui sont dues à de fortes précipitations + rejets directs sans traitement par déversoirs d'orage	FR040000186194	0	136684	46.5691	0.348211	POITIERS	FRI34	0.00052514	7.84566e-05
resident population + non resident population + seasonal changes + industrial waste waterresident population	PLDO002		136564	50.7678	16.2825	WAŁBRZYCH	PL517	0.000524679	7.83877e-05
C	UKENSO_Agg000090		136344	50.8193	-0.586096	Littlehampton and Bognor	UKJ27	0.000523834	7.82615e-05
Charge moyenne maximale hebdomadaire qui pénètre dans la station d'épuration au cours de l'année, à l'exclusion des situations inhabituelles comme celles qui sont dues à de fortes précipitations + rejets directs sans traitement par déversoirs d'orage	FR040000129019	0	136300	48.3905	-4.4982	BREST-RIVE GAUCHE	FRH02	0.000523665	7.82362e-05
Estimated	DEAG_NI451004201		136283	53.1103	7.98078	Edewecht	DE946	0.000523599	7.82264e-05
Ausbaugröße mal durchschnittlicher Auslastungsgrad im Berichtsjahr	DEAG_BYKE-K0016		136131	47.5994	10.2652	ZV Obere Iller Sitz Sonthofen	DE27E	0.000523015	7.81392e-05
Estimated	DEAG_NI253009201		135983	52.4436	9.76534	Langenhagen	DE929	0.000522447	7.80542e-05
C	UKENMI_Agg000256		135673	51.9222	-2.14785	Cheltenham	UKK13	0.000521256	7.78763e-05
Residenti + Turisti di punta + AE produttivi in fognatura	IT08000000000053	1	135632	43.94	12.6837	CATTOLICA_MISANO_VAL_CONCA	ITH59	0.000521098	7.78528e-05
Charge moyenne maximale hebdomadaire qui pénètre dans la station d'épuration au cours de l'année, à l'exclusion des situations inhabituelles comme celles qui sont dues à de fortes précipitations + rejets directs sans traitement par déversoirs d'orage	FR060000134003	0	135580	43.3181	3.48219	AGDE-VIAS	FRJ13	0.000520898	7.78229e-05
Estimated	DEAG_NI353031201		135500	53.4064	10.0383	Glüsingen	DE933	0.000520591	7.7777e-05
Charge moyenne maximale hebdomadaire qui pénètre dans la station d'épuration au cours de l'année, à l'exclusion des situations inhabituelles comme celles qui sont dues à de fortes précipitations + rejets directs sans traitement par déversoirs d'orage	FR020000167329	0	135473	48.4582	7.48678	OBERNAI	FRF11	0.000520487	7.77615e-05
Estimated	DEAG_NW2797		135214	52.1326	8.66905	Herford, ZKA	DEA43	0.000519492	7.76128e-05
applied weighing factor: combined treated load from connected UWTTP's x 1.013	NLA04026	0	135108	52.5087	6.04935	ZWOLLE	NL211	0.000519085	7.7552e-05
Estimated	DEAG_RP100601008		135102	49.4593	7.74261	Kaiserslautern	DEB32	0.000519062	7.75485e-05
Measured and estimated	IEAG_D0004	1	135012	53.3688	-6.48726	Lower Liffey Valley Regional Sewerage Scheme	IE062	0.000518716	7.74969e-05
Residenti + Turisti di punta + AE produttivi in fognatura	IT08000000000155	1	135008	43.9939	12.6417	RICCIONE	ITH59	0.000518701	7.74946e-05
Use of a weighting factor	NO-07-005		135000	59.2474	10.4003	Tønsberg	NO03	0.00051867	7.749e-05
Charge moyenne maximale hebdomadaire qui pénètre dans la station d'épuration au cours de l'année, à l'exclusion des situations inhabituelles comme celles qui sont dues à de fortes précipitations + rejets directs sans traitement par déversoirs d'orage	FR030000178440	0	134660	49.0752	1.77173	MUREAUX	FR108	0.000517364	7.72948e-05
ESTIMADO	ES5350020002010	0	134086	27.8463	-15.4366	PLAYA DE ARINAGA	ES705	0.000515158	7.69654e-05
popolazione residente + abitanti seconde case + attività ristoratrici bar+ristoranti + posti letto alberghi+alloggi per turisti + popolazione presente non residente+attività industriali allacciate alla fogna	IT1300000014		134000	42.5154	14.1348	MONTESILVANO-SILVI-CITTA' S,ANGELO-PESCARA	ITF13	0.000514828	7.6916e-05
Population register data for 2018 + industrial wastewater estimate + estimated non-resident population	FIYKR12_T0479	0	134000	60.5066	26.9174	Kotkan kt.	FI1C4	0.000514828	7.6916e-05
General calculation scheme ( industry+inhabitants*weighting factor)	SI00029	0	133977	46.5519	15.6449	SI_MARIBOR_29	SI032	0.00051474	7.69028e-05
applied weighing factor: combined treated load from connected UWTTP's x 1.013	NLA29003	0	133496	51.6962	5.89348	HAPS	NL413	0.000512892	7.66267e-05
C	UKENAN_Agg000063		133449	51.8744	0.936332	Colchester	UKH34	0.000512711	7.65997e-05
Charge moyenne maximale hebdomadaire qui pénètre dans la station d'épuration au cours de l'année, à l'exclusion des situations inhabituelles comme celles qui sont dues à de fortes précipitations + rejets directs sans traitement par déversoirs d'orage	FR040000122278	0	133413	48.5135	-2.76139	SAINT-BRIEUC	FRH01	0.000512573	7.65791e-05
Estimated	DEAG_SL242		133300	49.2114	7.02695	KA BREBACH	44166	0.000512139	7.65142e-05
Calculation which includes resident population, economic activities, tourism, seasonal changes (connected or not), industries discharging into networks/WWTP (max average weekly loads	ROAG_35740	0	133154	47.7444	26.6665	Botosani	RO212	0.000511578	7.64304e-05
Residenti+fluttuanti+reflui industriali in fognatura	IT1989017_01		133000	37.0637	15.273	SIRACUSA_CONSORTILE	ITG19	0.000510986	7.6342e-05
C	UKENNE_Agg000130		132674	53.679	-1.47057	WAKEFIELD (CALDER VALE)	UKE45	0.000509734	7.61549e-05
Stimato	IT01000000000064	0	132620	44.349	7.48713	CUNEO	ITC16	0.000509526	7.61239e-05
Calculated the sum of the data of the total wastewater load of the settlements constituting the agglomeration	HU-AGGL-AHW582		132530	47.3707	18.9302	Erd - Szennyvizelvezetesi Agglomeracio	HU120	0.00050918	7.60722e-05
ESTIMADO	ES7240380004010	0	132381	42.5395	-6.75064	BIERZO BAJO	ES413	0.000508608	7.59867e-05
C	UKENSO_Agg000030		132350	51.3076	0.465906	Maidstone and Aylesford	UKJ46	0.000508489	7.59689e-05
Based on the resident polulation, non-resident population and industrial waste water + seasonal changes	SE_AGGLO_1017		132000	55.7128	13.2	AGGLO_LUND	SE224	0.000507144	7.5768e-05
C	UKENMI_Agg000184		131895	52.7196	-2.57439	Telford	UKG21	0.000506741	7.57077e-05
Ausbaugröße mal durchschnittlicher Auslastungsgrad im Berichtsjahr	DEAG_BW2165100000012		131714	48.866	8.20925	Rastatt	DE124	0.000506045	7.56038e-05
C	UKNI_AGG00054		131142	55.052	-7.257	Londonderry	UKN10	0.000503848	7.52755e-05
C	UKENNW_Agg000068		131096	53.7961	-2.37161	Hyndburn	UKD46	0.000503671	7.52491e-05
Carga anual media	ES10460130001010	0	131050	39.5	-0.333838	ALBALAT DELS SORELLS, ALBORAYA, ALFARA DEL PATRIARCA, ALMSASSERA, BONREPOS I MIRAMBELL, FOIOS, GODELLA, MELIANA, MONCADA, ROCAFORT, TAVERNES BLANQUES, VALENCIA, VINALESA	ES523	0.000503494	7.52227e-05
C	UKENTH_Agg000013		130833	51.2919	-1.0262	Basingstoke, Wildmoor, Basingst	UKJ37	0.00050266	7.50981e-05
applied weighing factor: combined treated load from connected UWTTP's x 1.013	NLA21001	0	130512	51.4436	3.61452	RITTHEM	NL342	0.000501427	7.49139e-05
Estimated	DEAG_NW2529		130312	51.5867	7.64078	Kamen-Körnebach	DEA5C	0.000500659	7.47991e-05
Measured and estimated	IEAG_D0038	1	130231	53.2656	-6.16797	Shanganagh	IE061	0.000500348	7.47526e-05
resident population + non resident population + seasonal changes + industrial waste waterresident population	PLLE002		130230	50.7176	23.2524	Zamość	PL812	0.000500344	7.4752e-05
C	UKENNW_Agg000024		130176	53.8121	-2.26195	Burnley	UKD46	0.000500136	7.4721e-05
treatment capacity of plant as indication for generated load	ATAG_3-403		130000	48.0962	16.3302	Raum Mödling (Wiener Neudorf-Wiener Neudorf)	AT127	0.00049946	7.462e-05
General calculation scheme	PTAGL132		130000	38.8244	-9.09624	Loures/S. Joao da Talha	PT170	0.00049946	7.462e-05
DS	DK374	0	130000	55.7033	9.54291	VEJLE	DK042	0.00049946	7.462e-05
treatment capacity of plant as indication for generated load	ATAG_1-00000133		130000	46.9659	16.2582	Heiligenkreuz/Lafnitztal (Bez.Jennersdorf) Lafnitztal-Raabtal	AT113	0.00049946	7.462e-05
DS	DK403	0	130000	57.1213	8.63386	HANSTHOLM	DK050	0.00049946	7.462e-05
General calculation scheme	PTAGL036		130000	37.0878	-8.25527	Albufeira - Central	PT150	0.00049946	7.462e-05
DS	DK410	0	130000	56.952	8.7035	THISTED	DK050	0.00049946	7.462e-05
Estimated	DEAG_HE064140001401		130000	50.043	8.22233	Wiesbaden / Biebrich	DE714	0.00049946	7.462e-05
treatment capacity of plant as indication for generated load	ATAG_2-K1949374		130000	46.7796	13.519	Spittal/Drau (Millstätter See)	AT212	0.00049946	7.462e-05
Ausbaugröße mal durchschnittlicher Auslastungsgrad im Berichtsjahr	DEAG_BYM-K0089		129828	48.2252	11.8181	gku VE München-Ost	DE21A	0.000498799	7.45213e-05
Abitanti residenti censimento 2011 (Proiezione dei dati ISTAT comunali su base sezioni censuarie formanti l'agglomerato) + Fluttuanti (Proiezione dei dati ISTAT comunali su base sezioni censuarie formanti l'agglomerato) + dati A.E. industriali in fognatur	IT06000000000057	0	129771	46.4043	13.012	TOLMEZZO	ITH42	0.00049858	7.44886e-05
Metodologia di calcolo: Popolazione residente, presente, pendolare e in strutture alberghiere, abitanti in seconde abitazioni, servizi ristorazione, attività manifatturiere micro, attività manifatturiere medio grandi. Gli agglomerati sono stati individuat	IT160000000062		129356	41.3139	16.2815	BARLETTA	ITF48	0.000496986	7.42503e-05
Metodologia di calcolo: Popolazione residente, presente, pendolare e in strutture alberghiere, abitanti in seconde abitazioni, servizi ristorazione, attività manifatturiere micro, attività manifatturiere medio grandi. Gli agglomerati sono stati individuat	IT160000000112		129156	40.6324	17.9345	BRINDISI	ITF44	0.000496217	7.41355e-05
General calculation scheme	PTAGL037		129000	37.1007	-8.30747	Armacao de Pera/Albufeira	PT150	0.000495618	7.4046e-05
resident population + non resident population + seasonal changes + industrial waste waterresident population	PLMZ006		128999	52.5452	19.6846	Płock	PL923	0.000495614	7.40454e-05
Residenti + Turisti di punta + AE produttivi in fognatura	IT08000000000037	1	128643	44.7676	10.8633	CARPI_CAMPOGALLIANO_CORREGGIO_SOLIERA	ITH54	0.000494246	7.38411e-05
ESTIMADO	ES1110270014010	0	128209	36.5735	-6.22126	PUERTO DE SANTA MARIA (EL)	ES612	0.000492579	7.3592e-05
SEGÚN ESQUEMA GENERAL DE CALCULO	ES13281480001010	0	128208	40.4335	-3.48196	TORREJÓN DE ARDOZ	ES300	0.000492575	7.35914e-05
Estimated	DEAG_NI102000201		128056	52.1882	10.3681	Salzgitter-Nord	DE912	0.000491991	7.35041e-05
Measured at the Malta North UWWTP	MTMN	0	128025	35.9681	14.3385	Malta North	MT001	0.000491872	7.34864e-05
To calculate pollution load from agglomeration, population, industries and other enterprises in this agglomeration, whose waste water is collected through collecting systems have been taken into account. Sewage, that is not collected through the collecting system yet, is also included. Total generated load of waste water discharges from industries that are separate from an urban waste water colle…	EERKA0440101		128016	59.394	27.258	Kohtla-Järve	EE007	0.000491837	7.34812e-05
applied weighing factor: combined treated load from connected UWTTP's x 1.013	NLA03022	0	127941	52.7312	6.88137	NIEUW AMSTERDAM	NL132	0.000491549	7.34381e-05
Sum of inhabitants and industry contributions expressed in PE60	SKA4030071		127900	48.33	18.06	Nitra	SK023	0.000491392	7.34146e-05
ESTIMADO	ES8451680001020	0	127500	39.871	-3.94957	SANTA MARIA DE BENQUERENCIA	ES425	0.000489855	7.3185e-05
applied weighing factor: combined treated load from connected UWTTP's x 1.013	NLA25023	0	127034	51.6746	4.85123	OOSTERHOUT	NL411	0.000488065	7.29175e-05
Carga anual media	ES10460170001000	0	126791	39.1106	-0.4878	ALZIRA, CARCAIXENT, LA POBLA LLARGA, VILLANUEVA DE CASTELLON	ES523	0.000487131	7.2778e-05
Population register data for 2018 + industrial wastewater estimate + estimated non-resident population	FIYKR12_T0873	0	126600	62.2474	25.7557	Jyvaskylan kt.	FI193	0.000486397	7.26684e-05
C	UKSC_Agg00115		126440	55.8639	-4.419	Paisley	UKM83	0.000485782	7.25766e-05
Estimated	DEAG_NW609		126364	51.1843	7.11998	Wuppertal-Kohlfurth	DEA19	0.00048549	7.25329e-05
General calculation scheme	PTAGL003		126000	37.014	-7.93296	Faro	PT150	0.000484092	7.2324e-05
General calculation scheme	PTAGL045		126000	37.0703	-8.10687	Vilamoura/Quarteira	PT150	0.000484092	7.2324e-05
Berechnet	DEAG_HB15-1		126000	53.1968	8.52115	Stadtgemeinde Bremen	DE501	0.000484092	7.2324e-05
applied weighing factor: combined treated load from connected UWTTP's x 1.013	NLA02011	0	125950	53.1951	5.8286	LEEUWARDEN	NL124	0.0004839	7.22953e-05
ESTIMADO	ES11100370001010	0	125800	39.4737	-6.3728	CACERES	ES432	0.000483324	7.22092e-05
C	UKENMI_Agg000225		125613	52.2635	-1.59747	Warwick	UKG13	0.000482605	7.21019e-05
Abitanti residenti censimento 2011 (Proiezione dei dati ISTAT comunali su base sezioni censuarie formanti l'agglomerato) + Fluttuanti (Proiezione dei dati ISTAT comunali su base sezioni censuarie formanti l'agglomerato) + dati A.E. industriali in fognatur	IT06Q13000000057	0	125362	46.0594	13.2431	UDINE	ITH42	0.000481641	7.19578e-05
C	UKENTH_Agg000145		125276	51.4941	-0.881311	Wargrave	UKJ11	0.00048131	7.19084e-05
General calculation scheme	PTAGL054		125100	39.7444	-8.81393	Leiria	PT16F	0.000480634	7.18074e-05
DS	DK288	0	125000	55.6497	12.057	BJERGMARKEN	DK022	0.00048025	7.175e-05
DS	DK372	0	125000	55.4841	9.65636	KOLDING	DK032	0.00048025	7.175e-05
Sum of inhabitants and industry contributions expressed in PE60	SKA5110137		125000	49.23	18.75	Zilina	SK031	0.00048025	7.175e-05
Sum of inhabitants and industry contributions expressed in PE60	SKA5050120		125000	49.07	19.64	Liptovsky Mikulas	SK031	0.00048025	7.175e-05
DS	DK406	0	125000	56.8105	8.8644	NYKØBING MORS	DK050	0.00048025	7.175e-05
treatment capacity of plant as indication for generated load	ATAG_5-A1779244R157		125000	47.4386	13.2109	Pfarrwerfen (Salzach-Pongau)	AT322	0.00048025	7.175e-05
ESTIMADO	ES4070260001010	0	125000	38.9102	1.42738	EIVISSA	ES533	0.00048025	7.175e-05
treatment capacity of plant as indication for generated load	ATAG_5-A1777733R157		125000	47.387	13.4954	Radstadt (Salzburger Ennstal)	AT322	0.00048025	7.175e-05
(PROMEDIO ANUAL CAUDAL TRATADO(M3/D)* PROMEDIO ANUAL DE CONCENTRACIÃ“N DBO5 (MG/L) DEL INFLUENTE) / 60	ES9251200006050	0	124876	41.6185	0.62492	LLEIDA	ES513	0.000479774	7.16788e-05
ESTIMADO	ES1180170001010	0	124700	36.7351	-3.6897	ALMUÑECAR	ES614	0.000479097	7.15778e-05
il carico generato totale è la somma del carico generato dai residenti, dai fluttuanti e dai produttivi	IT05000000000081		124370	45.726	11.918	CASTELFRANCO_VENETO	ITH34	0.00047783	7.13884e-05
Charge moyenne maximale hebdomadaire qui pénètre dans la station d'épuration au cours de l'année, à l'exclusion des situations inhabituelles comme celles qui sont dues à de fortes précipitations + rejets directs sans traitement par déversoirs d'orage	FR050000181065	0	124197	43.6203	2.23179	CASTRES-MÉLOU	FRJ27	0.000477165	7.12891e-05
C	UKENNE_Agg000179		124008	53.2674	-1.41329	Chesterfield	UKF12	0.000476439	7.11806e-05
Based on the resident polulation, non-resident population and industrial waste water + seasonal changes	SE_AGGLO_1046		124000	56.9028	12.4957	AGGLO_FALKENBERG	SE231	0.000476408	7.1176e-05
C	UKENNE_Agg000046		123707	54.6413	-1.19598	Hartlepool	UKC11	0.000475282	7.10078e-05
C	UKENAN_Agg000303		123660	51.5879	0.50595	Basildon	UKH37	0.000475102	7.09808e-05
Charge moyenne maximale hebdomadaire qui pénètre dans la station d'épuration au cours de l'année, à l'exclusion des situations inhabituelles comme celles qui sont dues à de fortes précipitations + rejets directs sans traitement par déversoirs d'orage	FR030000228085	0	123622	48.4537	1.50653	CHARTRES-2	FRB02	0.000474956	7.0959e-05
resident population + non resident population + seasonal changes + industrial waste waterresident population	PLWM003		123549	53.8252	22.3482	Ełk	PL623	0.000474675	7.09171e-05
Charge moyenne maximale hebdomadaire qui pénètre dans la station d'épuration au cours de l'année, à l'exclusion des situations inhabituelles comme celles qui sont dues à de fortes précipitations + rejets directs sans traitement par déversoirs d'orage	FR060000134032	0	123445	43.3547	3.25002	BEZIERS	FRJ13	0.000474276	7.08574e-05
Residenti + Turisti di punta + AE produttivi in fognatura	IT08000000000077	1	123379	44.8432	11.6051	FERRARA	ITH56	0.000474022	7.08195e-05
Charge moyenne maximale hebdomadaire qui pénètre dans la station d'épuration au cours de l'année, à l'exclusion des situations inhabituelles comme celles qui sont dues à de fortes précipitations + rejets directs sans traitement par déversoirs d'orage	FR060000183061	0	123362	43.4624	6.7631	FREJUS	FRL05	0.000473957	7.08098e-05
DS	DK408	0	123000	56.5689	9.0307	SKIVE	DK041	0.000472566	7.0602e-05
C	UKENMI_Agg000176		122442	52.5412	-1.95869	BIRMINGHAM & BLACK COUNTRY NO. 2 (RAY HALL)	UKG37	0.000470422	7.02817e-05
Calculation which includes resident population, economic activities, tourism, seasonal changes (connected or not), industries discharging into networks/WWTP (max average weekly loads), IAS	ROAG_146272	0	122396	47.6472	26.2592	Suceava	RO215	0.000470245	7.02553e-05
Calculated the sum of the data of the total wastewater load of the settlements constituting the agglomeration	HU-AGGL-AHX552		122259	47.1276	17.9157	Veszprem - Szennyvizelvezetesi Agglomeracio	HU213	0.000469719	7.01767e-05
C	UKWAWA_Agg000115		122194	53.0272	-2.94978	Dee	UKL23	0.000469469	7.01394e-05
Based on the resident polulation, non-resident population and industrial waste water + seasonal changes	SE_AGGLO_1014		122000	60.6897	17.1222	AGGLO_GAEVLE	SE313	0.000468724	7.0028e-05
Based on the resident polulation, non-resident population and industrial waste water + seasonal changes	SE_AGGLO_1018		122000	59.3677	16.5027	AGGLO_ESKILSTUNA	SE122	0.000468724	7.0028e-05
Based on the resident polulation, non-resident population and industrial waste water + seasonal changes	SE_AGGLO_1012		122000	57.7283	12.9385	AGGLO_BORAAS	SE232	0.000468724	7.0028e-05
stima riferita ai dati ISTAT ATU del 2009 (Abitanti totali Urbani)	IT090000000084		121922	43.7069	10.4009	PISA	ITI17	0.000468424	6.99832e-05
The general calculation scheme, ref NS9426	NO-08-001		121900	59.1283	9.65242	Porsgrunn/Skien	NO03	0.00046834	6.99706e-05
POBLACION RESIDENTE. POBLACION ESTACIONAL Y CARGA INDUSTRIAL	ES12360551201010	0	121420	42.049	-8.64207	TUI	ES114	0.000466496	6.96951e-05
resident population + non resident population + seasonal changes + industrial waste waterresident population	PLSL013		121198	50.331	19.2062	Dąbrowa Górnicza	PL22B	0.000465643	6.95677e-05
Charge moyenne maximale hebdomadaire qui pénètre dans la station d'épuration au cours de l'année, à l'exclusion des situations inhabituelles comme celles qui sont dues à de fortes précipitations + rejets directs sans traitement par déversoirs d'orage	FR030000177288	0	121017	48.5443	2.66423	MELUN	FR102	0.000464947	6.94638e-05
popolazione stanziale + popolazione fluttuante + popolazione industriale	IT03160121000018		120948	45.425	9.1115	AG01501101_ASSAGO	ITC4C	0.000464682	6.94242e-05
Estimated	DEAG_NW2781		120892	52.3232	8.61994	Lübbecke	DEA46	0.000464467	6.9392e-05
C	UKENTH_Agg000010		120833	51.8267	-0.855243	Aylesbury	UKJ13	0.00046424	6.93581e-05
Estimated	DEAG_NW940		120779	51.4044	7.07893	Essen-Süd	DEA13	0.000464033	6.93271e-05
il carico generato totale è la somma del carico generato dai residenti, dai fluttuanti e dai produttivi	IT05000000000113		120577	45.52	12.654	IESOLO	ITH35	0.000463257	6.92112e-05
The method was based on permanent population data (census 2011) supplemented by seasonal population (principally on the basis of accommodation facilities) and wherever applicable industrial contribution. In some cases the above findings were verified with the aid of the number of water meters indicative of the number of households, commercial facilities etc, served and on the basis of appropriate…	EL43400101	0	120500	35.5111	24.0223	CHANIA	EL434	0.000462961	6.9167e-05
Calculation which includes resident population, economic activities, tourism, seasonal changes (connected or not), industries discharging into networks/WWTP (max average weekly loads)	ROAG_167482	0	120274	45.065	24.343	Ramnicu Valcea	RO415	0.000462093	6.90373e-05
Carga anual media	ES10461310002010	0	120207	38.9801	-0.16316	ALMOINES, BELLREGUARD, BENIARJO, BENIFLA, BENIRREDRA , DAIMUS, GANDIA, GUARDAMAR DE LA SAFOR, L'ALQUERIA DE LA COMTESSA, LA FONT D'EN CARROS, MIRAMAR, PALMERA, PILES, POTRIES, RAFELCOFER, REAL DE GANDIA, VILLALONGA	ES523	0.000461835	6.89988e-05
Charge moyenne maximale hebdomadaire qui pénètre dans la station d'épuration au cours de l'année, à l'exclusion des situations inhabituelles comme celles qui sont dues à de fortes précipitations + rejets directs sans traitement par déversoirs d'orage	FR040000118033	0	120138	47.0845	2.40427	BOURGES	FRB01	0.00046157	6.89592e-05
popolazione stanziale + popolazione fluttuante + popolazione industriale	IT03160121000122	1	120000	45.5195	9.61425	AG01614201_MOZZANICA	ITC46	0.00046104	6.888e-05
treatment capacity of plant as indication for generated load	ATAG_7-7309302		120000	47.3051	11.6085	Fritzens (Hall/Tirol-Fritzens)	AT332	0.00046104	6.888e-05
treatment capacity of plant as indication for generated load	ATAG_6-M3223510R0		120000	46.879	15.5305	Wildon - Grazerfeld	AT225	0.00046104	6.888e-05
The method was based on permanent population data (census 2011) supplemented by seasonal population (principally on the basis of accommodation facilities) and wherever applicable industrial contribution. In some cases the above findings were verified with the aid of the number of water meters indicative of the number of households, commercial facilities etc, served and on the basis of appropriate…	EL12500101	0	120000	40.2713	22.5041	KATERINI	EL525	0.00046104	6.888e-05
treatment capacity of plant as indication for generated load	ATAG_2-K1702940R0		120000	46.7368	14.846	St.Andrä/Lavanttal (Mittleres Lavanttal)	AT213	0.00046104	6.888e-05
Based on the resident polulation, non-resident population and industrial waste water + seasonal changes	SE_AGGLO_1035		120000	57.1086	12.2707	AGGLO_VARBERG	SE231	0.00046104	6.888e-05
ESTIMADO	ES4070110012010	0	120000	39.5073	2.50604	SANTA PONÇA	ES533	0.00046104	6.888e-05
ESTIMADO	ES1230500009010	0	120000	37.7728	-3.7916	JAEN	ES616	0.00046104	6.888e-05
C	UKNI_AGG00087		119810	54.47	-6.411	Ballynacor	UKN07	0.00046031	6.87709e-05
Estimated	DEAG_TH8561		119519	51.0437	12.445	Altenburg/Rositz	DEG0M	0.000459192	6.86039e-05
E	UKENSW_Agg000058		119442	50.3669	-4.11363	Plymouth Central	UKK41	0.000458896	6.85597e-05
resident population + non resident population + seasonal changes + industrial waste waterresident population	PLPL003		119381	53.1788	22.0823	Łomża	PL842	0.000458662	6.85247e-05
Measured and estimated	IEAG_D0022	1	119309	52.2523	-7.11045	Waterford city	IE052	0.000458385	6.84834e-05
applied weighing factor: combined treated load from connected UWTTP's x 1.013	NLA05019	0	119297	52.3659	6.6502	ALMELO	NL213	0.000458339	6.84765e-05
To calculate pollution load from agglomeration, population, industries and other enterprises in this agglomeration, whose waste water is collected through collecting systems have been taken into account. Sewage, that is not collected through the collecting system yet, is also included. Total generated load of waste water discharges from industries that are separate from an urban waste water colle…	EERKA0780420		119290	58.362	26.725	Tartu	EE008	0.000458312	6.84725e-05
resident population + non resident population + seasonal changes + industrial waste waterresident population	PLDO009		119168	51.2065	16.1623	Legnica	PL516	0.000457843	6.84024e-05
Estimated	DEAG_NI456015201		119109	52.4455	7.04542	Nordhorn	DE94B	0.000457617	6.83686e-05
Popolazione residente - Abitanti case sparse + Pop. Fluttuante + Carico industriale servito da impianti misti	IT150000000014	0	118977	40.9111	14.8268	AVELLINO	ITF34	0.00045711	6.82928e-05
Calculated the sum of the data of the total wastewater load of the settlements constituting the agglomeration	HU-AGGL-AHW552		118921	47.6338	19.1384	Dunakeszi - Szennyvizelvezetesi Agglomeracio	HU120	0.000456894	6.82607e-05
Residenti + Turisti di punta + AE produttivi in fognatura	IT08000000000059	1	118856	44.1851	12.3836	CESENATICO	ITH58	0.000456645	6.82233e-05
Calculation which includes resident population, economic activities, tourism, seasonal changes (connected or not), industries discharging into networks/WWWTP (max average weekly loads)	ROAG_131540	0	118814	45.3456	25.5496	Sinaia	RO316	0.000456483	6.81992e-05
Ausbaugröße mal durchschnittlicher Auslastungsgrad im Berichtsjahr	DEAG_BYKE-K0112		118801	48.0529	10.1439	Memmingen	DE274	0.000456433	6.81918e-05
Charge moyenne maximale hebdomadaire qui pénètre dans la station d'épuration au cours de l'année, à l'exclusion des situations inhabituelles comme celles qui sont dues à de fortes précipitations + rejets directs sans traitement par déversoirs d'orage	FR040000149099	0	118530	47.0455	-0.87748	CHOLET	FRG02	0.000455392	6.80362e-05
Popolazione residente - Abitanti case sparse + Pop. Fluttuante + Carico industriale servito da impianti misti	IT150000000024	0	118524	40.7418	14.5267	SCAFATI	ITF35	0.000455369	6.80328e-05
The method was based on permanent population data (census 2011) supplemented by seasonal population (principally on the basis of accommodation facilities) and wherever applicable industrial contribution. In some cases the above findings were verified with the aid of the number of water meters indicative of the number of households, commercial facilities etc, served and on the basis of appropriate…	EL21300101	0	118454	39.6684	20.8412	IOANNINA	EL543	0.0004551	6.79926e-05
Charge moyenne maximale hebdomadaire qui pénètre dans la station d'épuration au cours de l'année, à l'exclusion des situations inhabituelles comme celles qui sont dues à de fortes précipitations + rejets directs sans traitement par déversoirs d'orage	FR010000162498	0	118354	50.4418	2.81758	LENS	FRE12	0.000454716	6.79352e-05
C	UKENNW_Agg000046		118087	53.4724	-2.36781	Eccles	UKD34	0.00045369	6.77819e-05
E	CZAG598003		118067	49.6848	18.3506	Frydek - Mistek	CZ080	0.000453613	6.77705e-05
popolazione stanziale + popolazione fluttuante + popolazione industriale	IT03160121000229		117954	45.8044	9.25854	AG01314701_MERONE	ITC42	0.000453179	6.77056e-05
C	UKENAN_Agg000161		117892	53.2214	-0.505437	Lincoln	UKF30	0.000452941	6.767e-05
resident population + non resident population + seasonal changes + industrial waste waterresident population	PLZA103N		117785	53.4383	14.5431	Szczecin Prawobrzeże	PL424	0.00045253	6.76086e-05
resident population + non resident population + seasonal changes + industrial waste waterresident population	PLMP023		117767	49.9681	20.6132	Brzesko	PL217	0.000452461	6.75983e-05
Estimated	DEAG_NI405000201		117733	53.5466	8.13887	Wilhelmshaven	DE945	0.00045233	6.75787e-05
Somma degli abitanti equivalenti serviti dall'impianto/i di depurazione e dalla/e imhoff presente/i nel agglomerato. Per quanto attiene i depuratori biologici sono ripresi dal "Piano provinciale di risanamento delle acque" approvato con deliberazione dell	IT220000000052	0	117629	46.0951	11.1329	TRENTO_NORD	ITH20	0.000451931	6.7519e-05
Residenti+fluttuanti+reflui industriali in fognatura	IT1982021_01		117565	38.1553	13.181	CARINI (ORA ASI CARINI)	ITG12	0.000451685	6.74823e-05
Measurement of load entering UWWTP (p.e)	ROAG_86990	0	117273	45.3902	23.4383	Petrosani	RO423	0.000450563	6.73147e-05
popolazione stanziale + popolazione fluttuante + popolazione industriale	IT03160121000356		117009	45.6703	9.9965	AG01713401_SEBINO_2_PARATICO	ITC47	0.000449549	6.71632e-05
DS	DK421	0	117000	57.5778	9.99236	HIRTSHALS	DK050	0.000449514	6.7158e-05
C	UKENAN_Agg000067		116941	52.4919	-0.668138	Corby	UKF25	0.000449287	6.71241e-05
Charge moyenne maximale hebdomadaire qui pénètre dans la station d'épuration au cours de l'année, à l'exclusion des situations inhabituelles comme celles qui sont dues à de fortes précipitations + rejets directs sans traitement par déversoirs d'orage	FR010000159178	0	116935	50.384	3.07847	DOUAI	FRE11	0.000449264	6.71207e-05
Il carico nominale del precedente questionario è stato diminuto per ridelimitazione dell'agglomerato	IT090000000183		116759	43.8296	10.5529	CAPANNORI	ITI12	0.000448588	6.70197e-05
il carico generato totale è la somma del carico generato dai residenti, dai fluttuanti e dai produttivi	IT05000000000045		116721	45.739	11.472	THIENE	ITH32	0.000448442	6.69979e-05
63	ES16200450002010	0	116581	43.3428	-1.79791	IRUN (HONDARRIBIA)	ES212	0.000447904	6.69175e-05
C	UKENNW_Agg000027		116547	54.8998	-2.95569	Carlisle	UKD12	0.000447774	6.6898e-05
C	UKENSO_Agg000093		116437	50.7845	0.325471	Eastbourne	UKJ22	0.000447351	6.68348e-05
SEGUN METODO GENERAL	ES13280790001016	0	116292	40.4954	-3.54666	MADRID VI (VALDEBEBAS)	ES300	0.000446794	6.67516e-05
(PROMEDIO ANUAL CAUDAL TRATADO(M3/D)* PROMEDIO ANUAL DE CONCENTRACIÃ“N DBO5 (MG/L) DEL INFLUENTE) / 60	ES9081050001010	0	116142	41.5152	2.19777	LLAGOSTA (LA)	ES511	0.000446218	6.66655e-05
Popolazione residente - Abitanti case sparse + Pop. Fluttuante + Carico industriale servito da impianti misti	IT150000000013	0	115987	40.6379	14.4084	VICO_EQUENSE	ITF33	0.000445622	6.65765e-05
E	UKENSW_Agg000089		115943	51.4122	-2.44282	Bath	UKK12	0.000445453	6.65513e-05
resident population + non resident population + seasonal changes + industrial waste waterresident population	PLKP004		115938	53.4937	18.7487	Grudziądz	PL616	0.000445434	6.65484e-05
Charge moyenne maximale hebdomadaire qui pénètre dans la station d'épuration au cours de l'année, à l'exclusion des situations inhabituelles comme celles qui sont dues à de fortes précipitations + rejets directs sans traitement par déversoirs d'orage	FR030000160338	0	115595	49.4046	2.85862	COMPIEGNE	FRE22	0.000444116	6.63515e-05
popolazione stanziale + popolazione fluttuante + popolazione industriale	IT03160121000131		115570	45.3681	9.69301	AG01903501_CREMA	ITC4A	0.00044402	6.63372e-05
#NAME?	BE_F_AG_009	0	115500	50.8257	3.30108	Harelbeke	BE254	0.000443751	6.6297e-05
Measured and estimated	IEAG_D0013	1	115360	52.6671	-8.633	Limerick	IE051	0.000443213	6.62166e-05
Charge moyenne maximale hebdomadaire qui pénètre dans la station d'épuration au cours de l'année, à l'exclusion des situations inhabituelles comme celles qui sont dues à de fortes précipitations + rejets directs sans traitement par déversoirs d'orage	FR010000162193	0	115310	50.9559	1.87238	CALAIS-MARCK	FRE12	0.000443021	6.61879e-05
C	UKWAWA_Agg000101		115263	53.193	-2.90893	CHESTER	UKD63	0.00044284	6.6161e-05
C	UKSC_Agg00068		115185	55.8983	-3.473	Livingston	UKM78	0.000442541	6.61162e-05
Estimated	DEAG_NW931		115000	51.656	6.60532	Wesel	DEA1F	0.00044183	6.601e-05
DS	DK342	0	115000	55.4167	11.3427	SLAGELSE	DK022	0.00044183	6.601e-05
C	UKENNW_Agg000142		114971	53.4793	-2.31141	Salford	UKD34	0.000441719	6.59934e-05
Charge moyenne maximale hebdomadaire qui pénètre dans la station d'épuration au cours de l'année, à l'exclusion des situations inhabituelles comme celles qui sont dues à de fortes précipitations + rejets directs sans traitement par déversoirs d'orage	FR040000136044	0	114901	46.8057	1.70122	CHATEAUROUX	FRB03	0.00044145	6.59532e-05
il carico generato totale è la somma del carico generato dai residenti, dai fluttuanti e dai produttivi	IT05Q90000001756		114895	45.648	13.035	BIBIONE	ITH35	0.000441427	6.59497e-05
Residenti+fluttuanti+reflui industriali in fognatura	IT1981021_01		114855	37.9911	12.5405	TRAPANI	ITG11	0.000441273	6.59268e-05
stima riferita al carico organico dell'impianto	IT090000000178		114814	43.85	10.4726	LUCCA	ITI12	0.000441115	6.59032e-05
Charge moyenne maximale hebdomadaire qui pénètre dans la station d'épuration au cours de l'année, à l'exclusion des situations inhabituelles comme celles qui sont dues à de fortes précipitations + rejets directs sans traitement par déversoirs d'orage	FR030000114715	0	114596	49.3749	0.108293	TROUVILLE-SUR-MER	FRD11	0.000440278	6.57781e-05
ESQUEMA GENERAL DE CALCULO	ES18510010000000	0	114595	35.8894	-5.34084	CEUTA	ES630	0.000440274	6.57775e-05
Ausbaugröße mal durchschnittlicher Auslastungsgrad im Berichtsjahr	DEAG_BW1275100000014		114520	49.1369	10.0583	Crailsheim	DE11A	0.000439986	6.57345e-05
C	UKENSO_Agg000028		114267	51.1134	1.26433	Dover / Folkstone	UKJ44	0.000439014	6.55893e-05
calculated	BGAG10447_00		114188	43.0787	25.6283	Veliko Tarnovo	BG321	0.00043871	6.55439e-05
C	UKENNE_Agg000121		114051	53.4446	-1.33065	Rotherham (Aldwarke)	UKE31	0.000438184	6.54653e-05
MEDIDO	ES2221250008010	0	114016	42.1385	-0.40768	HUESCA	ES241	0.000438049	6.54452e-05
In Wallonia, the load generated by an inhabitant has been determined at 54 g BOD/day in accordance with a scientific study conducted by CEBEDEAU. So, 1 inhabitant = 0,9 PE. Moreover, the population is determined on the basis of the cadastral reference	BERW09001	0	114000	50.4592	4.85182	NAMUR	BE352	0.000437988	6.5436e-05
C	UKENMI_Agg000241		113905	52.1787	-2.22635	Worcester	UKG12	0.000437623	6.53815e-05
C	UKENTH_Agg000063		113887	51.3817	-0.370471	Esher	UKJ25	0.000437554	6.53711e-05
To calculate pollution load from agglomeration, population, industries and other enterprises in this agglomeration, whose waste water is collected through collecting systems have been taken into account. Sewage, that is not collected through the collecting system yet, is also included. Total generated load of waste water discharges from industries that are separate from an urban waste water colle…	EERKA0590247		113865	59.349	26.371	Rakvere	EE006	0.000437469	6.53585e-05
resident population + non resident population + seasonal changes + industrial waste waterresident population	PLKP003		113819	52.6535	19.0703	Włocławek	PL619	0.000437293	6.53321e-05
popolazione stanziale + popolazione fluttuante + popolazione industriale	IT03160121000278		113732	45.208	9.15673	AG01811001_PAVIA	ITC48	0.000436958	6.52822e-05
General calculation scheme	PTAGL021		113500	38.6436	-9.1023	Seixal	PT170	0.000436067	6.5149e-05
popolazione stanziale + popolazione fluttuante + popolazione industriale	IT03160121000072		113411	45.6624	9.04457	AG01203401_CARONNO_PERTUSELLA	ITC41	0.000435725	6.50979e-05
E	CZAG555134		113395	50.043	15.767	Pardubice	CZ053	0.000435664	6.50887e-05
C	UKNI_AGG00014		113312	54.84	-6.304	Ballymena	UKN15	0.000435345	6.50411e-05
Calculated the sum of the data of the total wastewater load of the settlements constituting the agglomeration	HU-AGGL-AHX379		113300	47.1733	20.1851	Szolnok - Szennyvizelvezetesi Agglomeracio	HU322	0.000435299	6.50342e-05
Estimated	DEAG_NI361012201		112892	52.938	9.22205	Verden	DE93B	0.000433731	6.48e-05
Ausbaugröße mal durchschnittlicher Auslastungsgrad im Berichtsjahr	DEAG_BYRO-K0001		112887	47.8762	12.1299	Rosenheim	DE213	0.000433712	6.47971e-05
Charge moyenne maximale hebdomadaire qui pénètre dans la station d'épuration au cours de l'année, à l'exclusion des situations inhabituelles comme celles qui sont dues à de fortes précipitations + rejets directs sans traitement par déversoirs d'orage	FR010000159220	0	112805	50.5975	3.07237	FACHES-THUMESNIL	FRE11	0.000433397	6.47501e-05
Estimated	DEAG_NW329		112689	51.8689	8.29874	Rheda-Wiedenbrück, Rheda	DEA42	0.000432951	6.46835e-05
Charge moyenne maximale hebdomadaire qui pénètre dans la station d'épuration au cours de l'année, à l'exclusion des situations inhabituelles comme celles qui sont dues à de fortes précipitations + rejets directs sans traitement par déversoirs d'orage	FR060000174012	0	112516	46.1905	6.23793	ANNEMASSE	FRK28	0.000432286	6.45842e-05
C	UKENMI_Agg000120		112510	52.3615	-2.25754	Kidderminster	UKG12	0.000432263	6.45807e-05
resident population + non resident population + seasonal changes + industrial waste waterresident population	PLMP004		112306	49.4853	20.0331	Nowy Targ	PL219	0.00043148	6.44636e-05
CALCULADO	ES13280920001011	0	112216	40.2936	-3.88326	MOSTOLES II (LA REGUERA)	ES300	0.000431134	6.4412e-05
Numero di abitanti equivalenti medi (num residenti+presenze turistiche di punta+produttivi in fognatura)	IT02160635000001		111870	45.7313	7.3061	AOSTA	ITC20	0.000429805	6.42134e-05
Estimated	DEAG_NW301		111867	52.0434	8.59928	Bielefeld, Heepen	DEA41	0.000429793	6.42117e-05
resident population + non resident population + seasonal changes + industrial waste waterresident population	PLLE003		111857	51.1339	23.4693	Chełm	PL812	0.000429755	6.42059e-05
Calculation which includes resident population, economic activities, tourism, seasonal changes (connected or not), industries discharging into networks/WWWTP (max average weekly loads)	ROAG_65342	0	111817	44.922	25.4565	Targoviste	RO313	0.000429601	6.4183e-05
calculated	BGAG56722_00		111507	43.4132	24.6169	Pleven	BG314	0.00042841	6.4005e-05
Calculated the sum of the data of the total wastewater load of the settlements constituting the agglomeration	HU-AGGL-AHY896		111193	46.8403	16.8366	Zalaegerszeg - Szennyvizelvezetesi Agglomeracio	HU223	0.000427204	6.38248e-05
Abitanti residenti censimento 2011 (Proiezione dei dati ISTAT comunali su base sezioni censuarie formanti l'agglomerato) + Fluttuanti (Proiezione dei dati ISTAT comunali su base sezioni censuarie formanti l'agglomerato) + dati A.E. industriali in fognatur	IT06Q13000000016	0	111078	45.8227	13.2804	CERVIGNANO_TORVISCOSA	ITH42	0.000426762	6.37588e-05
popolazione stanziale + popolazione fluttuante + popolazione industriale	IT03160121000085		111069	45.5819	9.49035	AG01505901_CASSANO_D_ADDA	ITC4C	0.000426727	6.37536e-05
C	UKENAN_Agg000115		110960	52.6395	1.72112	Great Yarmouth	UKH15	0.000426308	6.3691e-05
Calculated the sum of the data of the total wastewater load of the settlements constituting the agglomeration	HU-AGGL-AHX516		110907	47.8198	19.1078	Vac - Szennyvizelvezetesi Agglomeracio	HU120	0.000426105	6.36606e-05
(PROMEDIO ANUAL CAUDAL TRATADO(M3/D)* PROMEDIO ANUAL DE CONCENTRACIÃ“N DBO5 (MG/L) DEL INFLUENTE) / 60	ES9081840001010	0	110899	41.4931	2.02892	RUBI	ES511	0.000426074	6.3656e-05
calculated (JAM * Konzentration=t/a)	DEAG_MV54.43.1 wbu335		110741	53.4258	11.1773	Hagenow	DE80O	0.000425467	6.35653e-05
Charge moyenne maximale hebdomadaire qui pénètre dans la station d'épuration au cours de l'année, à l'exclusion des situations inhabituelles comme celles qui sont dues à de fortes précipitations + rejets directs sans traitement par déversoirs d'orage	FR020000167462	0	110717	48.2546	7.46379	SELESTAT	FRF11	0.000425375	6.35516e-05
resident population + non resident population + seasonal changes + industrial waste waterresident population	PLMZ009		110400	52.0737	21.0278	Piaseczno	PL913	0.000424157	6.33696e-05
ESTIMADO	ES1110220001010	0	110368	36.1766	-5.34578	LINEA DE LA CONCEPCION (LA)	ES612	0.000424034	6.33512e-05
Metodologia di calcolo: Popolazione residente, presente, pendolare e in strutture alberghiere, abitanti in seconde abitazioni, servizi ristorazione, attività manifatturiere micro, attività manifatturiere medio grandi. Gli agglomerati sono stati individuat	IT160000000147		110263	40.1145	18.3032	MAGLIE	ITF45	0.00042363	6.3291e-05
C	UKENMI_Agg000100		110180	52.6151	-1.9691	Walsall South	UKG38	0.000423312	6.32433e-05
General calculation scheme	PTAGL107		110000	41.2329	-8.62877	Parada	PT11A	0.00042262	6.314e-05
DS	DK291	0	110000	55.246	12.1089	FAKSE	DK022	0.00042262	6.314e-05
Residenti+Turisti di punta+AE produttivi in fognatura (Elaborazione ATO su dati ISTAT 2005)	IT18Q90000001647		110000	38.8892	16.6027	Catanzaro	ITF63	0.00042262	6.314e-05
treatment capacity of plant as indication for generated load	ATAG_1-00000074		110000	47.8006	16.5173	Wulkaprodersdorf (Wulkatal)	AT112	0.00042262	6.314e-05
The general calculation scheme, ref NS9426	NO-01-014		110000	59.4283	10.7181	Moss	NO03	0.00042262	6.314e-05
Residenti+Fluttuanti+AE produttivi in fognatura (Fonte: Comune 2012)	IT18Q90000001649		110000	38.9374	16.2777	Lamezia Terme	ITF63	0.00042262	6.314e-05
(PROMEDIO ANUAL CAUDAL TRATADO(M3/D)* PROMEDIO ANUAL DE CONCENTRACIÃ“N DBO5 (MG/L) DEL INFLUENTE) / 60	ES9431230006010	0	109927	41.1566	1.10586	REUS	ES514	0.00042234	6.30981e-05
Ausbaugröße mal durchschnittlicher Auslastungsgrad im Berichtsjahr	DEAG_BW3365100000001		109786	47.6113	7.66552	Wieseverband	DE139	0.000421798	6.30172e-05
ESTIMADO	ES1181400003010	0	109734	36.7497	-3.54226	MOTRIL-SALOBREÑA	ES614	0.000421598	6.29873e-05
Ausbaugröße mal durchschnittlicher Auslastungsgrad im Berichtsjahr	DEAG_BW1185100000005		109690	48.9573	9.1375	Bietigheim-Bissingen,Nesselwörth	DE115	0.000421429	6.29621e-05
treatment capacity of plant as indication for generated load	ATAG_3-447		109683	47.8909	15.984	Raum Pernitz (Oberes Piestingtal)	AT122	0.000421402	6.2958e-05
Ausbaugröße mal durchschnittlicher Auslastungsgrad im Berichtsjahr	DEAG_BB30		109594	51.7734	14.3512	Cottbus	DE402	0.00042106	6.2907e-05
Calculated the sum of the data of the total wastewater load of the settlements constituting the agglomeration	HU-AGGL-AHX414		109520	47.5535	18.424	Tatabanya - Szennyvizelvezetesi Agglomeracio	HU212	0.000420776	6.28645e-05
popolazione stanziale + popolazione fluttuante + popolazione industriale	IT03160121000133		109427	45.1466	10.0154	AG01903604_CREMONA	ITC4A	0.000420419	6.28111e-05
resident population + non resident population + seasonal changes + industrial waste waterresident population	PLMZ008		109409	52.104	21.2683	Otwock	PL912	0.000420349	6.28008e-05
ESTIMADO	ES14300240004010	0	109245	37.6756	-1.69427	LORCA	ES620	0.000419719	6.27066e-05
La consistenza nominale è stata calcolata per residenti e fluttuanti, partendo dai dati ISTAT 2001, dettagliando il dato spaziale con la tecnica del Dasymetric Mapping (tecnica statistica che permette di dettagliare la densità della popolazione sul	IT100000000025	0	109149	42.5618	12.6386	TERNI	ITI22	0.00041935	6.26515e-05
Estimated	DEAG_NW1801		109016	50.71	7.1492	Bonn Bad Godesberg	DEA22	0.000418839	6.25752e-05
applied weighing factor: combined treated load from connected UWTTP's x 1.013	NLA12010	0	108969	52.4301	4.85823	ZAANDAM	NL325	0.000418659	6.25482e-05
resident population + non resident population + seasonal changes + industrial waste waterresident population	PLLO004		108647	51.531	20.0119	TOMASZÓW MAZOWIECKI	PL713	0.000417422	6.23634e-05
Charge moyenne maximale hebdomadaire qui pénètre dans la station d'épuration au cours de l'année, à l'exclusion des situations inhabituelles comme celles qui sont dues à de fortes précipitations + rejets directs sans traitement par déversoirs d'orage	FR060000121054	0	108480	47.0312	4.83007	BEAUNE- COMBERTAULT	FRC11	0.00041678	6.22675e-05
C	UKENNW_Agg000047		108421	53.2628	-2.86591	Ellesmere Port	UKD63	0.000416553	6.22337e-05
Estimated	DEAG_NW1817		108223	50.9143	7.65255	Bergheim Kenten	DEA27	0.000415793	6.212e-05
Ausbaugröße mal durchschnittlicher Auslastungsgrad im Berichtsjahr	DEAG_BYKC-K0083		108000	50.2408	10.9695	Coburg	DE243	0.000414936	6.1992e-05
Estimated	DEAG_NW901		108000	51.374	6.74071	Duisburg-Huckingen	DEA12	0.000414936	6.1992e-05
treatment capacity of plant as indication for generated load	ATAG_8-Ludesch		108000	47.1746	9.77011	Ludesch (Region Bludenz)	AT341	0.000414936	6.1992e-05
calculated	BGAG72624_00		107809	43.5622	27.8319	Dobrich	BG332	0.000414202	6.18824e-05
Ausbaugröße mal durchschnittlicher Auslastungsgrad im Berichtsjahr	DEAG_BYR-K0098		107802	49.301	11.4673	Neumarkt/Opf.	DE236	0.000414175	6.18783e-05
Popolazione residente - Abitanti case sparse + Pop. Fluttuante + Carico industriale servito da impianti misti	IT150000000026	0	107758	40.7588	14.6936	NOCERA_SUPERIORE	ITF35	0.000414006	6.18531e-05
Carga anual media	ES10030660001010	0	107612	38.4518	-0.801969	ELDA, MONOVER, PETRER, SAX	ES521	0.000413445	6.17693e-05
Ausbaugröße mal durchschnittlicher Auslastungsgrad im Berichtsjahr	DEAG_BW2155100000035		107483	49.0371	8.69951	Weißach- und Oberes Saalbachtal	DE123	0.00041295	6.16952e-05
applied weighing factor: combined treated load from connected UWTTP's x 1.013	NLA13005	0	107479	52.3616	4.73975	ZWANENBURG	NL329	0.000412934	6.16929e-05
Charge moyenne maximale hebdomadaire qui pénètre dans la station d'épuration au cours de l'année, à l'exclusion des situations inhabituelles comme celles qui sont dues à de fortes précipitations + rejets directs sans traitement par déversoirs d'orage	FR030000191174	0	107423	48.6008	2.46926	CORBEIL-ESSONNES	FR104	0.000412719	6.16608e-05
Charge moyenne maximale hebdomadaire qui pénètre dans la station d'épuration au cours de l'année, à l'exclusion des situations inhabituelles comme celles qui sont dues à de fortes précipitations + rejets directs sans traitement par déversoirs d'orage	FR040000244184	0	107230	47.2741	-2.2422	SAINT-NAZAIRE - AGGLOMERATION OUEST	FRG01	0.000411978	6.155e-05
C	UKENNE_Agg000051		107189	54.4983	-1.555	Darlington	UKC13	0.00041182	6.15265e-05
Einwohnerzahl + Einwohnergleichwerte im gemeindl. Gebiet	DEAG_ST153631000004		107150	52.6103	11.9052	Stendal	DEE0D	0.00041167	6.15041e-05
Calculation which includes resident population, economic activities, tourism, seasonal changes (connected or not), industries discharging into networks/WWTP (max average weekly loads)	ROAG_109773	0	107043	44.6328	22.6582	Drobeta –Turnu Severin	RO413	0.000411259	6.14427e-05
ESTIMADO	ES8160780003010	0	107000	40.0698	-2.13539	CUENCA	ES423	0.000411094	6.1418e-05
(PROMEDIO ANUAL CAUDAL TRATADO(M3/D)* PROMEDIO ANUAL DE CONCENTRACIÃ“N DBO5 (MG/L) DEL INFLUENTE) / 60	ES9081870001010	0	106901	41.546	2.10528	SABADELL-RIU SEC	ES511	0.000410714	6.13612e-05
Residenti + Turisti di punta + AE produttivi in fognatura	IT08000000000137	1	106886	45.038	9.70784	PIACENZA	ITH51	0.000410656	6.13526e-05
Measured and estimated	IEAG_D0050	1	106784	53.2779	-9.05143	Galway	IE042	0.000410264	6.1294e-05
resident population + non resident population + seasonal changes + industrial waste waterresident population	PLPK002		106752	49.6916	21.7674	Krosno	PL821	0.000410141	6.12756e-05
Estimated	DEAG_NW2742		106744	51.9466	8.85969	Detmold-Zentral	DEA45	0.00041011	6.12711e-05
CARACTERIZACION DE VERTIDOS DEL PROYECTO DE CONSTRUCCION	ES7401940006010	0	106664	40.9428	-4.11341	SEGOVIA Y SU ALFOZ	ES416	0.000409803	6.12251e-05
applied weighing factor: combined treated load from connected UWTTP's x 1.013	NLA04027	0	106635	52.686	5.68298	TOLLEBEEK	NL230	0.000409692	6.12085e-05
General calculation scheme	PTAGL040		106500	37.1003	-8.67552	Lagos	PT150	0.000409173	6.1131e-05
Calculation which Includes resident population, economic activities, tourism, seasonal changes (connected or not), industries discharging into networks/WWTP (max average weekly loads)	ROAG_136492	0	106497	47.7935	22.8839	Satu Mare	RO115	0.000409161	6.11293e-05
Estimated	DEAG_NW315		106441	51.9003	8.3362	Gütersloh, Putzhagen	DEA42	0.000408946	6.10971e-05
ESTIMADO	ES1290250001010	0	106415	36.6012	-4.53281	ARROYO DE LA MIEL	ES617	0.000408846	6.10822e-05
resident population + non resident population + seasonal changes + industrial waste waterresident population	PLSL015		106299	49.9528	18.6118	Jastrzębie-Zdrój	PL227	0.000408401	6.10156e-05
C	UKENSO_Agg000026		106298	51.1534	0.886355	Ashford	UKJ45	0.000408397	6.10151e-05
C	UKENMI_Agg000182		106246	52.383	-1.27536	Rugby Newbold	UKG13	0.000408197	6.09852e-05
treatment capacity of plant as indication for generated load	ATAG_4-40708001		106000	47.9421	13.8032	Gmunden und Umgebung	AT315	0.000407252	6.0844e-05
Ausbaugröße mal durchschnittlicher Auslastungsgrad im Berichtsjahr	DEAG_BW3175100000001		105989	48.4727	7.93789	Offenburg, Griesheim	DE134	0.00040721	6.08377e-05
resident population + non resident population + seasonal changes + industrial waste waterresident population	PLZA004		105687	53.3367	15.039	Stargard	PL428	0.000406049	6.06643e-05
C	UKENMI_Agg000194		105643	52.7177	-2.71442	Shrewsbury	UKG22	0.00040588	6.06391e-05
E	UKENSW_Agg000184		105475	51.3078	-2.98453	Weston Super Mare	UKK12	0.000405235	6.05426e-05
DRAFT CE del 16 gennaio 2007 (calcolo ottenuto dalla sommatoria dei residenti delle località/agglomerato, turisti, seconde case e scarico industriali in rete fognaria)	IT11000000000033	0	105282	43.5889	13.4961	ANCONA	ITI32	0.000404493	6.04319e-05
Charge moyenne maximale hebdomadaire qui pénètre dans la station d'épuration au cours de l'année, à l'exclusion des situations inhabituelles comme celles qui sont dues à de fortes précipitations + rejets directs sans traitement par déversoirs d'orage	FR040000103310	0	105265	46.1239	3.4251	VICHY	FRK11	0.000404428	6.04221e-05
Ausbaugröße mal durchschnittlicher Auslastungsgrad im Berichtsjahr	DEAG_BW4165100000066		105108	48.53	9.05962	Tübingen	DE142	0.000403825	6.0332e-05
Charge moyenne maximale hebdomadaire qui pénètre dans la station d'épuration au cours de l'année, à l'exclusion des situations inhabituelles comme celles qui sont dues à de fortes précipitations + rejets directs sans traitement par déversoirs d'orage	FR040000185194	0	105033	46.5026	-1.79422	CHATEAU-D'OLONNE - LES SABLES D'OLONNE	FRG05	0.000403537	6.02889e-05
treatment capacity of plant as indication for generated load	ATAG_3-34		105000	47.969	16.2424	Raum Bad Vöslau (Bad Vöslau-Vöslau)	AT127	0.00040341	6.027e-05
General calculation scheme	PTAGL393		105000	37.9526	-8.86441	Sines/Santo Andre	PT181	0.00040341	6.027e-05
Based on the resident polulation, non-resident population and industrial waste water + seasonal changes	SE_AGGLO_1023		105000	65.5912	22.1684	AGGLO_LULEAA	SE332	0.00040341	6.027e-05
DS	DK316	0	105000	55.0618	10.6853	SVENDBORG	DK031	0.00040341	6.027e-05
ESTIMADO	ES1410910002011	0	105000	37.385	-5.97734	SEVILLA I (TABLADA)	ES618	0.00040341	6.027e-05
C	UKENNE_Agg000186		104948	53.547	-1.0931	Doncaster ( Sandall)	UKE31	0.00040321	6.02402e-05
stima riferita ai dati ISTAT ATU del 2009 (Abitanti totali Urbani)	IT090000000161		104811	43.8896	10.687	PESCIA	ITI13	0.000402684	6.01615e-05
C	UKENAN_Agg000293		104677	52.7055	0.157541	Wisbech	UKH16	0.000402169	6.00846e-05
C	UKENSO_Agg000013		104496	50.9589	-1.33446	Eastleigh	UKJ35	0.000401474	5.99807e-05
Estimated	DEAG_RP101000012		104316	50.5537	7.25547	Untere Ahr Sinzig	DEB12	0.000400782	5.98774e-05
Metodologia di calcolo: Popolazione residente, presente, pendolare e in strutture alberghiere, abitanti in seconde abitazioni, servizi ristorazione, attività manifatturiere micro, attività manifatturiere medio grandi. Gli agglomerati sono stati individuat	IT160000000046		104227	41.6871	15.3602	SAN_SEVERO	ITF46	0.00040044	5.98263e-05
Somma della popolazione residente, della popolazione fluttuante (alberghi e seconde case) e degli a.e. industriali stimati in base al numero di addetti ripartiti per tipologia di attività produttiva, secondo il metodo IRSA CNR.	IT20000000000116		104198	40.9255	9.49372	OLBIA	ITG29	0.000400329	5.98097e-05
Somma degli abitanti equivalenti serviti dall'impianto/i di depurazione e dalla/e imhoff presente/i nel agglomerato. Per quanto attiene i depuratori biologici sono ripresi dal "Piano provinciale di risanamento delle acque" approvato con deliberazione dell	IT220000000053	0	104004	46.0129	11.1017	TRENTO_TRE	ITH20	0.000399583	5.96983e-05
C	UKENNW_Agg000038		103938	53.1101	-2.49982	Crewe	UKD62	0.00039933	5.96604e-05
applied weighing factor: combined treated load from connected UWTTP's x 1.013	NLA17078	0	103918	51.8131	4.5805	ZWIJNDRECHT	NL33A	0.000399253	5.96489e-05
Ausbaugröße mal durchschnittlicher Auslastungsgrad im Berichtsjahr	DEAG_BYLA-K0001		103733	48.5855	12.2376	Klärwerk Landshut	DE221	0.000398542	5.95427e-05
Estimated	DEAG_NW1539		103536	51.6716	6.94247	Dorsten	DEA36	0.000397785	5.94297e-05
Charge moyenne maximale hebdomadaire qui pénètre dans la station d'épuration au cours de l'année, à l'exclusion des situations inhabituelles comme celles qui sont dues à de fortes précipitations + rejets directs sans traitement par déversoirs d'orage	FR100000197414	0	103484	-21.2816	55.3822	SAINT-LOUIS-RÉUNION	FRY40	0.000397586	5.93998e-05
E	CZAG569810		103310	50.2093	15.8327	Hradec Kralove	CZ052	0.000396917	5.92999e-05
resident population + non resident population + seasonal changes + industrial waste waterresident population	PLSL003		103021	50.0924	18.2235	Racibórz	PL227	0.000395807	5.91341e-05
Estimated	DEAG_NW621		103019	51.1058	6.90348	Monheim	DEA1C	0.000395799	5.91329e-05
Charge moyenne maximale hebdomadaire qui pénètre dans la station d'épuration au cours de l'année, à l'exclusion des situations inhabituelles comme celles qui sont dues à de fortes précipitations + rejets directs sans traitement par déversoirs d'orage	FR060000101053	0	102936	46.2064	5.24197	BOURG-EN-BRESSE-VIRIAT	FRK21	0.00039548	5.90853e-05
C	UKENMI_Agg000212		102880	52.6583	-1.72706	Tamworth	UKG24	0.000395265	5.90531e-05
Total agglomeration load=number of inhabitants (national census 2011)+ industry load + turism load (loads from maximum average week)	HRAG_0001171		102785	44.1185	15.2449	Zadar	HR033	0.0003949	5.89986e-05
Charge moyenne maximale hebdomadaire qui pénètre dans la station d'épuration au cours de l'année, à l'exclusion des situations inhabituelles comme celles qui sont dues à de fortes précipitations + rejets directs sans traitement par déversoirs d'orage	FR040000103185	0	102583	46.3314	2.60855	MONTLUCON	FRK11	0.000394124	5.88826e-05
Calculated the sum of the data of the total wastewater load of the settlements constituting the agglomeration	HU-AGGL-AHX890		102553	47.9218	20.3799	Eger - Szennyvizelvezetesi Agglomeracio	HU312	0.000394009	5.88654e-05
General calculation scheme	PTAGL085		102500	38.5219	-8.88992	Setubal	PT170	0.000393805	5.8835e-05
resident population + non resident population + seasonal changes + industrial waste waterresident population	PLOP002		102441	50.4768	17.3363	Nysa	PL523	0.000393578	5.88011e-05
Charge moyenne maximale hebdomadaire qui pénètre dans la station d'épuration au cours de l'année, à l'exclusion des situations inhabituelles comme celles qui sont dues à de fortes précipitations + rejets directs sans traitement par déversoirs d'orage	FR010000159009	0	102334	50.6406	3.15224	VILLENEUVE-D'ASCQ	FRE11	0.000393167	5.87397e-05
Estimado	ES6390850005010	0	102228	43.3547	-4.04709	VUELTA OSTRERA	ES130	0.00039276	5.86789e-05
Calculated the sum of the data of the total wastewater load of the settlements constituting the agglomeration	HU-AGGL-AHY638		102221	47.6864	16.6017	Sopron - (Balf nelkul) - Szennyvizelvezetesi Agglomeracio	HU221	0.000392733	5.86749e-05
DS	DK348	0	101900	55.8019	12.5392	LUNDTOFTE	DK012	0.0003915	5.84906e-05
applied weighing factor: combined treated load from connected UWTTP's x 1.013	NLA10028	0	101792	52.0039	5.07053	IJSSELSTEIN	NL310	0.000391085	5.84286e-05
Charge moyenne maximale hebdomadaire qui pénètre dans la station d'épuration au cours de l'année, à l'exclusion des situations inhabituelles comme celles qui sont dues à de fortes précipitations + rejets directs sans traitement par déversoirs d'orage	FR030000160057	0	101658	49.428	2.08997	BEAUVAIS	FRE22	0.00039057	5.83517e-05
popolazione stanziale + popolazione fluttuante + popolazione industriale	IT03Q13000000006	1	101310	45.6218	9.60729	AG01612901_LURANO	ITC46	0.000389233	5.81519e-05
Residenti + Turisti di punta + AE produttivi in fognatura	IT08000000000104	1	101233	44.4011	11.8831	LUGO	ITH57	0.000388937	5.81077e-05
Estimated	DEAG_NW108		101157	50.6893	6.80152	Kessenich	DEA28	0.000388645	5.80641e-05
calculated	BGAG83510_00		101045	43.2746	26.9349	Shumen	BG333	0.000388215	5.79998e-05
General calculation scheme	PTAGL096		101000	41.533	-8.62118	Barcelos	PT112	0.000388042	5.7974e-05
stimato	IT12000000000011	1	101000	41.4455	12.6275	ANZIO	ITI44	0.000388042	5.7974e-05
Charge moyenne maximale hebdomadaire qui pénètre dans la station d'épuration au cours de l'année, à l'exclusion des situations inhabituelles comme celles qui sont dues à de fortes précipitations + rejets directs sans traitement par déversoirs d'orage	FR060000174281	0	100972	46.3719	6.49252	THONON-LES-BAINS	FRK28	0.000387934	5.79579e-05
Residenti+fluttuanti+reflui industriali in fognatura	IT1983005_02		100796	38.1519	15.2088	BARCELLONA POZZO DI GOTTO -TERME	ITG13	0.000387258	5.78569e-05
Estimated	DEAG_NW12		100772	50.8322	6.33528	Eschweiler-Weisweiler-ZKA	DEA26	0.000387166	5.78431e-05
Residenti + Turisti di punta + AE produttivi in fognatura	IT08000000000058	1	100746	44.1459	12.2431	CESENA	ITH58	0.000387066	5.78282e-05
resident population + non resident population + seasonal changes + industrial waste waterresident population	PLSL012		100674	50.1994	19.2752	Jaworzno	PL22B	0.00038679	5.77869e-05
C	UKSC_Agg00157		100353	56.3832	-3.385	Bridge of Earn	UKM77	0.000385556	5.76026e-05
(PROMEDIO ANUAL CAUDAL TRATADO(M3/D)* PROMEDIO ANUAL DE CONCENTRACIÃ“N DBO5 (MG/L) DEL INFLUENTE) / 60	ES9082810001020	0	100277	41.5048	2.31807	TEIA-MARESME SUD	ES511	0.000385264	5.7559e-05
Calculation - Includes resident population, economic activities, tourism, seasonal changes (connected or not), industries discharging into networks/WWTP (max average weekly loads)	ROAG_159623	0	100000	45.171	28.802	Tulcea	RO225	0.0003842	5.74e-05
DS	DK359	0	100000	55.2416	9.50593	HADERSLEV	DK032	0.0003842	5.74e-05
ESTIMADO	ES8130710004011	0	100000	38.6918	-4.10783	PUERTOLLANO GUADALQUIVIR	ES422	0.0003842	5.74e-05
DS	DK793	0	100000	56.1265	10.1428	VIBY	DK042	0.0003842	5.74e-05
Residenti+fluttuanti+reflui industriali in fognatura	IT1983097_01		100000	37.844	15.2768	TAORMINA_CONSORTILE	ITG13	0.0003842	5.74e-05
The calculation of the generated load includes resident population, seasonal population, tourism and industrial waste water.	CY61-Agglo		100000	34.7762	32.4205	Paphos	CY000	0.0003842	5.74e-05
Il carico generato è stato ottenuto sommando gli abitanti equivalenti residenti (fonte ISTAT anno 2008); gli abitanti equivalenti fluttuanti (fonte ISTAT anno 2008); gli abitanti equivalenti industriali allacciati alla rete fognaria (fonte ISTAT 2008), tarati in funzione del carico in ingresso fornito dal Gestore	IT1300000030		100000	42.0589	14.7446	San Salvo - Vasto marina	ITF14	0.0003842	5.74e-05
treatment capacity of plant as indication for generated load	ATAG_4-40703001		100000	47.7249	13.6484	Bad Ischl (Wolfgangsee-Ischl)	AT315	0.0003842	5.74e-05
treatment capacity of plant as indication for generated load	ATAG_7-7511102		100000	47.5349	12.1086	Kirchbichl (Wörgl-Kirchbichl und Umgebung)	AT335	0.0003842	5.74e-05
DS	DK286	0	100000	55.4899	12.1923	KØGE	DK022	0.0003842	5.74e-05
General calculation scheme	PTAGL094		100000	32.6493	-16.9083	Funchal	PT300	0.0003842	5.74e-05
ESTIMADO	ES18520010000000	0	100000	35.3	-2.93963	MELILLA	ES640	0.0003842	5.74e-05
	ES10031280000001	0	469	38.7035	0.127912	TEULADA(TROS DE BENAVENT)	ES521	1.8019	0.269206
Charge moyenne maximale hebdomadaire qui pénètre dans la station d'épuration au cours de l'année, à l'exclusion des situations inhabituelles comme celles qui sont dues à de fortes précipitations + rejets directs sans traitement par déversoirs d'orage	FR060000188351	0	465	47.97	6.42825	PLOMBIERES-LES-BAINS	FRF34	1.78653	0.26691
Estimation	ROAG_52124_01	0	464	45.0417	22.329	Crusovat	RO422	1.78269	0.266336
Charge moyenne maximale hebdomadaire qui pénètre dans la station d'épuration au cours de l'année, à l'exclusion des situations inhabituelles comme celles qui sont dues à de fortes précipitations + rejets directs sans traitement par déversoirs d'orage	FR060000104094	0	464	43.7684	5.86148	GREOUX-LES-BAINS	FRL01	1.78269	0.266336
Estimation which includes resident population	ROAG_81754	0	460	45.0972	23.544	Sacelu	RO412	1.76732	0.26404
Calculated the sum of the data of the total wastewater load of the settlements constituting the agglomeration	HU-AGGL-AHX279		460	46.5992	17.2706	Savoly - Szennyvizelvezetesi Agglomeracio	HU232	1.76732	0.26404
Carga anual media	ES10120430000000	0	460	39.9461	-0.561259	CAUDIEL	ES522	1.76732	0.26404
Estimation which includes resident population	ROAG_113233		454	44.6082	22.9158	Prunisor	RO413	1.74427	0.260596
Charge moyenne maximale hebdomadaire qui pénètre dans la station d'épuration au cours de l'année, à l'exclusion des situations inhabituelles comme celles qui sont dues à de fortes précipitations + rejets directs sans traitement par déversoirs d'orage	FR060000283069	0	453	43.1273	6.1412	HYERES-2 (PORQUEROLLES)	FRL05	1.74043	0.260022
Estimation	ROAG_159133	0	452	45.7993	22.0687	Traian Vuia	RO424	1.73658	0.259448
Estimation	ROAG_53522_04	0	450	44.7774	21.5846	Susca	RO422	1.7289	0.2583
Calculation which includes resident population, economic activities, tourism, seasonal changes (connected or not), industries discharging into networks/WWTP (max average weekly loads	ROAG_166057		450	46.7242	27.6254	Stefan cel Mare	RO216	1.7289	0.2583
Estimation which includes resident population	ROAG_74750_01	0	450	44.2499	23.6303	Criva	RO411	1.7289	0.2583
Charge moyenne maximale hebdomadaire qui pénètre dans la station d'épuration au cours de l'année, à l'exclusion des situations inhabituelles comme celles qui sont dues à de fortes précipitations + rejets directs sans traitement par déversoirs d'orage	FR060000111115	0	450	43.3763	2.28202	CUXAC-CABARDES	FRJ11	1.7289	0.2583
Carga anual media	ES10120440000000	0	446	40.4567	0.283466	CERVERA DEL MAESTRE	ES522	1.71353	0.256004
Estimation which includes resident population	ROAG_33024		445	46.9816	24.1782	Chiochis	RO112	1.70969	0.25543
Estimation which includes resident population	ROAG_177012		444	45.8275	26.74	Nistoresti	RO226	1.70585	0.254856
Calculation which includes resident population, economic activities, tourism, seasonal changes (connected or not), industries discharging into networks/WWTP (max average weekly loads), IAS	ROAG_30416	0	442	46.6948	22.2979	Pocola	RO111	1.69816	0.253708
Calculation which includes resident population, economic activities, tourism, seasonal changes (connected or not), industries discharging into networks/WWTP (max average weekly loads), IAS	ROAG_176560	0	441	45.5868	26.7447	Jitia	RO226	1.69432	0.253134
Carga anual media	ES10469020000000	0	441	39.7656	-0.519548	GATOVA	ES523	1.69432	0.253134
Estimation which includes resident population	ROAG_150711		440	47.8898	25.2912	Ulma	RO215	1.69048	0.25256
Estimation which includes resident population	ROAG_1103296_07		440	44.8768	22.8007	Rudina	RO413	1.69048	0.25256
Calculation which includes resident population, economic activities, tourism, seasonal changes (connected or not), industries discharging into networks/WWTP (max average weekly loads), IAS	ROAG_26699_01	0	438	47.163	22.4185	Padurea Neagra	RO111	1.6828	0.251412
Estimation which includes resident population	ROAG_33774		438	47.0134	24.5089	Mariselu	RO112	1.6828	0.251412
Estimation which includes resident population	ROAG_80123_01	0	435	45.0009	23.3159	Bucureasa	RO412	1.67127	0.24969
Calculation which includes resident population, economic activities, tourism, seasonal changes (connected or not), industries discharging into networks/WWTP (max average weekly loads), IAS	ROAG_9743_02	0	434	46.2703	22.2507	Radesti - UAT Almas	RO421	1.66743	0.249116
Estimation	ROAG_53176_03	0	434	45.2774	21.807	Vodinic	RO422	1.66743	0.249116
Estimation	ROAG_159268	0	434	45.6416	21.8967	Victor Vlad Delamarina	RO424	1.66743	0.249116
Charge moyenne maximale hebdomadaire qui pénètre dans la station d'épuration au cours de l'année, à l'exclusion des situations inhabituelles comme celles qui sont dues à de fortes précipitations + rejets directs sans traitement par déversoirs d'orage	FR060000111172	0	434	43.2694	2.72092	HOMPS	FRJ11	1.66743	0.249116
Calculated the sum of the data of the total wastewater load of the settlements constituting the agglomeration	HU-AGGL-AIP557		433	46.3922	18.4239	Kisvejke - Szennyvizelvezetesi Agglomeracio	HU233	1.66359	0.248542
Carga anual media	ES10121320000000	0	433	40.2268	0.06968	VILANOVA D'ALCOLEA	ES522	1.66359	0.248542
Calculation which includes resident population, economic activities, tourism, seasonal changes (connected or not), industries discharging into networks/WWTP (max average weekly loads	ROAG_165069		431	46.5832	27.9024	Oltenesti	RO216	1.6559	0.247394
Estimation which includes resident population	ROAG_102703_01		430	44.713	26.4543	Dridu-Snagov	RO315	1.65206	0.24682
Carga anual media	ES10462490000000	0	428	39.6161	-1.27491	UTIEL (LAS CUEVAS)	ES523	1.64438	0.245672
Calculation which includes resident population, economic activities, tourism, seasonal changes (connected or not), industries discharging into networks/WWTP (max average weekly loads)	ROAG_120085	0	427	46.5749	24.8016	Vargata	RO125	1.64053	0.245098
DATO ANUAL DE EXPLOTACIÓN DE LA ESTACIÓN DEPURADORA DE AGUAS RESIDUALES	ES17261570001010	0	427	42.4014	-2.71863	TRICIO ARENZANAS	ES230	1.64053	0.245098
Estimation which includes resident population	ROAG_81987	0	425	45.1753	23.2934	Schela	RO412	1.63285	0.24395
Calculation which includes resident population, economic activities, tourism, seasonal changes (connected or not), industries discharging into networks/WWTP (max average weekly loads), IAS	ROAG_141946_02	0	425	47.2566	22.5747	Lesmir	RO116	1.63285	0.24395
Charge moyenne maximale hebdomadaire qui pénètre dans la station d'épuration au cours de l'année, à l'exclusion des situations inhabituelles comme celles qui sont dues à de fortes précipitations + rejets directs sans traitement par déversoirs d'orage	FR060000111233	0	425	43.2864	2.89282	MIREPEISSET	FRJ11	1.63285	0.24395
Calculation which includes resident population, economic activities, tourism, seasonal changes (connected or not), industries discharging into networks/WWTP (max average weekly loads	ROAG_166869		422	46.5624	27.425	Voinesti	RO216	1.62132	0.242228
Estimation which includes resident population	ROAG_113974		422	44.6246	23.0953	Voloiac	RO413	1.62132	0.242228
Estimation which includes resident population	ROAG_91241_04	0	420	45.5616	22.9758	Ciopeia	RO423	1.61364	0.24108
Estimation which includes resident population	ROAG_134648_07		419	45.2934	26.1815	Valea Screzii	RO316	1.6098	0.240506
SEGUN ESQUEMA GENERAL DE CALCULO	ES13280640002010	0	418	41.0028	-3.6363	GASCONES (CONJUNTA DE GASCONES)	ES300	1.60596	0.239932
Carga anual media	ES10460530000000	0	416	39.0678	-0.546874	BENEIXIDA	ES523	1.59827	0.238784
Estimation which includes resident population	ROAG_61684		414	44.0907	28.0098	Deleni	RO223	1.59059	0.237636
Estimation	ROAG_54314_02	0	413	45.1453	21.6383	Secaseni	RO422	1.58675	0.237062
Carga anual media	ES10030990022010	0	411	38.1314	-0.981125	ORIHUELA (LA MATANZA)	ES521	1.57906	0.235914
Estimation	ROAG_53684_01	0	410	44.9975	21.6253	Vraniut	RO422	1.57522	0.23534
Estimation which includes resident population	ROAG_102838		409	44.3199	26.811	Frasinet	RO312	1.57138	0.234766
(PROMEDIO ANUAL CAUDAL TRATADO(M3/D)* PROMEDIO ANUAL DE CONCENTRACIÃ“N DBO5 (MG/L) DEL INFLUENTE) / 60	ES9179020202010	0	409	41.9777	3.08994	PERATALLADA	ES512	1.57138	0.234766
(PROMEDIO ANUAL CAUDAL TRATADO(M3/D)* PROMEDIO ANUAL DE CONCENTRACIÃ“N DBO5 (MG/L) DEL INFLUENTE) / 60	ES9439030001010	0	406	40.7738	0.67247	CAMARLES	ES514	1.55985	0.233044
Calculated the sum of the data of the total wastewater load of the settlements constituting the agglomeration	HU-AGGL-ANC237		401	46.7039	17.1178	Esztergalyhorvati - Szennyvizelvezetesi Agglomeracio	HU223	1.54064	0.230174
Calculation which Includes resident population, economic activities, tourism, seasonal changes (connected or not), industries discharging into networks/WWTP (max average weekly loads)	ROAG_32651	0	401	47.2224	24.6976	Colibita	RO113	1.54064	0.230174
Estimation which includes resident population	ROAG_110571		400	44.484	23.1209	Bacles	RO413	1.5368	0.2296
Charge moyenne maximale hebdomadaire qui pénètre dans la station d'épuration au cours de l'année, à l'exclusion des situations inhabituelles comme celles qui sont dues à de fortes précipitations + rejets directs sans traitement par déversoirs d'orage	FR040000129238	0	400	48.3191	-4.56159	ROSCANVEL	FRH02	1.5368	0.2296
Calculated the sum of the data of the total wastewater load of the settlements constituting the agglomeration	HU-AGGL-AHX470		400	47.2719	17.1008	Tokorcs - Szennyvizelvezetesi Agglomeracio	HU222	1.5368	0.2296
Estimation which includes resident population and economic activities	ROAG_54065_03	0	398	45.248	22.3004	Sadova Veche	RO422	1.52912	0.228452
Estimation	ROAG_51216_01	0	398	45.5159	22.3562	Mal	RO422	1.52912	0.228452
Estimation	ROAG_51706	0	396	45.3623	22.2425	Buchin	RO422	1.52143	0.227304
Calculated the sum of the data of the total wastewater load of the settlements constituting the agglomeration	HU-AGGL-AIJ393		394	47.4875	16.9067	Pusztacsalad - Szennyvizelvezetesi Agglomeracio	HU221	1.51375	0.226156
Estimation which includes resident population	ROAG_91241_05	0	394	45.571	22.9438	Barastii Hategului	RO423	1.51375	0.226156
Estimation which includes resident population	ROAG_111989		393	44.6449	23.3151	Grozesti	RO413	1.50991	0.225582
Calculated the sum of the data of the total wastewater load of the settlements constituting the agglomeration	HU-AGGL-AOT190		393	46.5375	17.0944	Csapi - Szennyvizelvezetesi Agglomeracio	HU223	1.50991	0.225582
SEGUN ESQUEMA GENERAL DE CALCULO	ES13280620003010	0	392	40.9432	-3.70705	GARGANTA DE LOS MONTES (RIOSEQUILLO)	ES300	1.50606	0.225008
Charge moyenne maximale hebdomadaire qui pénètre dans la station d'épuration au cours de l'année, à l'exclusion des situations inhabituelles comme celles qui sont dues à de fortes précipitations + rejets directs sans traitement par déversoirs d'orage	FR050000112167	0	391	44.2136	1.96587	NAJAC	FRJ22	1.50222	0.224434
Estimation which includes resident population	ROAG_73004		391	43.8816	23.6635	Sapata	RO411	1.50222	0.224434
Estimation	ROAG_51877_02	0	390	45.5419	22.1494	Matnicu Mare	RO422	1.49838	0.22386
Estimation which includes resident population	ROAG_79594	0	390	44.8647	22.9059	Catunele	RO412	1.49838	0.22386
Calculated the sum of the data of the total wastewater load of the settlements constituting the agglomeration	HU-AGGL-AIE187		388	48.2853	20.5003	Dubicsany - Szennyvizelvezetesi Agglomeracio	HU311	1.4907	0.222712
Charge moyenne maximale hebdomadaire qui pénètre dans la station d'épuration au cours de l'année, à l'exclusion des situations inhabituelles comme celles qui sont dues à de fortes précipitations + rejets directs sans traitement par déversoirs d'orage	FR010000180062	0	387	49.8452	1.78005	BEAUCAMPS-LE-VIEUX	FRE23	1.48685	0.222138
Calculation which includes resident population, economic activities, tourism, seasonal changes (connected or not), industries discharging into networks/WWTP (max average weekly loads), IAS	ROAG_31057	0	382	46.7953	22.1824	Sambata	RO111	1.46764	0.219268
Calculation which includes resident population, economic activities, tourism, seasonal changes (connected or not), industries discharging into networks/WWTP (max average weekly loads	ROAG_163618		377	46.8032	28.1284	Dranceni	RO216	1.44843	0.216398
Estimation which includes resident population	ROAG_134755_03		376	45.1749	26.1077	Poienile	RO316	1.44459	0.215824
Calculation which includes resident population, economic activities, tourism, seasonal changes (connected or not), industries discharging into networks/WWTP (max average weekly loads	ROAG_164277_04		375	46.5558	28.0758	Plotonesti	RO216	1.44075	0.21525
Carga anual media	ES10461140000000	0	371	39.6583	-0.674199	DOMEÑO	ES523	1.42538	0.212954
Calculation which includes resident population, economic activities, tourism, seasonal changes (connected or not), industries discharging into networks/WWTP (max average weekly loads), IAS	ROAG_28889	0	368	46.4279	22.5272	Cristioru de Jos	RO111	1.41386	0.211232
Estimation which includes resident population	ROAG_111685		368	44.7635	22.9475	Floresti (Floresti, Mosneni)	RO413	1.41386	0.211232
Carga anual media	ES10461030000000	0	367	39.7273	-0.235159	LA FOIA DE QUARTELL	ES523	1.41001	0.210658
Calculated the sum of the data of the total wastewater load of the settlements constituting the agglomeration	HU-AGGL-AIQ384		366	48.3011	20.5419	Sajogalgoc - Szennyvizelvezetesi Agglomeracio	HU311	1.40617	0.210084
Calculation which includes resident population, economic activities, tourism, seasonal changes (connected or not), industries discharging into networks/WWTP (max average weekly loads), IAS	ROAG_29341	0	365	46.9004	22.1362	Dragesti	RO111	1.40233	0.20951
Estimation which includes resident population	ROAG_112806		364	44.4424	23.0129	Padina	RO413	1.39849	0.208936
CALCULADO	ES8191520002010	0	364	40.1835	-2.90599	ILLANA	ES424	1.39849	0.208936
Estimation which includes resident population	ROAG_107877		362	47.3744	23.7628	Coroieni	RO114	1.3908	0.207788
Estimation which includes resident population	ROAG_80560_01	0	362	44.5892	23.4447	Picu	RO412	1.3908	0.207788
Calculation which includes resident population, economic activities, tourism, seasonal changes (connected or not), industries discharging into networks/WWTP (max average weekly loads), IAS	ROAG_30773_02	0	362	46.5925	22.4338	Sudrigiu - UAT Rieni	RO111	1.3908	0.207788
Estimation which includes resident population	ROAG_59951		360	47.2191	23.7438	Vad	RO113	1.38312	0.20664
Estimation which includes resident population	ROAG_74750_04		359	44.2576	23.5685	Gabru	RO411	1.37928	0.206066
Calculation which includes resident population, economic activities, tourism, seasonal changes (connected or not), industries discharging into networks/WWTP (max average weekly loads), IAS	ROAG_142952_04	0	359	47.107	22.7025	Subcetate	RO116	1.37928	0.206066
Calculated the sum of the data of the total wastewater load of the settlements constituting the agglomeration	HU-AGGL-AHY209		359	46.7678	16.5572	Kozmadombja - Szennyvizelvezetesi Agglomeracio	HU223	1.37928	0.206066
Estimation which includes resident population	ROAG_1103296_03		358	44.9242	22.849	Brativoesti (Brativoesti,Comanesti, Molani)	RO413	1.37544	0.205492
Carga anual media	ES10462630000000	0	357	39.0961	-1.07348	ZARRA	ES523	1.37159	0.204918
Calculated the sum of the data of the total wastewater load of the settlements constituting the agglomeration	HU-AGGL-AHY265		357	48.0525	22.8717	Magosliget - Szennyvizelvezetesi Agglomeracio	HU323	1.37159	0.204918
Carga anual media	ES10461150000000	0	355	39.2862	-0.799089	DOS AGUAS	ES523	1.36391	0.20377
Estimation	ROAG_51127_05	0	353	45.0596	21.6805	Rachitova	RO422	1.35623	0.202622
Calculation which includes resident population, economic activities, tourism, seasonal changes (connected or not), industries discharging into networks/WWTP (max average weekly loads	ROAG_75356_02		352	46.133	27.9161	Aldesti	RO224	1.35238	0.202048
Estimation	ROAG_54626_04	0	349	45.525	22.4084	Valea Bistrei	RO422	1.34086	0.200326
Estimation	ROAG_53381_01	0	348	45.4807	22.2264	Ciuta	RO422	1.33702	0.199752
Calculated the sum of the data of the total wastewater load of the settlements constituting the agglomeration	HU-AGGL-AOS920		345	47.1356	17.4086	Borszorcsok - Szennyvizelvezetesi Agglomeracio	HU213	1.32549	0.19803
Carga anual media	ES10462420000000	0	345	40.0941	-1.25207	TORREBAJA	ES523	1.32549	0.19803
Calculation which includes resident population, economic activities, tourism, seasonal changes (connected or not), industries discharging into networks/WWTP (max average weekly loads), IAS	ROAG_141312_03	0	344	47.147	22.631	Aleus_Halmasd	RO116	1.32165	0.197456
Estimation which includes resident population	ROAG_73665		344	43.8994	23.1636	Piscu-Vechi	RO411	1.32165	0.197456
Estimation	ROAG_54314_01	0	342	45.139	21.6377	Carnecea	RO422	1.31396	0.196308
Estimation	ROAG_54314_03	0	339	45.1159	21.651	Ticvaniu Mic	RO422	1.30244	0.194586
Calculation which includes resident population, economic activities, tourism, seasonal changes (connected or not), industries discharging into networks/WWTP (max average weekly loads	ROAG_177879		338	46.1041	27.3908	Tanasoaia	RO226	1.2986	0.194012
Carga anual media	ES10031130001010	0	334	38.0722	-0.723583	ROJALES (CIUDAD QUESADA 1)	ES521	1.28323	0.191716
Estimation which includes resident population	ROAG_106372_01		333	47.6028	23.576	Ocolis	RO114	1.27939	0.191142
Estimation which includes resident population	ROAG_72846_01		331	44.4466	23.2806	Grecesti	RO411	1.2717	0.189994
Estimation which includes resident population	ROAG_72819		331	44.446	23.2791	Grecesti	RO411	1.2717	0.189994
Calculation which includes resident population, economic activities, tourism, seasonal changes (connected or not), industries discharging into networks/WWTP (max average weekly loads), IAS	ROAG_29760	0	331	46.5923	22.4045	Lazuri de Beius	RO111	1.2717	0.189994
Estimation	ROAG_53737_01	0	328	45.6338	22.4115	Ruschita	RO422	1.26018	0.188272
Estimation which includes resident population	ROAG_33854_01		326	46.8606	24.3103	Micestii de Campie	RO112	1.25249	0.187124
Calculated the sum of the data of the total wastewater load of the settlements constituting the agglomeration	HU-AGGL-AHX186		325	46.4431	16.8481	Petrivente - Szennyvizelvezetesi Agglomeracio	HU223	1.24865	0.18655
Estimation	ROAG_54421_04	0	325	45.3781	22.296	Zlagna	RO422	1.24865	0.18655
Estimation which includes resident population	ROAG_91241_08	0	324	45.5845	23.0005	Balomir	RO423	1.24481	0.185976
Estimation which includes resident population	ROAG_112995		323	44.9776	22.7647	Ponoarele	RO413	1.24097	0.185402
Estimation	ROAG_52794_04	0	323	45.4867	21.8548	Scaius	RO422	1.24097	0.185402
Calculation which includes resident population, economic activities, tourism, seasonal changes (connected or not), industries discharging into networks/WWTP (max average weekly loads), IAS	ROAG_141722_04	0	322	47.194	22.5882	Cosniciu de Sus	RO116	1.23712	0.184828
Estimation	ROAG_158902	0	322	45.7834	22.3094	Tomesti	RO424	1.23712	0.184828
Estimation	ROAG_50807_03	0	319	45.3522	21.8293	Moniom	RO422	1.2256	0.183106
Carga anual media	ES10460410000000	0	318	39.9215	-1.13061	ARAS DE LOS OLMOS	ES523	1.22176	0.182532
Estimation which includes resident population	ROAG_111685_01		318	44.7798	22.8977	Copacioasa	RO413	1.22176	0.182532
Calculation which includes resident population, economic activities, tourism, seasonal changes (connected or not), industries discharging into networks/WWTP (max average weekly loads	ROAG_36532_01		317	48.1322	26.5993	Movileni	RO212	1.21791	0.181958
(PROMEDIO ANUAL CAUDAL TRATADO(M3/D)* PROMEDIO ANUAL DE CONCENTRACIÃ“N DBO5 (MG/L) DEL INFLUENTE) / 60	ES9080480001010	0	315	41.5333	1.62285	CARME	ES511	1.21023	0.18081
Estimation which includes resident population	ROAG_177478		314	45.7939	26.8369	Reghiu	RO226	1.20639	0.180236
Estimation which includes resident population	ROAG_1103296_05		313	44.9042	22.8732	Crainici	RO413	1.20255	0.179662
Estimation which includes resident population	ROAG_149628		313	47.9598	25.9872	Musenita	RO215	1.20255	0.179662
Estimation which includes resident population	ROAG_113732		310	44.5695	23.0243	Tamna	RO413	1.19102	0.17794
Estimation which includes resident population	ROAG_133615_01		310	45.1001	26.2801	Dobrota	RO316	1.19102	0.17794
Calculated the sum of the data of the total wastewater load of the settlements constituting the agglomeration	HU-AGGL-AHY453		310	48.0928	22.3522	Olcsvaapati - Szennyvizelvezetesi Agglomeracio	HU323	1.19102	0.17794
Calculated the sum of the data of the total wastewater load of the settlements constituting the agglomeration	HU-AGGL-AIQ382		306	48.3514	20.7914	Ladbesenyo - Szennyvizelvezetesi Agglomeracio	HU311	1.17565	0.175644
Calculated the sum of the data of the total wastewater load of the settlements constituting the agglomeration	HU-AGGL-AIQ387		302	48.5275	20.8742	Tornaszentjakab - Szennyvizelvezetesi Agglomeracio	HU311	1.16028	0.173348
ESTIMADO	ES8161810001010	0	300	39.9933	-2.80835	ROZALÉN DEL MONTE	ES423	1.1526	0.1722
General calculation scheme	PTAGL258		300	40.9779	-7.71587	Alvite	PT11D	1.1526	0.1722
Estimation	ROAG_52179	0	299	45.0631	22.4183	Cornereva	RO422	1.14876	0.171626
Calculated the sum of the data of the total wastewater load of the settlements constituting the agglomeration	HU-AGGL-AIQ772		298	46.3233	18.25	Alsomocsolad - Szennyvizelvezetesi Agglomeracio	HU231	1.14492	0.171052
Estimation which includes resident population	ROAG_132896_04		296	45.2497	26.0668	Făget	RO316	1.13723	0.169904
Estimation which includes resident population	ROAG_78604_01	0	292	44.7536	23.5183	Bobaia	RO412	1.12186	0.167608
Calculated the sum of the data of the total wastewater load of the settlements constituting the agglomeration	HU-AGGL-AIQ372		292	48.5331	21.3275	Abaujvar - Szennyvizelvezetesi Agglomeracio	HU311	1.12186	0.167608
Calculation which includes resident population, economic activities, tourism, seasonal changes (connected or not), industries discharging into networks/WWTP (max average weekly loads	ROAG_164277_05		290	46.5674	28.0541	Urlati	RO216	1.11418	0.16646
Calculation which includes resident population, economic activities, tourism, seasonal changes (connected or not), industries discharging into networks/WWTP (max average weekly loads	ROAG_162924_04		290	46.7708	27.9925	Plopi	RO216	1.11418	0.16646
Estimation which includes resident population	ROAG_82136_06	0	288	45.097	23.2634	Calesti (Calesti, Mazaroi)	RO412	1.1065	0.165312
Calculated the sum of the data of the total wastewater load of the settlements constituting the agglomeration	HU-AGGL-ANR755		286	46.5278	18.5261	Varsad - Szennyvizelvezetesi Agglomeracio	HU233	1.09881	0.164164
SEGUN ESQUEMA GENERAL DE CALCULO	ES13281350010010	0	285	40.5949	-4.25285	SANTA Mª DE LA ALAMEDA	ES300	1.09497	0.16359
Calculated the sum of the data of the total wastewater load of the settlements constituting the agglomeration	HU-AGGL-AHW682		283	46.8678	16.5589	Hegyhatszentjakab - Szennyvizelvezetesi Agglomeracio	HU222	1.08729	0.162442
Estimation which includes resident population	ROAG_80560_02	0	282	44.6049	23.4299	Gura Susitei	RO412	1.08344	0.161868
Estimation	ROAG_53522_02	0	281	44.7728	21.5673	Divici	RO422	1.0796	0.161294
Estimation which includes resident population	ROAG_80043	0	280	44.7382	23.7601	Danciulesti	RO412	1.07576	0.16072
Estimation which includes resident population	ROAG_74750	0	278	44.2451	23.6085	Varvoru de Jos	RO411	1.06808	0.159572
Calculation which includes resident population, economic activities, tourism, seasonal changes (connected or not), industries discharging into networks/WWTP (max average weekly loads	ROAG_162924_02		277	46.7853	27.9878	Averesti-din Bunesti-Averesti	RO216	1.06423	0.158998
Estimation which includes resident population	ROAG_108160		275	47.8192	23.9257	Giulesti	RO114	1.05655	0.15785
Calculated the sum of the data of the total wastewater load of the settlements constituting the agglomeration	HU-AGGL-AHY284		274	48.0014	22.6061	Mand - Szennyvizelvezetesi Agglomeracio	HU323	1.05271	0.157276
Estimation which includes resident population	ROAG_80123_02	0	273	44.9883	23.2881	Botorogi	RO412	1.04887	0.156702
Calculation which includes resident population, economic activities, tourism, seasonal changes (connected or not), industries discharging into networks/WWTP (max average weekly loads	ROAG_35759_02		270	47.6892	26.6545	Baiceni	RO212	1.03734	0.15498
Estimation	ROAG_53434_03	0	270	45.3855	22.133	Rugi	RO422	1.03734	0.15498
Residenti+fluttuanti+reflui industriali in fognatura	IT1985020_01		268	37.5249	13.7327	SUTERA	ITG15	1.02966	0.153832
Calculated the sum of the data of the total wastewater load of the settlements constituting the agglomeration	HU-AGGL-ANQ529		267	46.0447	17.9581	Kacsota - Szennyvizelvezetesi Agglomeracio	HU231	1.02581	0.153258
Calculation which includes resident population, economic activities, tourism, seasonal changes (connected or not), industries discharging into networks/WWTP (max average weekly loads	ROAG_162924_05		266	46.8304	27.949	Podu Oprii	RO216	1.02197	0.152684
Calculated the sum of the data of the total wastewater load of the settlements constituting the agglomeration	HU-AGGL-AOJ259		266	48.3119	20.9411	Monaj - Szennyvizelvezetesi Agglomeracio	HU311	1.02197	0.152684
Estimation which includes resident population	ROAG_46554		266	45.3298	26.4892	Cozieni	RO222	1.02197	0.152684
Calculated the sum of the data of the total wastewater load of the settlements constituting the agglomeration	HU-AGGL-AIE193		264	46.6417	18.4908	Miszla - Szennyvizelvezetesi agglomeracio	HU233	1.01429	0.151536
Calculated the sum of the data of the total wastewater load of the settlements constituting the agglomeration	HU-AGGL-AHW628		264	46.5683	16.9922	Gelsesziget - Szennyvizelvezetesi Agglomeracio	HU223	1.01429	0.151536
Estimation	ROAG_156507	0	262	45.7758	21.8441	Paru	RO424	1.0066	0.150388
Estimation	ROAG_54065_02	0	259	45.2551	22.2836	Sadova Noua	RO422	0.995078	0.148666
Estimation which includes resident population	ROAG_45245		257	45.5421	26.7028	Bisoca	RO222	0.987394	0.147518
Charge moyenne maximale hebdomadaire qui pénètre dans la station d'épuration au cours de l'année, à l'exclusion des situations inhabituelles comme celles qui sont dues à de fortes précipitations + rejets directs sans traitement par déversoirs d'orage	FR040000141164	0	255	47.2864	1.40518	NOYERS-SUR-CHER-LES ROCHES	FRB05	0.97971	0.14637
Estimation which includes resident population	ROAG_91241_02	0	255	45.5592	22.9225	Sacel	RO423	0.97971	0.14637
Estimation which includes resident population	ROAG_78926	0	254	44.9119	23.6647	Berlesti	RO412	0.975868	0.145796
Estimation which includes resident population	ROAG_91241_01	0	254	45.5519	22.9147	Sanpetru	RO423	0.975868	0.145796
Estimation	ROAG_53318_01	0	253	44.945	22.3884	Globurau	RO422	0.972026	0.145222
Carga anual media	ES10462520000000	0	252	40.061	-1.33752	VALLANCA	ES523	0.968184	0.144648
Calculated the sum of the data of the total wastewater load of the settlements constituting the agglomeration	HU-AGGL-AIQ724		250	48.0444	19.725	Nagykeresztur - Szennyvizelvezetesi Agglomeracio	HU313	0.9605	0.1435
Calculated the sum of the data of the total wastewater load of the settlements constituting the agglomeration	HU-AGGL-AIQ386		250	48.3339	20.8842	Tomor - Szennyvizelvezetesi Agglomeracio	HU311	0.9605	0.1435
Calculation which includes resident population, economic activities, tourism, seasonal changes (connected or not), industries discharging into networks/WWTP (max average weekly loads	ROAG_35759_01		247	47.7082	26.5992	Agafton	RO212	0.948974	0.141778
Calculated the sum of the data of the total wastewater load of the settlements constituting the agglomeration	HU-AGGL-AIQ732		247	48.025	19.7211	Markhaza - Szennyvizelvezetesi Agglomeracio	HU313	0.948974	0.141778
Estimation which includes resident population	ROAG_175518		247	45.5642	26.8607	Chiojdeni	RO226	0.948974	0.141778
ESQUEMA GENERAL DE CALCULO	ES4070570010010	0	243	39.3226	3.13257	CALA SANTANYI	ES532	0.933606	0.139482
Estimation which includes resident population	ROAG_1103296_06		241	44.9039	22.7464	Dalma	RO413	0.925922	0.138334
DATO ANUAL DE EXPLOTACIÓN DE LA ESTACIÓN DEPURADORA DE AGUAS RESIDUALES	ES17261400000000	0	241	42.39	-2.98031	SANTURDE SANTURDEJO	ES230	0.925922	0.138334
Calculated the sum of the data of the total wastewater load of the settlements constituting the agglomeration	HU-AGGL-AHY139		237	47.3047	17.1714	Kemenesszentmarton - Szennyvizelvezetesi Agglomeracio	HU222	0.910554	0.136038
Calculated the sum of the data of the total wastewater load of the settlements constituting the agglomeration	HU-AGGL-AIE227		236	48.1239	20.9147	Ocsanalos - Szennyvizelvezetesi agglomeracio	HU311	0.906712	0.135464
Estimation	ROAG_51813_01	0	234	45.2	21.8617	Iabalcea	RO422	0.899028	0.134316
Estimation	ROAG_52794_03	0	232	45.4877	21.8497	Remetea Pogonici	RO422	0.891344	0.133168
Calculated the sum of the data of the total wastewater load of the settlements constituting the agglomeration	HU-AGGL-AHX522		232	46.8519	17.305	Vallus - Szennyvizelvezetesi Agglomeracio	HU223	0.891344	0.133168
Calculated the sum of the data of the total wastewater load of the settlements constituting the agglomeration	HU-AGGL-AEC004		228	47.2603	18.9033	Ercsi-Sinatelep - Szennyvizelvezetesi Agglomeracio	HU211	0.875976	0.130872
Estimation which includes resident population	ROAG_134648_04		228	45.2757	26.1401	Posestii Ungureni	RO316	0.875976	0.130872
Calculated the sum of the data of the total wastewater load of the settlements constituting the agglomeration	HU-AGGL-ANR745		225	46.5439	18.4764	Szakadat - Szennyvizelvezetesi Agglomeracio	HU233	0.86445	0.12915
ESTIMADO	ES8160100001010	0	224	40.0645	-2.80952	ALCÁZAR DEL REY	ES423	0.860608	0.128576
Estimation	ROAG_52794_01	0	223	45.4919	21.8554	Dezesti	RO422	0.856766	0.128002
Estimation which includes resident population	ROAG_134648_01		220	45.2686	26.1498	Posestii Pamanteni	RO316	0.84524	0.12628
Estimation	ROAG_52794_02	0	218	45.484	21.8469	Duleu	RO422	0.837556	0.125132
Estimation	ROAG_52179_24	0	217	45.0957	22.4154	Pogara de Sus	RO422	0.833714	0.124558
Estimation	ROAG_51458_01	0	216	44.6645	22.1037	Bigar	RO422	0.829872	0.123984
Carga anual media	ES10120990001020	0	216	40.5453	0.393144	SAN JORGE (URB, GOLF PANORAMICA)	ES522	0.829872	0.123984
Calculated the sum of the data of the total wastewater load of the settlements constituting the agglomeration	HU-AGGL-AIQ389		215	48.5011	21.2889	Zsujta - Szennyvizelvezetesi Agglomeracio	HU311	0.82603	0.12341
Estimation which includes resident population	ROAG_91241_07	0	211	45.6007	23.011	Bucium-Orlea	RO423	0.810662	0.121114
Estimation	ROAG_52179_02	0	208	45.0633	22.4179	Bogaltin	RO422	0.799136	0.119392
Calculated the sum of the data of the total wastewater load of the settlements constituting the agglomeration	HU-AGGL-AOT161		207	46.4417	17.1856	Pat - Szennyvizelvezetesi Agglomeracio	HU223	0.795294	0.118818
Calculated the sum of the data of the total wastewater load of the settlements constituting the agglomeration	HU-AGGL-AHY523		206	47.7008	18.905	Pilisszentkereszt - Dobogoko - Szennyvizelvezetesi Agglomeracio	HU323	0.791452	0.118244
Estimation which includes resident population	ROAG_179640_01		205	45.0156	25.4099	Laculete Gara	RO313	0.78761	0.11767
Estimation	ROAG_51127_02	0	202	45.0295	21.6874	Agadici	RO422	0.776084	0.115948
Estimation which includes resident population	ROAG_134648_08		201	45.2641	26.1365	Valea Stupinii	RO316	0.772242	0.115374
Estimation which includes resident population	ROAG_72846_03		196	44.4508	23.2581	Gradistea	RO411	0.753032	0.112504
Calculated the sum of the data of the total wastewater load of the settlements constituting the agglomeration	HU-AGGL-AIY172		196	47.9253	19.6211	Kozard - Szennyvizelvezetesi Agglomeracio	HU313	0.753032	0.112504
Calculated the sum of the data of the total wastewater load of the settlements constituting the agglomeration	HU-AGGL-AHW762		194	46.5783	16.9597	Kacorlak - Szennyvizelvezetesi Agglomeracio	HU223	0.745348	0.111356
Estimation which includes resident population	ROAG_80677_02	0	192	45.0784	23.1738	Rasovita	RO412	0.737664	0.110208
Calculated the sum of the data of the total wastewater load of the settlements constituting the agglomeration	HU-AGGL-AOT156		192	46.5017	17.0731	Kisrecse - Szennyvizelvezetesi agglomeracio	HU223	0.737664	0.110208
Calculation which includes resident population, economic activities, tourism, seasonal changes (connected or not), industries discharging into networks/WWTP (max average weekly loads	ROAG_162924_07		191	46.7625	27.9791	Tabalaiesti	RO216	0.733822	0.109634
Estimation	ROAG_51065_02	0	191	44.7846	21.7117	Moldovita	RO422	0.733822	0.109634
Charge moyenne maximale hebdomadaire qui pénètre dans la station d'épuration au cours de l'année, à l'exclusion des situations inhabituelles comme celles qui sont dues à de fortes précipitations + rejets directs sans traitement par déversoirs d'orage	FR060000170292	0	191	47.8171	5.89004	JUSSEY	FRC23	0.733822	0.109634
Estimation which includes resident population	ROAG_111587		190	44.5173	23.1355	Dumbrava	RO413	0.72998	0.10906
Estimation which includes resident population	ROAG_132404_01		186	45.2081	25.7496	Podu Cheii	RO316	0.714612	0.106764
Estimation which includes resident population	ROAG_47453_08		185	45.1605	26.6637	Valea Putului Merei	RO222	0.71077	0.10619
Calculation which includes resident population, economic activities, tourism, seasonal changes (connected or not), industries discharging into networks/WWTP (max average weekly loads	ROAG_162924_06		182	46.7971	27.9758	Rosiori	RO216	0.699244	0.104468
Estimation which includes resident population	ROAG_47453_04		182	45.1297	26.6436	Gura Saratii	RO222	0.699244	0.104468
Estimation which includes resident population	ROAG_136241_03		181	44.8403	25.9386	Piatra	RO316	0.695402	0.103894
Estimation which includes resident population	ROAG_133795_01		181	45.2608	26.032	Cernesti	RO316	0.695402	0.103894
Calculation which includes resident population, economic activities, tourism, seasonal changes (connected or not), industries discharging into networks/WWTP (max average weekly loads	ROAG_162924_01		178	46.8066	27.9805	Armaseni-din Bunesti-Averesti	RO216	0.683876	0.102172
Estimation which includes resident population	ROAG_136241_02		178	44.8442	25.8949	Satu de Sus	RO316	0.683876	0.102172
Calculated the sum of the data of the total wastewater load of the settlements constituting the agglomeration	HU-AGGL-AIQ479		176	48.4	20.8014	Abod - Szennyvizelvezetesi Agglomeracio	HU311	0.676192	0.101024
Calculated the sum of the data of the total wastewater load of the settlements constituting the agglomeration	HU-AGGL-AOJ255		174	48.3431	20.9261	Kupa - Szennyvizelvezetesi Agglomeracio	HU311	0.668508	0.099876
Estimation	ROAG_52179_29	0	173	45.0298	22.5469	Scarisoara	RO422	0.664666	0.099302
Estimation which includes resident population	ROAG_134648_02		169	45.2621	26.1638	Bodesti	RO316	0.649298	0.097006
Calculated the sum of the data of the total wastewater load of the settlements constituting the agglomeration	HU-AGGL-AHW375		168	46.5311	16.7414	Bazakerettye - Baza - Szennyvizelvezetesi Agglomeracio	HU223	0.645456	0.096432
Estimation which includes resident population	ROAG_122409		165	47.0294	26.5621	Dragomiresti	RO214	0.63393	0.09471
Estimation which includes resident population	ROAG_111685_04		163	44.8228	22.8813	Pesteana (Pesteana, Pestenuta)	RO413	0.626246	0.093562
Calculated the sum of the data of the total wastewater load of the settlements constituting the agglomeration	HU-AGGL-AIQ385		161	48.4167	20.4539	Szuhafo - Szennyvizelvezetesi Agglomeracio	HU311	0.618562	0.092414
Charge moyenne maximale hebdomadaire qui pénètre dans la station d'épuration au cours de l'année, à l'exclusion des situations inhabituelles comme celles qui sont dues à de fortes précipitations + rejets directs sans traitement par déversoirs d'orage	FR010000159555	0	160	50.1569	4.04916	SARS-POTERIES	FRE11	0.61472	0.09184
Calculated the sum of the data of the total wastewater load of the settlements constituting the agglomeration	HU-AGGL-AHY809		158	48.5247	20.7881	Tornaszentandras - Szennyvizelvezetesi Agglomeracio	HU311	0.607036	0.090692
Estimation which includes resident population	ROAG_81816_01	0	155	44.8458	23.4683	Purcaru	RO412	0.59551	0.08897
Estimation	ROAG_52179_35	0	154	45.0549	22.4598	Topla	RO422	0.591668	0.088396
Estimation which includes resident population	ROAG_134755_05		154	45.1808	26.1033	Saratel	RO316	0.591668	0.088396
Estimation	ROAG_52179_03	0	153	45.0663	22.427	Bojia	RO422	0.587826	0.087822
Estimation which includes resident population	ROAG_134755_09		153	45.198	26.1306	Zambroaia	RO316	0.587826	0.087822
Calculated the sum of the data of the total wastewater load of the settlements constituting the agglomeration	HU-AGGL-ANU118		152	46.9394	16.6631	Hegyhathodasz - Szennyvizelvezetesi Agglomeracio	HU222	0.583984	0.087248
Estimation	ROAG_52179_37	0	150	45.0946	22.3888	Zbegu	RO422	0.5763	0.0861
Calculation which includes resident population, economic activities, tourism, seasonal changes (connected or not), industries discharging into networks/WWTP (max average weekly loads	ROAG_163681_01		147	46.7219	28.0022	Bobesti	RO216	0.564774	0.084378
Estimation which includes resident population	ROAG_111685_05		147	44.8339	22.8929	Stroesti	RO413	0.564774	0.084378
Calculation which includes resident population, economic activities, tourism, seasonal changes (connected or not), industries discharging into networks/WWTP (max average weekly loads	ROAG_35759_03		147	47.7369	26.6288	Hudum	RO212	0.564774	0.084378
Calculation which includes resident population, economic activities, tourism, seasonal changes (connected or not), industries discharging into networks/WWTP (max average weekly loads	ROAG_175787		146	46.1517	27.3055	Corbita	RO226	0.560932	0.083804
Estimation	ROAG_52179_32	0	146	45.1004	22.4685	Sub Crang	RO422	0.560932	0.083804
Calculated the sum of the data of the total wastewater load of the settlements constituting the agglomeration	HU-AGGL-AEC008		145	47.2603	18.9033	Ercsi-Also Sinatelep - Szennyvizelvezetesi Agglomeracio	HU211	0.55709	0.08323
Estimation which includes resident population	ROAG_1103296_10		145	44.8599	22.8264	Vidimiresti	RO413	0.55709	0.08323
Estimation which includes resident population	ROAG_47453_06		144	45.159	26.6952	Ciobanoaia	RO222	0.553248	0.082656
Estimation which includes resident population	ROAG_134899_01		143	45.1656	25.6137	Valea Bradului	RO316	0.549406	0.082082
Charge moyenne maximale hebdomadaire qui pénètre dans la station d'épuration au cours de l'année, à l'exclusion des situations inhabituelles comme celles qui sont dues à de fortes précipitations + rejets directs sans traitement par déversoirs d'orage	FR040000129018	0	143	48.3547	-3.83118	BRENNILIS	FRH02	0.549406	0.082082
Estimation which includes resident population	ROAG_80766	0	141	44.9001	23.7006	Logresti	RO412	0.541722	0.080934
Estimation	ROAG_52179_08	0	137	45.1192	22.4412	Cozia	RO422	0.526354	0.078638
Estimation	ROAG_52794_05	0	137	45.5043	21.8038	Valea Mare	RO422	0.526354	0.078638
Estimation	ROAG_51127_04	0	136	45.0615	21.7779	Marila	RO422	0.522512	0.078064
Estimation which includes resident population	ROAG_1103296_08		135	44.892	22.7346	Runcsorul	RO413	0.51867	0.07749
Estimation which includes resident population	ROAG_1103296_09		133	44.8829	22.8885	Sardanesti	RO413	0.510986	0.076342
Calculated the sum of the data of the total wastewater load of the settlements constituting the agglomeration	HU-AGGL-AOT192		132	46.7269	16.7028	Barlahida - Szennyvizelvezetesi Agglomeracio	HU223	0.507144	0.075768
Estimation	ROAG_52179_36	0	131	45.089	22.4652	Zanogi	RO422	0.503302	0.075194
Charge moyenne maximale hebdomadaire qui pénètre dans la station d'épuration au cours de l'année, à l'exclusion des situations inhabituelles comme celles qui sont dues à de fortes précipitations + rejets directs sans traitement par déversoirs d'orage	FR010000159118	0	131	50.0331	3.47176	BUSIGNY	FRE11	0.503302	0.075194
Calculated the sum of the data of the total wastewater load of the settlements constituting the agglomeration	HU-AGGL-AHW799		131	48.5544	21.3519	Keked - Szennyvizelvezetesi Agglomeracio	HU311	0.503302	0.075194
Calculated the sum of the data of the total wastewater load of the settlements constituting the agglomeration	HU-AGGL-AIQ722		130	48.0167	19.6886	Kisbarkany - Szennyvizelvezetesi Agglomeracio	HU313	0.49946	0.07462
Charge moyenne maximale hebdomadaire qui pénètre dans la station d'épuration au cours de l'année, à l'exclusion des situations inhabituelles comme celles qui sont dues à de fortes précipitations + rejets directs sans traitement par déversoirs d'orage	FR090000197312	0	128	5.23826	-53.0126	SINNAMARY	FRY30	0.491776	0.073472
Estimation	ROAG_52179_06	0	127	45.041	22.409	Ciresel	RO422	0.487934	0.072898
Calculation which includes resident population, economic activities, tourism, seasonal changes (connected or not), industries discharging into networks/WWTP (max average weekly loads	ROAG_75356_06		124	46.1107	27.9513	Prodanesti	RO224	0.476408	0.071176
Estimation	ROAG_52179_38	0	117	45.0561	22.3644	Zmogotin	RO422	0.449514	0.067158
Calculated the sum of the data of the total wastewater load of the settlements constituting the agglomeration	HU-AGGL-ANT983		117	46.3222	17.2269	Kaszo - Szennyvizelvezetesi Agglomeracio	HU232	0.449514	0.067158
ESTIMADO	ES8160020001010	0	113	39.91	-2.98748	EL ACEBRÓN	ES423	0.434146	0.064862
Estimation which includes resident population	ROAG_135404_01		113	45.1769	26.1385	Pacuri	RO316	0.434146	0.064862
Estimation	ROAG_52179_05	0	111	45.1123	22.4745	Camena	RO422	0.426462	0.063714
Calculated the sum of the data of the total wastewater load of the settlements constituting the agglomeration	HU-AGGL-AIE225		111	48.3425	20.8706	Hegymeg - Szennyvizelvezetesi Agglomeracio	HU311	0.426462	0.063714
Calculation which includes resident population, economic activities, tourism, seasonal changes (connected or not), industries discharging into networks/WWTP (max average weekly loads), IAS	ROAG_175144	0	109	45.7398	26.8377	Andreiasu	RO226	0.418778	0.062566
Estimation which includes resident population	ROAG_133964_01		109	44.9563	26.5307	Satu Nou	RO316	0.418778	0.062566
SEGUN ESQUEMA GENERAL DE CALCULO	ES13281330001011	0	105	40.3893	-4.35631	SAN MARTIN NORESTE	ES300	0.40341	0.06027
Estimation	ROAG_52703_01	0	104	45.2295	21.6991	Calina	RO422	0.399568	0.059696
Estimation which includes resident population	ROAG_1103296_02		104	44.9134	22.8295	Bratesul	RO413	0.399568	0.059696
SEGUN ESQUEMA GENERAL DE CALCULO	ES13281330001012	0	103	40.3981	-4.3845	SAN MARTIN NORTE	ES300	0.395726	0.059122
Calculated the sum of the data of the total wastewater load of the settlements constituting the agglomeration	HU-AGGL-ALV134		100	47.9567	19.5494	Kutaso - Szennyvizelvezetesi Agglomeracio	HU313	0.3842	0.0574
Estimation which includes resident population	ROAG_134755_06		99	45.2086	26.109	Tulburea	RO316	0.380358	0.056826
Estimation which includes resident population	ROAG_79406_01	0	98	44.9734	23.6882	Motorgi	RO412	0.376516	0.056252
Estimation which includes resident population	ROAG_132896_08		97	45.268	26.1111	Poiana Mierlei	RO316	0.372674	0.055678
Estimation	ROAG_52179_33	0	94	45.1231	22.455	Sub Plai	RO422	0.361148	0.053956
Calculated the sum of the data of the total wastewater load of the settlements constituting the agglomeration	HU-AGGL-AIQ388		94	48.4281	21.5436	Vagashuta - Szennyvizelvezetesi Agglomeracio	HU311	0.361148	0.053956
Estimation	ROAG_52179_21	0	94	45.0722	22.4027	Negiudin	RO422	0.361148	0.053956
(PROMEDIO ANUAL CAUDAL TRATADO(M3/D)* PROMEDIO ANUAL DE CONCENTRACIÃ“N DBO5 (MG/L) DEL INFLUENTE) / 60	ES9081660001010	0	94	42.246	1.97559	POBLA DE LILLET (LA)	ES511	0.361148	0.053956
Estimation which includes resident population	ROAG_91241_03	0	91	45.5855	22.9391	Vadu	RO423	0.349622	0.052234
Estimation	ROAG_53862_16	0	91	44.6956	21.8445	Zanou	RO422	0.349622	0.052234
Calculated the sum of the data of the total wastewater load of the settlements constituting the agglomeration	HU-AGGL-AIE201		91	48.4231	20.5542	Imola - Szennyvizelvezetesi Agglomeracio	HU311	0.349622	0.052234
Estimation	ROAG_52179_28	0	90	45.0284	22.4684	Rustin	RO422	0.34578	0.05166
Calculated the sum of the data of the total wastewater load of the settlements constituting the agglomeration	HU-AGGL-AIE307		90	47.8339	19.8989	Gyongyosoroszi - Karolytaro - Szennyvizelvezetesi Agglomeracio	HU312	0.34578	0.05166
Estimation which includes resident population	ROAG_82136_05	0	89	45.0854	23.2567	Balani	RO412	0.341938	0.051086
Estimation	ROAG_52179_14	0	89	45.059	22.4372	Hora Mare	RO422	0.341938	0.051086
Calculated the sum of the data of the total wastewater load of the settlements constituting the agglomeration	HU-AGGL-AIQ379		88	48.3783	20.4361	Gomorszolos - Szennyvizelvezetesi Agglomeracio	HU311	0.338096	0.050512
Estimation	ROAG_52179_17	0	87	45.0677	22.4061	Izvor	RO422	0.334254	0.049938
Estimation	ROAG_51458_02	0	86	44.6293	22.0038	Cozla	RO422	0.330412	0.049364
Calculation which includes resident population, economic activities, tourism, seasonal changes (connected or not), industries discharging into networks/WWTP (max average weekly loads	ROAG_75356_01		86	46.1478	27.9021	Sipote	RO224	0.330412	0.049364
Estimation	ROAG_52179_27	0	86	45.0605	22.4299	Prislop	RO422	0.330412	0.049364
Estimation which includes resident population	ROAG_111480_03		82	44.5046	22.7132	Dunarea Mica	RO413	0.315044	0.047068
Estimation	ROAG_52179_19	0	82	45.0867	22.4596	Lunca Zaicii	RO422	0.315044	0.047068
Estimation which includes resident population	ROAG_111685_03		80	44.7778	22.9225	Livezi	RO413	0.30736	0.04592
Estimation which includes resident population	ROAG_46019_03		80	45.2918	26.7561	Caldarusa	RO222	0.30736	0.04592
Calculation which includes resident population, economic activities, tourism, seasonal changes (connected or not), industries discharging into networks/WWTP (max average weekly loads), IAS	ROAG_141722_02	0	77	47.2477	22.6447	Zauan Bai	RO116	0.295834	0.044198
Calculated the sum of the data of the total wastewater load of the settlements constituting the agglomeration	HU-AGGL-AHY492		69	48.5372	21.3506	Panyok - Szennyvizelvezetesi Agglomeracio	HU311	0.265098	0.039606
Estimation which includes resident population	ROAG_132896_07		69	45.2706	26.0561	Podurile	RO316	0.265098	0.039606
Calculation which includes resident population, economic activities, tourism, seasonal changes (connected or not), industries discharging into networks/WWTP (max average weekly loads	ROAG_38063_01		68	47.7227	26.5654	Baisa	RO212	0.261256	0.039032
Estimation which includes resident population	ROAG_47453_07		67	45.114	26.6108	Dobrilesti	RO222	0.257414	0.038458
Estimation	ROAG_54118_03	0	67	44.8578	21.3723	Parneaura	RO422	0.257414	0.038458
Estimation	ROAG_52124_03	0	64	44.939	21.654	Macoviste	RO422	0.245888	0.036736
Estimation	ROAG_54118_01	0	61	44.8166	21.3899	Bazias	RO422	0.234362	0.035014
Carga anual media	ES10460920000000	0	61	40.1259	-1.30146	CASTIELFABIB	ES523	0.234362	0.035014
Calculated the sum of the data of the total wastewater load of the settlements constituting the agglomeration	HU-AGGL-AOJ277		60	48.3753	20.9533	Nyesta - Szennyvizelvezetesi Agglomeracio	HU311	0.23052	0.03444
Estimation	ROAG_52179_39	0	59	45.0551	22.4536	Zoina	RO422	0.226678	0.033866
Calculation which includes resident population, economic activities, tourism, seasonal changes (connected or not), industries discharging into networks/WWTP (max average weekly loads), IAS	ROAG_142952_03	0	59	47.1292	22.7662	Ratovei	RO116	0.226678	0.033866
Estimation	ROAG_52179_18	0	59	45.0762	22.4482	Lunca Florii	RO422	0.226678	0.033866
Calculated the sum of the data of the total wastewater load of the settlements constituting the agglomeration	HU-AGGL-AOT151		58	46.7064	17.0667	Zalaszentmarton - Szennyvizelvezetesi agglomeracio	HU223	0.222836	0.033292
Estimation which includes resident population	ROAG_46019_04		58	45.2822	26.7595	Vladeni	RO222	0.222836	0.033292
Estimation	ROAG_52179_25	0	57	44.993	22.4451	Poiana Lunga	RO422	0.218994	0.032718
Estimation which includes resident population	ROAG_79406_02	0	56	44.9647	23.6844	Cionti	RO412	0.215152	0.032144
Estimation	ROAG_52179_31	0	56	45.0641	22.4642	Studena	RO422	0.215152	0.032144
Calculated the sum of the data of the total wastewater load of the settlements constituting the agglomeration	HU-AGGL-AOT160		56	46.5017	16.8169	Valkonya - Szennyvizelvezetesi Agglomeracio	HU223	0.215152	0.032144
Estimation	ROAG_52179_22	0	55	45.0604	22.4331	Obita	RO422	0.21131	0.03157
Estimation	ROAG_52179_13	0	54	45.1096	22.4222	Gruni	RO422	0.207468	0.030996
Estimation which includes resident population	ROAG_1103296_04		54	44.8637	22.8889	Campu Mare	RO413	0.207468	0.030996
Estimation which includes resident population	ROAG_46019_02		50	45.3179	26.7863	Baesti	RO222	0.1921	0.0287
Estimation	ROAG_53862_03	0	49	44.6953	21.8455	Carsie	RO422	0.188258	0.028126
Calculation which includes resident population, economic activities, tourism, seasonal changes (connected or not), industries discharging into networks/WWTP (max average weekly loads	ROAG_75356_04		49	46.0554	27.9483	Onciu	RO224	0.188258	0.028126
Estimation	ROAG_52179_10	0	49	45.0251	22.4124	Cracu Teiului	RO422	0.188258	0.028126
Calculated the sum of the data of the total wastewater load of the settlements constituting the agglomeration	HU-AGGL-AIQ671		49	48.5544	21.3519	Felso-Keked - Szennyvizelvezetesi Agglomeracio	HU311	0.188258	0.028126
Estimation	ROAG_54626_03	0	47	45.4	22.5512	Poiana Marului	RO422	0.180574	0.026978
Calculated the sum of the data of the total wastewater load of the settlements constituting the agglomeration	HU-AGGL-AIY169		47	47.9853	19.6472	Garab - Szennyvizelvezetesi Agglomeracio	HU313	0.180574	0.026978
(PROMEDIO ANUAL CAUDAL TRATADO(M3/D)* PROMEDIO ANUAL DE CONCENTRACIÃ“N DBO5 (MG/L) DEL INFLUENTE) / 60	ES9251830004010	0	46	42.4466	1.13505	RIALP	ES513	0.176732	0.026404
Estimation	ROAG_52179_23	0	45	45.0441	22.4068	Pogara	RO422	0.17289	0.02583
Estimation	ROAG_52179_30	0	45	45.0536	22.447	Strugasca	RO422	0.17289	0.02583
Estimation	ROAG_53862_05	0	41	44.6977	21.8479	Crusovita	RO422	0.157522	0.023534
Estimation	ROAG_53862_14	0	39	44.6958	21.851	Valea Ravensca	RO422	0.149838	0.022386
Carga anual media	ES10460770000000	0	38	39.4416	-0.758379	BUNOL (P,I, LLANO DE BUNOL)	ES523	0.145996	0.021812
Calculated the sum of the data of the total wastewater load of the settlements constituting the agglomeration	HU-AGGL-AHY279		37	46.7672	16.3481	Magyarszombatfa - Szennyvizelvezetesi Agglomeracio	HU222	0.142154	0.021238
Estimation	ROAG_53862_15	0	36	44.6956	21.8445	Valea Sichevitei	RO422	0.138312	0.020664
Estimation	ROAG_52179_12	0	36	45.0781	22.4499	Dolina	RO422	0.138312	0.020664
Estimation	ROAG_52179_15	0	35	45.0418	22.4319	Hora Mica	RO422	0.13447	0.02009
Estimation	ROAG_52179_20	0	34	45.0359	22.3822	Mesteacan	RO422	0.130628	0.019516
Estimation	ROAG_54421_02	0	33	45.3901	22.3338	Cicleni	RO422	0.126786	0.018942
Estimation	ROAG_52179_04	0	32	45.0774	22.4248	Borugi	RO422	0.122944	0.018368
Estimation which includes resident population	ROAG_134755_07		32	45.2116	26.0996	Tulburea Valeni	RO316	0.122944	0.018368
Estimation	ROAG_52179_34	0	31	45.0643	22.4176	Tatu	RO422	0.119102	0.017794
Estimation	ROAG_53862_17	0	31	44.7003	21.8431	Zasloane	RO422	0.119102	0.017794
Estimation	ROAG_52179_26	0	30	45.0843	22.4046	Prisacina	RO422	0.11526	0.01722
Estimation	ROAG_52179_07	0	29	45.0501	22.411	Costis	RO422	0.111418	0.016646
Estimation which includes resident population	ROAG_132896_03		27	45.2406	26.0841	Ciocrac	RO316	0.103734	0.015498
Estimation which includes resident population	ROAG_132896_05		27	45.223	26.0682	Pițigoi	RO316	0.103734	0.015498
Estimation	ROAG_52179_09	0	25	45.0129	22.517	Cracu Mare	RO422	0.09605	0.01435
Estimation	ROAG_53862_08	0	25	44.6769	21.768	Liborajdea	RO422	0.09605	0.01435
Estimation	ROAG_52589_01	0	24	44.8413	21.9165	Barz	RO422	0.092208	0.013776
Estimation	ROAG_52179_11	0	23	44.999	22.4748	Dobraia	RO422	0.088366	0.013202
Estimation which includes resident population	ROAG_151237		22	47.5298	26.4094	Vulturesti	RO215	0.084524	0.012628
Estimation which includes resident population	ROAG_132896_06		20	45.2174	26.0834	Plai	RO316	0.07684	0.01148
Estimation	ROAG_53862_10	0	19	44.6932	21.8458	Martinovat	RO422	0.072998	0.010906
Estimation which includes resident population	ROAG_134755_04		19	45.1862	26.1316	Sarari	RO316	0.072998	0.010906
Estimation	ROAG_52589_02	0	19	44.8203	21.8906	Boina	RO422	0.072998	0.010906
Estimation	ROAG_53862_09	0	16	44.69	21.8478	Lucacevat	RO422	0.061472	0.009184
Estimation	ROAG_53862_01	0	16	44.6956	21.8445	Brestelnic	RO422	0.061472	0.009184
Estimation	ROAG_53862_04	0	15	44.6956	21.8445	Cracu Almaj	RO422	0.05763	0.00861
Estimation	ROAG_52179_16	0	15	45.0347	22.5261	Inelet	RO422	0.05763	0.00861
Estimation	ROAG_51582_01	0	13	44.9261	21.9991	Poneasca	RO422	0.049946	0.007462
Estimation	ROAG_53862_07	0	13	44.7027	21.8403	Frasinis	RO422	0.049946	0.007462
Estimation	ROAG_52589_03	0	13	44.8336	21.9276	Prislop	RO422	0.049946	0.007462
Estimation which includes resident population	ROAG_135431_03		12	44.8173	25.9234	Coceana	RO316	0.046104	0.006888
Calculation which includes resident population, economic activities, tourism, seasonal changes (connected or not), industries discharging into networks/WWTP (max average weekly loads	ROAG_38063_04		12	47.8077	26.5161	Cervicesti-Deal	RO212	0.046104	0.006888
Estimation	ROAG_53862_02	0	11	44.6951	21.8417	Camenita	RO422	0.042262	0.006314
Estimation	ROAG_53862_06	0	11	44.7215	21.8027	Curmatura	RO422	0.042262	0.006314
Estimation	ROAG_53862_11	0	7	44.6946	21.8385	Ogasu Podului	RO422	0.026894	0.004018
Estimation	ROAG_53862_13	0	6	44.706	21.8369	Valea Orevita	RO422	0.023052	0.003444
Estimation	ROAG_51582_03	0	5	45.0179	21.9116	Valea Minisului	RO422	0.01921	0.00287
Estimation	ROAG_51458_03	0	4	44.6383	21.9739	Drencova	RO422	0.015368	0.002296
Estimation which includes resident population	ROAG_134648_03		3	45.2553	26.1398	Merdeala	RO316	0.011526	0.001722
Estimation	ROAG_53862_12	0	3	44.7033	21.8591	Streneac	RO422	0.011526	0.001722
C	UKENTH_Agg000048		0	51.5074	-1.24351	Compton	UKJ11	0	0
Total agglomeration load=number of inhabitants (national census 2011)+ industry load + turism load (loads from maximum average week)	HRAG_0005030		0	46.0864	16.9523	Novigrad Podravski	HR045	0	0
E	UKENSW_Agg000152		0	51.2947	-2.43337	Radstock / Midsomer Norton	UKK12	0	0
Agglomeration ended	SE_AGGLO_1522		0	60.6809	13.6964	AGGLO_TANDADALEN	SE312	0	0
Ausbaugröße mal durchschnittlicher Auslastungsgrad im Berichtsjahr	DEAG_BW3155100000039		0	47.9391	8.08133	Breitnau	DE132	0	0
popolazione stanziale + popolazione fluttuante + popolazione industriale	IT03160121000094		0			AG01606201_CASTELLI_CALEPIO	ITC46	0	0
Calculated the sum of the data of the total wastewater load of the settlements constituting the agglomeration	HU-AGGL-AHX400		0	47.2889	19.8532	Tapioszolos - Szennyvizelvezetesi Agglomeracio	HU120	0	0
Agglomeration ended	SE_AGGLO_1336		0	60.6769	15.0951	AGGLO_INSJOEN	SE312	0	0
C	UKSC_Agg00099		0	57.274	-2.368	Inverurie	UKM50	0	0
Agglomeration ended	SE_AGGLO_1508		0	57.9908	11.5566	AGGLO_SKAERHAMN	SE232	0	0
C	UKENAN_Agg000212		0	52.5578	1.36801	Poringland	UKH17	0	0
Calculated the sum of the data of the total wastewater load of the settlements constituting the agglomeration	HU-AGGL-AGQ966		0	47.9103	20.9542	Hejobaba - Szennyvizelvezetesi Agglomeracio	HU311	0	0
Residenti+fluttuanti+reflui industriali in fognatura	IT1982027_02		0	38.0295	13.9725	CEFALU__SETTEFRATI/MAZZAFORNO	ITG12	0	0
Total agglomeration load=number of inhabitants (national census 2011)+ industry load + turism load (loads from maximum average week)	HRAG_0101321		0	43.6983	16.7279	Otok	HR035	0	0
Calculated the sum of the data of the total wastewater load of the settlements constituting the agglomeration	HU-AGGL-AGN851		0	46.6844	18.6672	Bikacs - Szennyvizelvezetesi Agglomeracio	HU233	0	0
Calculated the sum of the data of the total wastewater load of the settlements constituting the agglomeration	HU-AGGL-AHX693		0	46.5565	16.7844	Banokszentgyorgy - Szennyvizelvezetesi Agglomeracio	HU223	0	0
Residenti+fluttuanti+reflui industriali in fognatura	IT1982021_02		0	38.1687	13.1827	CARINI_VILLAGRAZIA_DI_CARINI (ORA ASI CARINI VILLAGRAZIA)	ITG12	0	0
Calculated the sum of the data of the total wastewater load of the settlements constituting the agglomeration	HU-AGGL-APW335		0	47.9758	20.8867	Hejokeresztur - Szennyvizelvezetesi Agglomeracio	HU311	0	0
C	UKENNW_Agg000151		0	54.9109	-2.8248	WARWICK BRIDGE AND DISTRICT STW HUMUS	UKD12	0	0
C	UKENTH_Agg000084		0	51.4013	-0.290706	London Worcester Park (Hogsmill Valley)	UKI63	0	0
Total agglomeration load=number of inhabitants (national census 2011)+ industry load + turism load (loads from maximum average week)	HRAG_0101045		0	45.9365	15.7317	Donji Kraj	HR042	0	0
Calculated the sum of the data of the total wastewater load of the settlements constituting the agglomeration	HU-AGGL-AHX119		0	46.889	21.3487	Okany - Szennyvizelvezetesi Agglomeracio	HU332	0	0
Calculated the sum of the data of the total wastewater load of the settlements constituting the agglomeration	HU-AGGL-AGN805		0	46.5356	18.1917	Kocsola - Szennyvizelvezetesi agglomeracio	HU233	0	0
Agglomeration ended	SE_AGGLO_1272		0	57.2348	12.1219	AGGLO_BUA	SE231	0	0
Calculated the sum of the data of the total wastewater load of the settlements constituting the agglomeration	HU-AGGL-AHX118		0	46.9706	17.1764	Ohid - Szennyvizelvezetesi Agglomeracio	HU223	0	0
	IT1300000125		0			GIULIANOVA_COLLERANESCO		0	0
Total agglomeration load=number of inhabitants (national census 2011)+ industry load + turism load (loads from maximum average week)	HRAG_0101091		0	44.1781	15.175	Petrčane	HR033	0	0
Total agglomeration load=number of inhabitants (national census 2011)+ industry load + turism load (loads from maximum average week)	HRAG_0101496		0	43.4745	16.574	Podstrana	HR035	0	0
Ausbaugröße mal durchschnittlicher Auslastungsgrad im Berichtsjahr	DEAG_BW2355100000121		0	48.6605	8.69695	Neubulach	DE12A	0	0
Calculated the sum of the data of the total wastewater load of the settlements constituting the agglomeration	HU-AGGL-AHY204		0	47.3165	21.666	Konyar - Szennyvizelvezetesi Agglomeracio	HU321	0	0
Ausbaugröße mal durchschnittlicher Auslastungsgrad im Berichtsjahr	DEAG_BW1185100000029		0	48.8773	9.27392	Remseck-Neckarrems	DE115	0	0
C	UKENTH_Agg000115		0	51.6007	0.251049	Nags Head Lane	UKI52	0	0
Total agglomeration load=number of inhabitants (national census 2011)+ industry load + turism load (loads from maximum average week)	HRAG_0001161		0	44.5185	14.5026	Veli Lošinj	HR031	0	0
Calculated the sum of the data of the total wastewater load of the settlements constituting the agglomeration	HU-AGGL-AHX653		0	48.2062	22.253	Aranyosapati - Szennyvizelvezetesi Agglomeracio	HU323	0	0
Total agglomeration load=number of inhabitants (national census 2011)+ industry load + turism load (loads from maximum average week)	HRAG_0006030		0	45.8842	16.7657	Gudovac	HR047	0	0
Calculated the sum of the data of the total wastewater load of the settlements constituting the agglomeration	HU-AGGL-APW337		0	47.7606	20.1092	Detk - Szennyvizelvezetesi Agglomeracio	HU312	0	0
C	UKENTH_Agg000090		0	51.5452	-0.805933	Hurley STW	UKJ11	0	0
Calculated the sum of the data of the total wastewater load of the settlements constituting the agglomeration	HU-AGGL-AIX742		0	47.7751	19.4589	Erdokurt - Szennyvizelvezetesi Agglomeracio	HU313	0	0
Calculated the sum of the data of the total wastewater load of the settlements constituting the agglomeration	HU-AGGL-AHY089		0	47.8332	19.6864	Jobbagyi - Szennyvizelvezetesi Agglomeracio	HU313	0	0
Calculated the sum of the data of the total wastewater load of the settlements constituting the agglomeration	HU-AGGL-AGN809		0	46.5861	18.3939	Regoly - Szennyvizelvezetesi Agglomeracio	HU233	0	0
Calculated the sum of the data of the total wastewater load of the settlements constituting the agglomeration	HU-AGGL-AHX654		0	48.1685	20.2259	Arlo - Szennyvizelvezetesi Agglomeracio	HU311	0	0
Calculated the sum of the data of the total wastewater load of the settlements constituting the agglomeration	HU-AGGL-AHW793		0	46.0261	19.2115	Katymar - Szennyvizelvezetesi Agglomeracio	HU331	0	0
Calculated the sum of the data of the total wastewater load of the settlements constituting the agglomeration	HU-AGGL-AJA008		0	45.8593	17.9838	Vajszlo - Szennyvizelvezetesi Agglomeracio	HU231	0	0
Calculated the sum of the data of the total wastewater load of the settlements constituting the agglomeration	HU-AGGL-AJF366		0	46.795	18.0283	Lulla - Szennyvizelvezetesi Agglomeracio	HU232	0	0
Calculated the sum of the data of the total wastewater load of the settlements constituting the agglomeration	HU-AGGL-AHX196		0	46.6911	18.4213	Pincehely - Szennyvizelvezetesi Agglomeracio	HU233	0	0
Calculated the sum of the data of the total wastewater load of the settlements constituting the agglomeration	HU-AGGL-AGR014		0	47.8933	20.6925	Bukkabrany - Szennyvizelvezetesi Agglomeracio	HU311	0	0
Calculated the sum of the data of the total wastewater load of the settlements constituting the agglomeration	HU-AGGL-AHW926		0	47.3048	18.5556	Lovasbereny - Szennyvizelvezetesi Agglomeracio	HU211	0	0
Calculated the sum of the data of the total wastewater load of the settlements constituting the agglomeration	HU-AGGL-AHX339		0	48.076	22.6139	Szatmarcseke - Szennyvizelvezetesi Agglomeracio	HU323	0	0
Calculated the sum of the data of the total wastewater load of the settlements constituting the agglomeration	HU-AGGL-AIY794		0	47.9697	20.9847	Girincs - Szennyvizelvezetesi agglomeracio	HU311	0	0
Calculated the sum of the data of the total wastewater load of the settlements constituting the agglomeration	HU-AGGL-AGR482		0	47.1297	17.3578	Somlojeno - Szennyvizelvezetesi Agglomeracio	HU213	0	0
Calculated the sum of the data of the total wastewater load of the settlements constituting the agglomeration	HU-AGGL-AGT900		0	47.4126	16.9497	Csafordjanosfa - Szennyvizelvezetesi Agglomeracio	HU221	0	0
Calculated the sum of the data of the total wastewater load of the settlements constituting the agglomeration	HU-AGGL-AHW754		0	47.0452	20.0344	Jaszkarajeno - Szennyvizelvezetesi Agglomeracio	HU120	0	0
Calculated the sum of the data of the total wastewater load of the settlements constituting the agglomeration	HU-AGGL-AHY541		0	48.0829	21.2446	Prugy - Szennyvizelvezetesi Agglomeracio	HU311	0	0
Calculated the sum of the data of the total wastewater load of the settlements constituting the agglomeration	HU-AGGL-AJX810		0	47.2075	21.3442	Nagyrabe - Szennyvizelvezetesi Agglomeracio	HU321	0	0
Calculated the sum of the data of the total wastewater load of the settlements constituting the agglomeration	HU-AGGL-AHX367		0	46.1489	18.8889	Szeremle - Szennyvizelvezetesi Agglomeracio	HU331	0	0
applied weighing factor: combined treated load from connected UWTTP's x 1.013	NLA13045	0	0	52.2681	4.77617	AALSMEER	NL329	0	0
Calculated the sum of the data of the total wastewater load of the settlements constituting the agglomeration	HU-AGGL-AEC128		0	47.4	17.5233	Vaszar - Szennyvizelvezetesi agglomeracio	HU213	0	0
Calculated the sum of the data of the total wastewater load of the settlements constituting the agglomeration	HU-AGGL-AHX435		0	47.3161	20.4964	Tiszabo - Szennyvizelvezetesi Agglomeracio	HU322	0	0
applied weighing factor: combined treated load from connected UWTTP's x 1.013	NLA13036	0	0	52.1896	4.66517	RIJNSATERWOUDE	NL337	0	0
Calculated the sum of the data of the total wastewater load of the settlements constituting the agglomeration	HU-AGGL-AJX843		0	47.4441	20.5074	Tiszabura - Szennyvizelvezetesi Agglomeracio	HU322	0	0
Calculated the sum of the data of the total wastewater load of the settlements constituting the agglomeration	HU-AGGL-ARY716		0	46.8	18.3056	Felsonyek - Szennyvizelvezetesi Agglomeracio	HU233	0	0
applied weighing factor: combined treated load from connected UWTTP's x 1.013	NLA01036	0	0	53.2131	6.5114	GRONINGEN	NL113	0	0
Calculated the sum of the data of the total wastewater load of the settlements constituting the agglomeration	HU-AGGL-AJF282		0	48.1908	20.2078	Borsodszentgyorgy - Szennyvizelvezetesi agglomeracio	HU311	0	0
Calculated the sum of the data of the total wastewater load of the settlements constituting the agglomeration	HU-AGGL-AGN763		0	45.8525	17.7125	Felsoszentmarton - Szennyvizelvezetesi Agglomeracio	HU231	0	0
applied weighing factor: combined treated load from connected UWTTP's x 1.013	NLA13011	0	0	52.2723	4.72493	RIJSENHOUT	NL329	0	0
Calculated the sum of the data of the total wastewater load of the settlements constituting the agglomeration	HU-AGGL-AGN751		0	46.3628	18.0147	Nagyberki - Szennyvizelvezetesi agglomeracio	HU232	0	0
C	UKENTH_Agg000028		0	51.8085	-1.62938	Burford, Oxon	UKJ14	0	0
C	UKENMI_Agg000035		0	52.4965	-1.39311	Bramcote/Wolvey	UKG13	0	0
Agglomeration ended	SE_AGGLO_1539		0	55.6346	13.496	AGGLO_VEBEROD	SE224	0	0
Ausbaugröße mal durchschnittlicher Auslastungsgrad im Berichtsjahr	DEAG_BW4175100000001		0	48.3279	8.9356	Bisingen-Wessingen	DE143	0	0
Ausbaugröße mal durchschnittlicher Auslastungsgrad im Berichtsjahr	DEAG_BW4365100000039		0	47.9291	9.42424	Königseggwald	DE148	0	0
Calculated the sum of the data of the total wastewater load of the settlements constituting the agglomeration	HU-AGGL-AOT198		0	47.3544	16.8864	Hegyfalu - Szennyvizelvezetesi Agglomeracio	HU222	0	0
C	UKENMI_Agg000285		0	53.322	-1.64674	Hathersage	UKF13	0	0
Calculated the sum of the data of the total wastewater load of the settlements constituting the agglomeration	HU-AGGL-AHW483		0	46.1972	19.1569	Csavoly - Szennyvizelvezetesi Agglomeracio	HU331	0	0
Calculated the sum of the data of the total wastewater load of the settlements constituting the agglomeration	HU-AGGL-AHX816		0	47.8969	22.6806	Csegold - Szennyvizelvezetesi Agglomeracio	HU323	0	0
Residenti+fluttuanti+reflui industriali in fognatura	IT1982055_01		0	37.8006	14.1081	PETRALIA_SOPRANA	ITG12	0	0

## Sheet: Table S3
reportingYear	Facility_INSPIRE_ID	parentCompanyName	nameOfFeature	mainActivityCode	mainActivityName	lon	lat	streetName	buildingNumber	postalCode	city	countryCode	Biogenic CO2 (Mtons CO2)	Fossil CO2 (Mtons CO2)
2017	AT.CAED/9008390933787.FACILITY	Wiener Stadtwerke GmbH	WIEN ENERGIE GmbH	5(b)	Installations for the incineration of non-hazardous waste in the scope of Directive 2000/76/EC of the European Parliament and of the Council of 4 December 2000 on the incineration of waste	16.3599	48.2339	Spittelauer Lände	45	1090	Wien,Alsergrund	AT	0.11417	0.09087
2017	AT.CAED/9008390973899.FACILITY	Energie AG Oberösterreich Umwelt GmbH	Energie AG Oberösterreich Umwelt Service GmbH	5(b)	Installations for the incineration of non-hazardous waste in the scope of Directive 2000/76/EC of the European Parliament and of the Council of 4 December 2000 on the incineration of waste	14.0761	48.1698	Mitterhoferstraße	100	4600	Wels	AT	0.15484	0.12324
2017	AT.CAED/9008391178545.FACILITY	Wiener Stadtwerke GmbH	WIEN ENERGIE GmbH	5(b)	Installations for the incineration of non-hazardous waste in the scope of Directive 2000/76/EC of the European Parliament and of the Council of 4 December 2000 on the incineration of waste	16.2895	48.2069	Flötzersteig	12	1160	Wien,Ottakring	AT	0.0931	0.0741
2017	AT.CAED/9008391181606.FACILITY	Wiener Stadtwerke GmbH	WIEN ENERGIE GmbH	5(b)	Installations for the incineration of non-hazardous waste in the scope of Directive 2000/76/EC of the European Parliament and of the Council of 4 December 2000 on the incineration of waste	16.4605	48.1739	11.Haidequerstraße	6	1110	Wien,Simmering	AT	0.1568	0.1248
2017	AT.CAED/9008391215691.FACILITY	FCC Austria Abfall Sevice AG	FCC Zistersdorf Abfall Service GmbH	5(b)	Installations for the incineration of non-hazardous waste in the scope of Directive 2000/76/EC of the European Parliament and of the Council of 4 December 2000 on the incineration of waste	16.7835	48.5481	Am Ziegelwerk	4	2225	Zistersdorf	AT	0.08085	0.06435
2017	AT.CAED/9008391215707.FACILITY		Wiener Kommunal-Umweltschutzprojektgesellschaft mbH	5(b)	Installations for the incineration of non-hazardous waste in the scope of Directive 2000/76/EC of the European Parliament and of the Council of 4 December 2000 on the incineration of waste	16.4619	48.1762	Johann-Petrak-Gasse	7	1110	Wien,Simmering	AT	0.12642	0.10062
2017	AT.CAED/9008391215752.FACILITY	EVN AG	EVN Wärmekraftwerke GmbH	5(b)	Installations for the incineration of non-hazardous waste in the scope of Directive 2000/76/EC of the European Parliament and of the Council of 4 December 2000 on the incineration of waste	15.9324	48.3274	AVN Straße	1	3435	Dürnrohr	AT	0.22344	0.17784
2017	AT.CAED/9008391215769.FACILITY	UPM Kymmene Austria GmbH	EEVG Entsorgungs- und Energieverwertungsges.m.b.H.	5(b)	Installations for the incineration of non-hazardous waste in the scope of Directive 2000/76/EC of the European Parliament and of the Council of 4 December 2000 on the incineration of waste	13.7999	47.9923	Fabriksplatz	1	4662	Stötten	AT	0.07938	0.06318
2017	AT.CAED/9008391215820.FACILITY	RVL	RVL Reststoffverwertung Lenzing GmbH	5(b)	Installations for the incineration of non-hazardous waste in the scope of Directive 2000/76/EC of the European Parliament and of the Council of 4 December 2000 on the incineration of waste	13.6167	47.9756	p.A. Lenzing AG		4860	Alt Lenzing	AT	0.14847	0.11817
2017	BE.WA/001010000.FACILITY	ICDI SC	ICDI sc - Usine d'incinération	5(b)	Installations for the incineration of non-hazardous waste in the scope of Directive 2000/76/EC of the European Parliament and of the Council of 4 December 2000 on the incineration of waste	4.5446	50.4202	PORT DE LA PRAYE	1/	6250	AISEAU-PRESLES	BE	0.06909	0.05499
2017	BE.WA/003010000.FACILITY	IPALLE	IPALLE - Usine d'incinération	5(b)	Installations for the incineration of non-hazardous waste in the scope of Directive 2000/76/EC of the European Parliament and of the Council of 4 December 2000 on the incineration of waste	3.6272	50.5482	HAMEAU DE RIBONFOSSE	9/	7971	THUMAIDE	BE	0.2156	0.1716
2017	BE.WA/004010000.FACILITY	Intradel	INTRADEL - UVELIA - Usine d'incinération	5(b)	Installations for the incineration of non-hazardous waste in the scope of Directive 2000/76/EC of the European Parliament and of the Council of 4 December 2000 on the incineration of waste	5.645	50.6811	PORT DE HERSTAL - PRE WIGI	20/	4040	HERSTAL	BE	0.19747	0.15717
2017	CH.CAED/000000110.Facility	KEBAG AG	KEBAG AG	5(b)	Installations for the incineration of non-hazardous waste in the scope of Directive 2000/76/EC of the European Parliament and of the Council of 4 December 2000 on the incineration of waste	7.5706	47.2153	Emmenspitz		4528	Zuchwil	CH	0.13916	0.11076
2017	CH.CAED/000000206.Facility	Services industriels de Genève	Les Cheneviers / UIOM	5(b)	Installations for the incineration of non-hazardous waste in the scope of Directive 2000/76/EC of the European Parliament and of the Council of 4 December 2000 on the incineration of waste	6.0322	46.1942	40, Route de Verbois		1288	Aire-la-Ville	CH	0.14798	0.11778
2017	CH.CAED/000000223.Facility	SAIDEF Fribourg	SAIDEF Fribourg	5(b)	Installations for the incineration of non-hazardous waste in the scope of Directive 2000/76/EC of the European Parliament and of the Council of 4 December 2000 on the incineration of waste	7.1218	46.7725	Route de Châtillon	70	1725	Posieux	CH	0.05537	0.04407
2017	CH.CAED/000000227.Facility	TRIDEL Lausanne	TRIDEL Lausanne	5(b)	Installations for the incineration of non-hazardous waste in the scope of Directive 2000/76/EC of the European Parliament and of the Council of 4 December 2000 on the incineration of waste	6.6392	46.5277	Rue du Vallon	35	1005	Lausanne	CH	0.10339	0.08229
2017	CH.CAED/000000230.Facility	SATOM Monthey	SATOM Monthey	5(b)	Installations for the incineration of non-hazardous waste in the scope of Directive 2000/76/EC of the European Parliament and of the Council of 4 December 2000 on the incineration of waste	6.96	46.2781	Zone Industrielle Boeferrant		1870	Monthey	CH	0.08624	0.06864
2017	CH.CAED/000000231.Facility	GEKAL Buchs	GEKAL Buchs	5(b)	Installations for the incineration of non-hazardous waste in the scope of Directive 2000/76/EC of the European Parliament and of the Council of 4 December 2000 on the incineration of waste	8.1035	47.389	Im Lostorf	11	5033	Buchs AG	CH	0.07693	0.06123
2017	CH.CAED/000000270.Facility	KVA Turgi	KVA Turgi	5(b)	Installations for the incineration of non-hazardous waste in the scope of Directive 2000/76/EC of the European Parliament and of the Council of 4 December 2000 on the incineration of waste	8.2678	47.4844	k. A.		5300	Turgi	CH	0.06566	0.05226
2017	CH.CAED/000000274.Facility	IWB Basel	IWB Basel	5(b)	Installations for the incineration of non-hazardous waste in the scope of Directive 2000/76/EC of the European Parliament and of the Council of 4 December 2000 on the incineration of waste	7.5833	47.5467	Margarethenstrasse	40	4008	Basel	CH	0.11858	0.09438
2017	CH.CAED/000000278.Facility	KVA Linthgebiet	KVA Linth	5(b)	Installations for the incineration of non-hazardous waste in the scope of Directive 2000/76/EC of the European Parliament and of the Council of 4 December 2000 on the incineration of waste	9.04	47.135	im Fennen 1A		8867	Niederurnen	CH	0.06027	0.04797
2017	CH.CAED/000000279.Facility	GEVAG Trimmis	GEVAG Trimmis	5(b)	Installations for the incineration of non-hazardous waste in the scope of Directive 2000/76/EC of the European Parliament and of the Council of 4 December 2000 on the incineration of waste	9.5569	46.9161	Rheinstrasse		7201	Untervaz-Bahnhof	CH	0.05978	0.04758
2017	CH.CAED/000000280.Facility	VfA Buchs	VfA Buchs	5(b)	Installations for the incineration of non-hazardous waste in the scope of Directive 2000/76/EC of the European Parliament and of the Council of 4 December 2000 on the incineration of waste	9.4836	47.1756	Langäulistrasse	24	9470	Buchs SG	CH	0.10143	0.08073
2017	CH.CAED/000000283.Facility	KVA Thurgau	KVA Thurgau	5(b)	Installations for the incineration of non-hazardous waste in the scope of Directive 2000/76/EC of the European Parliament and of the Council of 4 December 2000 on the incineration of waste	9.1383	47.5575	Rüteliholzstrasse	5	8570	Weinfelden	CH	0.08134	0.06474
2017	CH.CAED/000000285.Facility	ERZ KHKW Josefstrasse	ERZ KHKW Josefstrasse	5(b)	Installations for the incineration of non-hazardous waste in the scope of Directive 2000/76/EC of the European Parliament and of the Council of 4 December 2000 on the incineration of waste	8.5222	47.3867	Josefstrasse		8005	Zürich	CH	0.06174	0.04914
2017	CH.CAED/000000286.Facility	ERZ KHKW Hagenholz	ERZ KHKW Hagenholz	5(b)	Installations for the incineration of non-hazardous waste in the scope of Directive 2000/76/EC of the European Parliament and of the Council of 4 December 2000 on the incineration of waste	8.5653	47.4142	Hagenholzstrasse	110	8050	Zürich	CH	0.13279	0.10569
2017	CH.CAED/000000287.Facility	KVA Winterthur	KVA Winterthur	5(b)	Installations for the incineration of non-hazardous waste in the scope of Directive 2000/76/EC of the European Parliament and of the Council of 4 December 2000 on the incineration of waste	8.7525	47.4981	Scheideggstrasse	50	8404	Winterthur	CH	0.11025	0.08775
2017	CH.CAED/000000289.Facility	KEZO Hinwil	KEZO Hinwil	5(b)	Installations for the incineration of non-hazardous waste in the scope of Directive 2000/76/EC of the European Parliament and of the Council of 4 December 2000 on the incineration of waste	8.8206	47.3083	Wildbachstrasse	2	8340	Hinwil	CH	0.10682	0.08502
2017	CH.CAED/000000290.Facility	KVA Limmattal	KVA Limmattal	5(b)	Installations for the incineration of non-hazardous waste in the scope of Directive 2000/76/EC of the European Parliament and of the Council of 4 December 2000 on the incineration of waste	8.403	47.4166	Reservatstrasse	5	8953	Dietikon	CH	0.05096	0.04056
2017	CH.CAED/000000362.Facility	ACR Giubiasco	ACR Giubiasco	5(b)	Installations for the incineration of non-hazardous waste in the scope of Directive 2000/76/EC of the European Parliament and of the Council of 4 December 2000 on the incineration of waste	8.9887	46.1722	Via del Piano		6512	Giubiasco	CH	0.09212	0.07332
2017	CH.CAED/000000367.Facility	AVAG KVA AG	AVAG KVA AG	5(b)	Installations for the incineration of non-hazardous waste in the scope of Directive 2000/76/EC of the European Parliament and of the Council of 4 December 2000 on the incineration of waste	7.6062	46.7621	Allmendstrasse	166	3600	Thun	CH	0.05537	0.04407
2017	CH.CAED/000000410.Facility	Energie Wasser Bern	Energiezentrale Forsthaus (KVA)	5(b)	Installations for the incineration of non-hazardous waste in the scope of Directive 2000/76/EC of the European Parliament and of the Council of 4 December 2000 on the incineration of waste	7.4139	46.9515	Murtenstrasse	100	3001	Bern	CH	0.0784	0.0624
2017	CH.CAED/000000417.Facility	Renergia Zentralschweiz AG	Renergia Zentralschweiz AG	5(b)	Installations for the incineration of non-hazardous waste in the scope of Directive 2000/76/EC of the European Parliament and of the Council of 4 December 2000 on the incineration of waste	8.376	47.1135	Wagmattplatz	1	6035	Perlen	CH	0.14063	0.11193
2017	CZ.MZP.A100/CZ26416675.FACILITY	Pražské služby, a.s.	Spalovna Malešice	5(b)	Installations for the incineration of non-hazardous waste in the scope of Directive 2000/76/EC of the European Parliament and of the Council of 4 December 2000 on the incineration of waste	14.5411	50.0789	Průmyslová	615/32	10800	Praha 10	CZ	0.11417	0.09087
2017	CZ.MZP.B642/CZ86471652.FACILITY	SAKO Brno, a.s.	SAKO Brno, a.s. - divize 3 ZEVO	5(b)	Installations for the incineration of non-hazardous waste in the scope of Directive 2000/76/EC of the European Parliament and of the Council of 4 December 2000 on the incineration of waste	16.667	49.1904	Jedovnická	4247/2	62800	Brno-Židenice	CZ	0.10682	0.08502
2017	DK.CAED/000105461.FACILITY	I/S Amager Ressourcecenter	I/S Amager Ressourcecenter	5(b)	Installations for the incineration of non-hazardous waste in the scope of Directive 2000/76/EC of the European Parliament and of the Council of 4 December 2000 on the incineration of waste	12.6196	55.684	Vindmøllevej	6	2300	København S	DK	0.06419	0.05109
2017	DK.CAED/000105658.FACILITY	Fjernvarme Fyn Affaldsenergi	Fjernvarme Fyn Affaldsenergi	5(b)	Installations for the incineration of non-hazardous waste in the scope of Directive 2000/76/EC of the European Parliament and of the Council of 4 December 2000 on the incineration of waste	10.4052	55.4278	Havnegade	120	5000	Odense C	DK	0.04998	0.03978
2017	DK.CAED/000105671.FACILITY	I/S RENO-NORD	I/S Reno-Nord, Energianlægget Aalborg	5(b)	Installations for the incineration of non-hazardous waste in the scope of Directive 2000/76/EC of the European Parliament and of the Council of 4 December 2000 on the incineration of waste	10.0157	57.0245	Troensevej	2	9220	Aalborg Øst	DK	0.09555	0.07605
2017	DK.CAED/000106172.FACILITY	AFFALDSSELSKABET VENDSYSSEL VEST I/S	AVV I/S Energianlæg	5(b)	Installations for the incineration of non-hazardous waste in the scope of Directive 2000/76/EC of the European Parliament and of the Council of 4 December 2000 on the incineration of waste	10.032	57.4531	Miljøvej	7	9800	Hjørring	DK	0.05341	0.04251
2017	ES.CAED/000132000.FACILITY	TIRME, S.A.	TIRME,S.A. COMPLEJO DE TRATAMIENTO INTEGRAL DE RESIDUOS URBANOS DE SON REUS	5(b)	Installations for the incineration of non-hazardous waste in the scope of Directive 2000/76/EC of the European Parliament and of the Council of 4 December 2000 on the incineration of waste	2.68539	39.6452	SÓLLER KM 8.2	S/N	07120	PALMA	ES	0.25039	0.19929
2017	ES.CAED/003455000.FACILITY	URBASER, S.A.	URBASER, S.A. (ANTES TIRMADRID, S.A.)	5(b)	Installations for the incineration of non-hazardous waste in the scope of Directive 2000/76/EC of the European Parliament and of the Council of 4 December 2000 on the incineration of waste	-3.59924	40.3354	CAÑADA REAL DE MERINAS	S/N	28051	MADRID	ES	0.04998	0.03978
2017	ES.CAED/004857000.FACILITY	TRACTAMENT I SELECCIÓ DE RESIDUS, SA	PLANTA DE VALORITZACIO ENERGETICA DE SANT ADRIA DE BESOS	5(b)	Installations for the incineration of non-hazardous waste in the scope of Directive 2000/76/EC of the European Parliament and of the Council of 4 December 2000 on the incineration of waste	2.22984	41.4192	EDUARD MARISTANY	44	08930	Sant Adrià de Besòs	ES	0.16268	0.12948
2017	ES.CAED/008371000.FACILITY	SOCIEDAD ANONIMA DE INDUSTRIAS CELULOSA ARAGONESA	PLANTA VALORIZACIÓN ENERGÉTICA	5(b)	Installations for the incineration of non-hazardous waste in the scope of Directive 2000/76/EC of the European Parliament and of the Council of 4 December 2000 on the incineration of waste	-0.679137	41.5384	EL ESPARTAL, CTRA. CASTELLON KM 21	21	50730	BURGO DE EBRO (EL)	ES	0.10682	0.08502
2017	FR.CAED/10012.FACILITY	ECONOTRE	ECONOTRE	5(b)	Installations for the incineration of non-hazardous waste in the scope of Directive 2000/76/EC of the European Parliament and of the Council of 4 December 2000 on the incineration of waste	1.04766	49.4671	ZA des Turquès Route de Montauban		31660	BESSIERES	FR	0.08477	0.06747
2017	FR.CAED/10862.FACILITY	CALLERGIE	CVE DE NOYELLES SOUS LENS	5(b)	Installations for the incineration of non-hazardous waste in the scope of Directive 2000/76/EC of the European Parliament and of the Council of 4 December 2000 on the incineration of waste	2.85	50.42	RUE DU DOCTEUR SCHAFFNER		62221	NOYELLES-SOUS-LENS	FR	0.04998	0.03978
2017	FR.CAED/10883.FACILITY	CIDEME	UIOM DE SAINT SAULVE	5(b)	Installations for the incineration of non-hazardous waste in the scope of Directive 2000/76/EC of the European Parliament and of the Council of 4 December 2000 on the incineration of waste	4.76988	45.4028	ZI N° 4 Rue du Galibot		59880	SAINT-SAULVE	FR	0.049	0.039
2017	FR.CAED/11114.FACILITY	COVALYS	CVE ANTARES	5(b)	Installations for the incineration of non-hazardous waste in the scope of Directive 2000/76/EC of the European Parliament and of the Council of 4 December 2000 on the incineration of waste	3.128	50.764	RD 191, BP 302		59433	HALLUIN	FR	0.14945	0.11895
2017	FR.CAED/11255.FACILITY	BIOGIE	BIOGIE	5(b)	Installations for the incineration of non-hazardous waste in the scope of Directive 2000/76/EC of the European Parliament and of the Council of 4 December 2000 on the incineration of waste	2.3171	51.0034	Rue A.Carrel		59640	DUNKERQUE	FR	0.05243	0.04173
2017	FR.CAED/11545.FACILITY	COMMUNAUTÉ URBAINE DU GRAND POITIERS	UNITÉ DE VALORISATION ÉNERGÉTIQUE DE POITIERS	5(b)	Installations for the incineration of non-hazardous waste in the scope of Directive 2000/76/EC of the European Parliament and of the Council of 4 December 2000 on the incineration of waste	0.38937	46.5941	1 rue Edouard Branly		86000	POITIERS	FR	0.15729	0.12519
2017	FR.CAED/12507.FACILITY	VALORYELE	VALORYELE	5(b)	Installations for the incineration of non-hazardous waste in the scope of Directive 2000/76/EC of the European Parliament and of the Council of 4 December 2000 on the incineration of waste	0.55937	44.1858	Chemin Saint Mathurin		28150	OUARVILLE	FR	0.07056	0.05616
2017	FR.CAED/12665.FACILITY	ORVADE	ORVADE	5(b)	Installations for the incineration of non-hazardous waste in the scope of Directive 2000/76/EC of the European Parliament and of the Council of 4 December 2000 on the incineration of waste	2.86438	49.0911	651 rue de la Motte Pétrée		45770	SARAN	FR	0.05194	0.04134
2017	FR.CAED/13341.FACILITY	SITOM NORD ISERE	USINE D'INCINÉRATION DES ORDURES MÉNAGÈRES AU SITOM NORD ISÈRE	5(b)	Installations for the incineration of non-hazardous waste in the scope of Directive 2000/76/EC of the European Parliament and of the Council of 4 December 2000 on the incineration of waste	5.2573	45.5972	Rue des frères Lumière		38314	BOURGOIN-JALLIEU	FR	0.08281	0.06591
2017	FR.CAED/13703.FACILITY	CYDEL	CYDEL	5(b)	Installations for the incineration of non-hazardous waste in the scope of Directive 2000/76/EC of the European Parliament and of the Council of 4 December 2000 on the incineration of waste	5.4997	47.1127	Coume Dels Tres Pilous		66600	CALCE	FR	0.09506	0.07566
2017	FR.CAED/2190.FACILITY	SOTRAVAL-SPL	UNITÉ DE VALORISATION ENERGÉTIQUE DU SPERNOT	5(b)	Installations for the incineration of non-hazardous waste in the scope of Directive 2000/76/EC of the European Parliament and of the Council of 4 December 2000 on the incineration of waste	-4.50856	48.4128	Le Spernot -179 boulevard de l'Europe		29200	BREST	FR	0.05341	0.04251
2017	FR.CAED/2280.FACILITY	VALOREIZH	UVE DE RENNES	5(b)	Installations for the incineration of non-hazardous waste in the scope of Directive 2000/76/EC of the European Parliament and of the Council of 4 December 2000 on the incineration of waste	-1.7	48.13	Avenue Charles Tillon		35000	RENNES	FR	0.09212	0.07332
2017	FR.CAED/3176.FACILITY	VERNEA	VERNEA	5(b)	Installations for the incineration of non-hazardous waste in the scope of Directive 2000/76/EC of the European Parliament and of the Council of 4 December 2000 on the incineration of waste	3.15874	45.7657	1 CHEMIN DES DOMAINES DE BEAULIEU		63000	CLERMONT-FERRAND	FR	0.18767	0.14937
2017	FR.CAED/3899.FACILITY	SMEDAR	UNITÉ DE VALORISATION ENERGÉTIQUE VESTA	5(b)	Installations for the incineration of non-hazardous waste in the scope of Directive 2000/76/EC of the European Parliament and of the Council of 4 December 2000 on the incineration of waste	7.48824	47.6384	Boulevard de Stalingrad		76120	GRAND-QUEVILLY	FR	0.14651	0.11661
2017	FR.CAED/4111.FACILITY	OREADE	OREADE (EX-ECOSTU'AIR)	5(b)	Installations for the incineration of non-hazardous waste in the scope of Directive 2000/76/EC of the European Parliament and of the Council of 4 December 2000 on the incineration of waste	0.50569	49.5229	ZAC Port Jérôme 2		76170	SAINT-JEAN-DE-FOLLEVILLE	FR	0.08085	0.06435
2017	FR.CAED/437.FACILITY	ESIANE	ESIANE	5(b)	Installations for the incineration of non-hazardous waste in the scope of Directive 2000/76/EC of the European Parliament and of the Council of 4 December 2000 on the incineration of waste	2.50012	49.28	Avenue Frédéric et Irène JOLIOT CURIE		60870	VILLERS-SAINT-PAUL	FR	0.06713	0.05343
2017	FR.CAED/5004.FACILITY	SIDEFAGE	UIOM DE BELLEGARDE SUR VALSERINE	5(b)	Installations for the incineration of non-hazardous waste in the scope of Directive 2000/76/EC of the European Parliament and of the Council of 4 December 2000 on the incineration of waste	5.81475	46.0878	ZI d'Arlod 5 chemin du Tapey		01200	BELLEGARDE-SUR-VALSERINE	FR	0.04998	0.03978
2017	FR.CAED/5246.FACILITY	GRENOBLE-ALPES METROPOLE	USINE D'INCINÉRATION ATHANOR	5(b)	Installations for the incineration of non-hazardous waste in the scope of Directive 2000/76/EC of the European Parliament and of the Council of 4 December 2000 on the incineration of waste	5.75885	45.1979	Chemin de la Tuilerie		38700	TRONCHE	FR	0.08183	0.06513
2017	FR.CAED/5447.FACILITY	VALORLY	VALORLY	5(b)	Installations for the incineration of non-hazardous waste in the scope of Directive 2000/76/EC of the European Parliament and of the Council of 4 December 2000 on the incineration of waste	6.07587	44.9973	2870, Avenue de l'Europe		69140	RILLIEUX-LA-PAPE	FR	0.0588	0.0468
2017	FR.CAED/5469.FACILITY	METROPOLE DE LYON	UNITÉ DE TRAITEMENT DE DE VALORISATION ENERGÉTIQUE DES DÉCHETS URBAINS DE LYON SUD	5(b)	Installations for the incineration of non-hazardous waste in the scope of Directive 2000/76/EC of the European Parliament and of the Council of 4 December 2000 on the incineration of waste	4.837	45.724	Port Edouard Herriot 7, rue de dole		69007	LYON	FR	0.10927	0.08697
2017	FR.CAED/5491.FACILITY	SAVOIE DECHETS	USINE D'INCINÉRATION DE CHAMBÉRY	5(b)	Installations for the incineration of non-hazardous waste in the scope of Directive 2000/76/EC of the European Parliament and of the Council of 4 December 2000 on the incineration of waste	6.65696	45.5542	336 rue de Chantabord - CS22425		73024	CHAMBERY	FR	0.05978	0.04758
2017	FR.CAED/5921.FACILITY	VAL'ERGIE	VAL'ERGIE	5(b)	Installations for the incineration of non-hazardous waste in the scope of Directive 2000/76/EC of the European Parliament and of the Council of 4 December 2000 on the incineration of waste	3.74868	47.9851	226, rue Victor Grignard		54710	LUDRES	FR	0.049	0.039
2017	FR.CAED/659.FACILITY	ASTRIA	ASTRIA	5(b)	Installations for the incineration of non-hazardous waste in the scope of Directive 2000/76/EC of the European Parliament and of the Council of 4 December 2000 on the incineration of waste	1.42937	45.5268	Clos de Hilde Rue Louis Blériot		33323	BEGLES	FR	0.10437	0.08307
2017	FR.CAED/673.FACILITY	RIVE DROITE ENVIRONNEMENT	COMPLEXE THERMIQUE DES HAUTS DE GARONNE	5(b)	Installations for the incineration of non-hazardous waste in the scope of Directive 2000/76/EC of the European Parliament and of the Council of 4 December 2000 on the incineration of waste	1.41649	48.6082	U.V.E. DE CENON RUE JEAN COCTEAU		33150	CENON	FR	0.05194	0.04134
2017	FR.CAED/6753.FACILITY	SYNER'VAL	SYNER'VAL	5(b)	Installations for the incineration of non-hazardous waste in the scope of Directive 2000/76/EC of the European Parliament and of the Council of 4 December 2000 on the incineration of waste	0.168	47.981	Unité de Valorisation Énergétique des Déchets 200 bis rue de l'Angevinière		72027	MANS	FR	0.06909	0.05499
2017	FR.CAED/6792.FACILITY	ALCEA	ALCEA	5(b)	Installations for the incineration of non-hazardous waste in the scope of Directive 2000/76/EC of the European Parliament and of the Council of 4 December 2000 on the incineration of waste	-1.50555	47.2245	USINE D'INCINERATION D'ORDURES MENAGERES - 415 RUE DE L'ETIER		44319	NANTES	FR	0.05292	0.04212
2017	FR.CAED/7420.FACILITY	ZEPHIRE	ZEPHIRE	5(b)	Installations for the incineration of non-hazardous waste in the scope of Directive 2000/76/EC of the European Parliament and of the Council of 4 December 2000 on the incineration of waste	5.88936	43.1256	Chemin Gaétan Castaldo - Quartier de l'Escaillon		83200	TOULON	FR	0.12005	0.09555
2017	FR.CAED/7442.FACILITY	SONITHERM	SONITHERM	5(b)	Installations for the incineration of non-hazardous waste in the scope of Directive 2000/76/EC of the European Parliament and of the Council of 4 December 2000 on the incineration of waste	7.30194	43.7354	33, bvd de l'Ariane		06300	NICE	FR	0.12789	0.10179
2017	FR.CAED/7447.FACILITY	VALOMED	USINE D'INCINÉRATION D'ANTIBES	5(b)	Installations for the incineration of non-hazardous waste in the scope of Directive 2000/76/EC of the European Parliament and of the Council of 4 December 2000 on the incineration of waste	7.12096	43.5734	Unité de Valorisation Énergétique CS 50063		06600	ANTIBES	FR	0.06566	0.05226
2017	FR.CAED/7494.FACILITY	SUEZ RV ENERGIE	SUEZ RV ENERGIE	5(b)	Installations for the incineration of non-hazardous waste in the scope of Directive 2000/76/EC of the European Parliament and of the Council of 4 December 2000 on the incineration of waste	4.89285	43.9725	649 avenue Vidier		84270	VEDENE	FR	0.08624	0.06864
2017	FR.CAED/7945.FACILITY	EVERE	EVERE	5(b)	Installations for the incineration of non-hazardous waste in the scope of Directive 2000/76/EC of the European Parliament and of the Council of 4 December 2000 on the incineration of waste	-3.07866	47.8686	Parcelle 60 - Caban Sud		13270	FOS-SUR-MER	FR	0.18914	0.15054
2017	FR.CAED/8201.FACILITY	SOMOVAL - (VEOLIA RECYCLAGE ET VALORISATION)	SOMOVAL	5(b)	Installations for the incineration of non-hazardous waste in the scope of Directive 2000/76/EC of the European Parliament and of the Council of 4 December 2000 on the incineration of waste	2.8305	49.0052	LA CROIX GILLET		77122	MONTHYON	FR	0.05537	0.04407
2017	FR.CAED/8246.FACILITY	GÉNÉRIS	CIT DE VAUX LE PÉNIL	5(b)	Installations for the incineration of non-hazardous waste in the scope of Directive 2000/76/EC of the European Parliament and of the Council of 4 December 2000 on the incineration of waste	2.6898	48.5414	Rue du Tertre de Chérisy		77000	VAUX-LE-PENIL	FR	0.05047	0.04017
2017	FR.CAED/8261.FACILITY	NOVERGIE IDF (AZALYS)	AZALYS	5(b)	Installations for the incineration of non-hazardous waste in the scope of Directive 2000/76/EC of the European Parliament and of the Council of 4 December 2000 on the incineration of waste	2.03745	48.9477	CTVD AZALYS RD 190		78955	CARRIERES-SOUS-POISSY	FR	0.0637	0.0507
2017	FR.CAED/8322.FACILITY	CNIM TG	CVD THIVERVAL-GRIGNON	5(b)	Installations for the incineration of non-hazardous waste in the scope of Directive 2000/76/EC of the European Parliament and of the Council of 4 December 2000 on the incineration of waste	1.92938	48.8396	Route des Nourrices		78850	THIVERVAL-GRIGNON	FR	0.07644	0.06084
2017	FR.CAED/8363.FACILITY	ENORIS	ENORIS (LB)	5(b)	Installations for the incineration of non-hazardous waste in the scope of Directive 2000/76/EC of the European Parliament and of the Council of 4 December 2000 on the incineration of waste	2.276	48.717	ZI de la bonde Route de la bonde		91300	MASSY	FR	0.05439	0.04329
2017	FR.CAED/8386.FACILITY	SEMARIV	SEMARIV- CITD	5(b)	Installations for the incineration of non-hazardous waste in the scope of Directive 2000/76/EC of the European Parliament and of the Council of 4 December 2000 on the incineration of waste	2.35923	48.5709	CITD -ECOSITE de Vert le Grand		91810	VERT-LE-GRAND	FR	0.08624	0.06864
2017	FR.CAED/8452.FACILITY	CGECP AUROR'ENVIRONNEMENT	AUROR'ENVIRONNEMENT	5(b)	Installations for the incineration of non-hazardous waste in the scope of Directive 2000/76/EC of the European Parliament and of the Council of 4 December 2000 on the incineration of waste	2.07128	49.034	25 avenue du Fief Parc d'activités des Béthunes CS99111 SAINT-OUEN L'AUMONE		95073	CERGY	FR	0.06321	0.05031
2017	FR.CAED/8463.FACILITY	SAREN	SAREN	5(b)	Installations for the incineration of non-hazardous waste in the scope of Directive 2000/76/EC of the European Parliament and of the Council of 4 December 2000 on the incineration of waste	2.38725	48.9989	1, RUE DES TISSONVILLIERS		95200	SARCELLES	FR	0.06468	0.05148
2017	FR.CAED/8527.FACILITY	DALKIA WASTENERGY	DALKIA WASTENERGY	5(b)	Installations for the incineration of non-hazardous waste in the scope of Directive 2000/76/EC of the European Parliament and of the Council of 4 December 2000 on the incineration of waste	2.32326	48.9146	22, rue Ardoin		93584	SAINT-OUEN	FR	0.22785	0.18135
2017	FR.CAED/8549.FACILITY	IVRY PARIS XIII	IVRY PARIS XIII	5(b)	Installations for the incineration of non-hazardous waste in the scope of Directive 2000/76/EC of the European Parliament and of the Council of 4 December 2000 on the incineration of waste	7.37318	48.0845	43, rue Bruneseau		75013	PARIS	FR	0.29547	0.23517
2017	FR.CAED/9077.FACILITY	OCREAL	OCREAL	5(b)	Installations for the incineration of non-hazardous waste in the scope of Directive 2000/76/EC of the European Parliament and of the Council of 4 December 2000 on the incineration of waste	1.59647	50.7221	"lieu dit "Les Roussels" RN 113"		34400	LUNEL-VIEL	FR	0.04949	0.03939
2017	FR.CAED/9662.FACILITY	SIVOM DE L'AGGLOMERATION MULHOUSIENNE	UIRU DE SAUSHEIM	5(b)	Installations for the incineration of non-hazardous waste in the scope of Directive 2000/76/EC of the European Parliament and of the Council of 4 December 2000 on the incineration of waste	7.4	47.7	1, route de Chalampe		68390	SAUSHEIM	FR	0.0539	0.0429
2017	FR.CAED/9964.FACILITY	SETMI	SETMI	5(b)	Installations for the incineration of non-hazardous waste in the scope of Directive 2000/76/EC of the European Parliament and of the Council of 4 December 2000 on the incineration of waste	1.32241	45.0965	BP 33724 11 chemin de Perpignan		31037	TOULOUSE	FR	0.11956	0.09516
2017	http://paikkatiedot.fi/so/1002031/pf/ProductionFacility/0100215001.ProductionFacility	Vantaan Energia Oy	Vantaan Energia Oy, Jätevoimala	5(b)	Installations for the incineration of non-hazardous waste in the scope of Directive 2000/76/EC of the European Parliament and of the Council of 4 December 2000 on the incineration of waste	25.1294	60.2605	Långmosseninkuja	1	01200	Vantaa	FI	0.08526	0.06786
2017	https://data.ied_registry.omgeving.vlaanderen.be/id/productionfacility/BE.VL.000000021.FACILITY	INTERCOMMUNALE VOOR SLIB- EN VUILVERWIJDERING VAN ANTWERPSE GEMEENTEN	ISVAG INTERCOMMUNALE	5(b)	Installations for the incineration of non-hazardous waste in the scope of Directive 2000/76/EC of the European Parliament and of the Council of 4 December 2000 on the incineration of waste	4.3771	51.1467	Boomsesteenweg	1000	2610	Antwerpen	BE	0.08232	0.06552
2017	https://data.ied_registry.omgeving.vlaanderen.be/id/productionfacility/BE.VL.000000664.FACILITY	INTERGEMEENTELIJKE VERENIGING VOOR AFVALBEHEER IN GENT EN OMSTREKEN	IVAGO - SITE PROEFTUINSTRAAT	5(b)	Installations for the incineration of non-hazardous waste in the scope of Directive 2000/76/EC of the European Parliament and of the Council of 4 December 2000 on the incineration of waste	3.7415	51.0208	Proeftuinstraat	43	9000	Gent	BE	0.05145	0.04095
2017	https://data.ied_registry.omgeving.vlaanderen.be/id/productionfacility/BE.VL.000000665.FACILITY	INTERGEMEENTELIJKE OPDRACHTHOUDENDE VERENIGING VOOR HUISVUILVERWERKING MEETJESLAND	INTERGEMEENTELIJKE OPDRACHTHOUDENDE VERENIGING VOOR HUISVUILVERWERKING MEETJESLAND	5(b)	Installations for the incineration of non-hazardous waste in the scope of Directive 2000/76/EC of the European Parliament and of the Council of 4 December 2000 on the incineration of waste	3.5171	51.212	Sint-Laureinsesteenweg	29	9900	Eeklo	BE	0.05684	0.04524
2017	https://data.ied_registry.omgeving.vlaanderen.be/id/productionfacility/BE.VL.000000931.FACILITY	A&S ENERGIE	A & S ENERGIE	5(b)	Installations for the incineration of non-hazardous waste in the scope of Directive 2000/76/EC of the European Parliament and of the Council of 4 December 2000 on the incineration of waste	3.3063	50.911	Nieuwenhovestraat	5	8780	Oostrozebeke	BE	0.13475	0.10725
2017	https://data.ied_registry.omgeving.vlaanderen.be/id/productionfacility/BE.VL.000000991.FACILITY	BIOSTOOM OOSTENDE	BIOSTOOM OOSTENDE	5(b)	Installations for the incineration of non-hazardous waste in the scope of Directive 2000/76/EC of the European Parliament and of the Council of 4 December 2000 on the incineration of waste	2.9953	51.2101	Solvaylaan	7	8400	Oostende	BE	0.11319	0.09009
2017	https://registry.gdi-de.org/id/de.bb.inspire.pf.eureg/16018080	EEW Energy from Waste Premnitz GmbH	EEW Energy from Waste Premnitz GmbH	5(b)	Installations for the incineration of non-hazardous waste in the scope of Directive 2000/76/EC of the European Parliament and of the Council of 4 December 2000 on the incineration of waste	12.359	52.5277	Dr.-Herbert-Rein-Str.	1	14727	Premnitz	DE	0.07301	0.05811
2017	https://registry.gdi-de.org/id/de.bb.inspire.pf.eureg/23021047	IKW Rüdersdorf GmbH	IKW Rüdersdorf GmbH	5(b)	Installations for the incineration of non-hazardous waste in the scope of Directive 2000/76/EC of the European Parliament and of the Council of 4 December 2000 on the incineration of waste	13.8308	52.4907	Siedlerweg	11	15562	Rüdersdorf	DE	0.13916	0.11076
2017	https://registry.gdi-de.org/id/de.bb.inspire.pf.eureg/23040177	Propower GmbH	Propower GmbH	5(b)	Installations for the incineration of non-hazardous waste in the scope of Directive 2000/76/EC of the European Parliament and of the Council of 4 December 2000 on the incineration of waste	14.6405	52.1726	Oderlandstraße	109	15890	Eisenhüttenstadt	DE	0.16856	0.13416
2017	https://registry.gdi-de.org/id/de.bb.inspire.pf.eureg/45035910	EEW Energy from Waste Großräschen GmbH	EEW Energy from Waste Großräschen GmbH	5(b)	Installations for the incineration of non-hazardous waste in the scope of Directive 2000/76/EC of the European Parliament and of the Council of 4 December 2000 on the incineration of waste	13.9774	51.582	Bergmannstraße	29	01983	Großräschen	DE	0.12446	0.09906
2017	https://registry.gdi-de.org/id/de.bb.inspire.pf.eureg/45035910	EEW Energy from Waste Großräschen GmbH	EEW Energy from Waste Großräschen GmbH	5(b)	Installations for the incineration of non-hazardous waste in the scope of Directive 2000/76/EC of the European Parliament and of the Council of 4 December 2000 on the incineration of waste	13.9774	51.582	Bergmannstraße	29	01983	Großräschen	DE	0.06811	0.05421
2017	https://registry.gdi-de.org/id/de.be.pf.lisa/760	BSR Berliner Stadtreinigungsbetriebe	BSR / MHKW	5(b)	Installations for the incineration of non-hazardous waste in the scope of Directive 2000/76/EC of the European Parliament and of the Council of 4 December 2000 on the incineration of waste	13.2379	52.529	Freiheit	24 - 25	13597	Berlin	DE	0.10927	0.08697
2017	https://registry.gdi-de.org/id/de.be.pf.lisa/760	BSR Berliner Stadtreinigungsbetriebe	BSR / MHKW	5(b)	Installations for the incineration of non-hazardous waste in the scope of Directive 2000/76/EC of the European Parliament and of the Council of 4 December 2000 on the incineration of waste	13.2379	52.529	Freiheit	24 - 25	13597	Berlin	DE	0.21952	0.17472
2017	https://registry.gdi-de.org/id/de.bw.lubw.inspire.pf/pf-450-1195689-00000000	EnBW Kraftwerke AG	EnBW HKW Stuttgart-Münster (mit MVA)	5(b)	Installations for the incineration of non-hazardous waste in the scope of Directive 2000/76/EC of the European Parliament and of the Council of 4 December 2000 on the incineration of waste	9.21983	48.8143	Voltastraße	45	70376	Stuttgart	DE	0.13475	0.10725
2017	https://registry.gdi-de.org/id/de.bw.lubw.inspire.pf/pf-450-1195689-00000000	EnBW Kraftwerke AG	EnBW HKW Stuttgart-Münster (mit MVA)	5(b)	Installations for the incineration of non-hazardous waste in the scope of Directive 2000/76/EC of the European Parliament and of the Council of 4 December 2000 on the incineration of waste	9.21983	48.8143	Voltastraße	45	70376	Stuttgart	DE	0.23569	0.18759
2017	https://registry.gdi-de.org/id/de.bw.lubw.inspire.pf/pf-450-34033281-00000000	EEW Energy from Waste Saarbrücken GmbH	EEW Energy from Waste Saarbrücken GmbH TREA Breisgau	5(b)	Installations for the incineration of non-hazardous waste in the scope of Directive 2000/76/EC of the European Parliament and of the Council of 4 December 2000 on the incineration of waste	7.61644	47.8902	Heitersheimer Straße	2	79427	Eschbach	DE	0.04165	0.03315
2017	https://registry.gdi-de.org/id/de.bw.lubw.inspire.pf/pf-450-34033281-00000000	EEW Energy from Waste Saarbrücken GmbH	EEW Energy from Waste Saarbrücken GmbH TREA Breisgau	5(b)	Installations for the incineration of non-hazardous waste in the scope of Directive 2000/76/EC of the European Parliament and of the Council of 4 December 2000 on the incineration of waste	7.61644	47.8902	Heitersheimer Straße	2	79427	Eschbach	DE	0.0833	0.0663
2017	https://registry.gdi-de.org/id/de.bw.lubw.inspire.pf/pf-450-7024258-00000000	EEW Energy from Waste Göppinge	EEW MHKW Göppingen	5(b)	Installations for the incineration of non-hazardous waste in the scope of Directive 2000/76/EC of the European Parliament and of the Council of 4 December 2000 on the incineration of waste	9.67148	48.6821	Iltishofweg	40	73037	Göppingen	DE	0.037828	0.030108
2017	https://registry.gdi-de.org/id/de.bw.lubw.inspire.pf/pf-450-7024258-00000000	EEW Energy from Waste Göppinge	EEW MHKW Göppingen	5(b)	Installations for the incineration of non-hazardous waste in the scope of Directive 2000/76/EC of the European Parliament and of the Council of 4 December 2000 on the incineration of waste	9.67148	48.6821	Iltishofweg	40	73037	Göppingen	DE	0.07546	0.06006
2017	https://registry.gdi-de.org/id/de.bw.lubw.inspire.pf/pf-450-9169156-00000000	MVV Umwelt Asset GmbH	MVV Umwelt Asset GmbH - MHKW Mannheim	5(b)	Installations for the incineration of non-hazardous waste in the scope of Directive 2000/76/EC of the European Parliament and of the Council of 4 December 2000 on the incineration of waste	8.45245	49.5214	Otto-Hahn-Str.	1	68169	Mannheim	DE	0.17346	0.13806
2017	https://registry.gdi-de.org/id/de.bw.lubw.inspire.pf/pf-450-9169156-00000000	MVV Umwelt Asset GmbH	MVV Umwelt Asset GmbH - MHKW Mannheim	5(b)	Installations for the incineration of non-hazardous waste in the scope of Directive 2000/76/EC of the European Parliament and of the Council of 4 December 2000 on the incineration of waste	8.45245	49.5214	Otto-Hahn-Str.	1	68169	Mannheim	DE	0.31017	0.24687
2017	https://registry.gdi-de.org/id/de.by.inspire.pf.ied/S00018	Heizkraftwerk Altenstadt GmbH & Co. KG	Heizkraftwerk Altenstadt GmbH & Co. KG	5(b)	Installations for the incineration of non-hazardous waste in the scope of Directive 2000/76/EC of the European Parliament and of the Council of 4 December 2000 on the incineration of waste	10.8592	47.7975	Triebstr.	90	86972	Altenstadt	DE	0.0539	0.0429
2017	https://registry.gdi-de.org/id/de.by.inspire.pf.ied/S00052	Zweckverband Abfallverwertung Südostbayern	Müllheizkraftwerk Burgkirchen	5(b)	Installations for the incineration of non-hazardous waste in the scope of Directive 2000/76/EC of the European Parliament and of the Council of 4 December 2000 on the incineration of waste	12.7347	48.1851	Bruck	110	84508	Burgkirchen a.d.Alz	DE	0.11123	0.08853
2017	https://registry.gdi-de.org/id/de.by.inspire.pf.ied/S00052	Zweckverband Abfallverwertung Südostbayern	Müllheizkraftwerk Burgkirchen	5(b)	Installations for the incineration of non-hazardous waste in the scope of Directive 2000/76/EC of the European Parliament and of the Council of 4 December 2000 on the incineration of waste	12.7347	48.1851	Bruck	110	84508	Burgkirchen a.d.Alz	DE	0.05243	0.04173
2017	https://registry.gdi-de.org/id/de.by.inspire.pf.ied/S00053	Zweckverband Müllverwertungsanlage Ingolstadt	Müllverwertungsanlage Ingolstadt	5(b)	Installations for the incineration of non-hazardous waste in the scope of Directive 2000/76/EC of the European Parliament and of the Council of 4 December 2000 on the incineration of waste	11.493	48.7643	Am Mailinger Bach	141	85055	Ingolstadt	DE	0.11123	0.08853
2017	https://registry.gdi-de.org/id/de.by.inspire.pf.ied/S00053	Zweckverband Müllverwertungsanlage Ingolstadt	Müllverwertungsanlage Ingolstadt	5(b)	Installations for the incineration of non-hazardous waste in the scope of Directive 2000/76/EC of the European Parliament and of the Council of 4 December 2000 on the incineration of waste	11.493	48.7643	Am Mailinger Bach	141	85055	Ingolstadt	DE	0.04459	0.03549
2017	https://registry.gdi-de.org/id/de.by.inspire.pf.ied/S00499	Zweckverband Müllverwertung Schwandorf	Müllkraftwerk Schwandorf	5(b)	Installations for the incineration of non-hazardous waste in the scope of Directive 2000/76/EC of the European Parliament and of the Council of 4 December 2000 on the incineration of waste	12.0879	49.31	Alustr.	7	92421	Schwandorf	DE	0.11123	0.08853
2017	https://registry.gdi-de.org/id/de.by.inspire.pf.ied/S00499	Zweckverband Müllverwertung Schwandorf	Müllkraftwerk Schwandorf	5(b)	Installations for the incineration of non-hazardous waste in the scope of Directive 2000/76/EC of the European Parliament and of the Council of 4 December 2000 on the incineration of waste	12.0879	49.31	Alustr.	7	92421	Schwandorf	DE	0.27734	0.22074
2017	https://registry.gdi-de.org/id/de.by.inspire.pf.ied/S00637	Zweckverband für Abfallwirtschaft in Nordwest-Oberfranken	MHKW Coburg	5(b)	Installations for the incineration of non-hazardous waste in the scope of Directive 2000/76/EC of the European Parliament and of the Council of 4 December 2000 on the incineration of waste	10.9549	50.2853	Glender Str.	30	96450	Coburg	DE	0.05782	0.04602
2017	https://registry.gdi-de.org/id/de.by.inspire.pf.ied/S00637	Zweckverband für Abfallwirtschaft in Nordwest-Oberfranken	MHKW Coburg	5(b)	Installations for the incineration of non-hazardous waste in the scope of Directive 2000/76/EC of the European Parliament and of the Council of 4 December 2000 on the incineration of waste	10.9549	50.2853	Glender Str.	30	96450	Coburg	DE	0.023079	0.018369
2017	https://registry.gdi-de.org/id/de.by.inspire.pf.ied/S00706	Abfallwirtschaftsbetrieb Stadt Nürnberg	Müllverbrennungsanlage Nürnberg	5(b)	Installations for the incineration of non-hazardous waste in the scope of Directive 2000/76/EC of the European Parliament and of the Council of 4 December 2000 on the incineration of waste	11.0555	49.4355	Hintere Marktstr.	4	90441	Nürnberg	DE	0.11466	0.09126
2017	https://registry.gdi-de.org/id/de.by.inspire.pf.ied/S00706	Abfallwirtschaftsbetrieb Stadt Nürnberg	Müllverbrennungsanlage Nürnberg	5(b)	Installations for the incineration of non-hazardous waste in the scope of Directive 2000/76/EC of the European Parliament and of the Council of 4 December 2000 on the incineration of waste	11.0555	49.4355	Hintere Marktstr.	4	90441	Nürnberg	DE	0.045864	0.036504
2017	https://registry.gdi-de.org/id/de.by.inspire.pf.ied/S00857	Zweckverband Abfallwirtschaft Raum Würzburg	Müllheizkraftwerk Würzburg	5(b)	Installations for the incineration of non-hazardous waste in the scope of Directive 2000/76/EC of the European Parliament and of the Council of 4 December 2000 on the incineration of waste	9.9946	49.7927	Gattingerstr.	31	97076	Würzburg	DE	0.09114	0.07254
2017	https://registry.gdi-de.org/id/de.by.inspire.pf.ied/S00857	Zweckverband Abfallwirtschaft Raum Würzburg	Müllheizkraftwerk Würzburg	5(b)	Installations for the incineration of non-hazardous waste in the scope of Directive 2000/76/EC of the European Parliament and of the Council of 4 December 2000 on the incineration of waste	9.9946	49.7927	Gattingerstr.	31	97076	Würzburg	DE	0.043806	0.034866
2017	https://registry.gdi-de.org/id/de.by.inspire.pf.ied/S00971	AVA Abfallverwertung Augsburg GmbH	AVA Abfallverwertung Augsburg GmbH	5(b)	Installations for the incineration of non-hazardous waste in the scope of Directive 2000/76/EC of the European Parliament and of the Council of 4 December 2000 on the incineration of waste	10.9332	48.4021	Am Mittleren Moos	60	86167	Augsburg	DE	0.045423	0.036153
2017	https://registry.gdi-de.org/id/de.by.inspire.pf.ied/S00971	AVA Abfallverwertung Augsburg GmbH	AVA Abfallverwertung Augsburg GmbH	5(b)	Installations for the incineration of non-hazardous waste in the scope of Directive 2000/76/EC of the European Parliament and of the Council of 4 December 2000 on the incineration of waste	10.9332	48.4021	Am Mittleren Moos	60	86167	Augsburg	DE	0.11368	0.09048
2017	https://registry.gdi-de.org/id/de.by.inspire.pf.ied/S00984	ZAK Energie GmbH	Müllheizkraftwerk Kempten	5(b)	Installations for the incineration of non-hazardous waste in the scope of Directive 2000/76/EC of the European Parliament and of the Council of 4 December 2000 on the incineration of waste	10.3191	47.7588	Dieselstr.	20	87437	Kempten (Allgäu)	DE	0.022736	0.018096
2017	https://registry.gdi-de.org/id/de.by.inspire.pf.ied/S00984	ZAK Energie GmbH	Müllheizkraftwerk Kempten	5(b)	Installations for the incineration of non-hazardous waste in the scope of Directive 2000/76/EC of the European Parliament and of the Council of 4 December 2000 on the incineration of waste	10.3191	47.7588	Dieselstr.	20	87437	Kempten (Allgäu)	DE	0.0686	0.0546
2017	https://registry.gdi-de.org/id/de.he.0945.DE7.pf.EU_Industrie/20000115	ENTEGA AG	ENTEGA AG (MHKW)	5(b)	Installations for the incineration of non-hazardous waste in the scope of Directive 2000/76/EC of the European Parliament and of the Council of 4 December 2000 on the incineration of waste	8.64631	49.8841	Otto-Röhm-Straße	19-25	64293	Darmstadt, Stadt	DE	0.09261	0.07371
2017	https://registry.gdi-de.org/id/de.he.0945.DE7.pf.EU_Industrie/30000112	MHKW GmbH	MHKW/HKW Nordweststadt	5(b)	Installations for the incineration of non-hazardous waste in the scope of Directive 2000/76/EC of the European Parliament and of the Council of 4 December 2000 on the incineration of waste	8.63537	50.1615	Heddernheimer Landstrasse	157	60439	Frankfurt am Main, St.	DE	0.20825	0.16575
2017	https://registry.gdi-de.org/id/de.he.0945.DE7.pf.EU_Industrie/30000112	MHKW GmbH	MHKW/HKW Nordweststadt	5(b)	Installations for the incineration of non-hazardous waste in the scope of Directive 2000/76/EC of the European Parliament and of the Council of 4 December 2000 on the incineration of waste	8.63537	50.1615	Heddernheimer Landstrasse	157	60439	Frankfurt am Main, St.	DE	0.10731	0.08541
2017	https://registry.gdi-de.org/id/de.he.0945.DE7.pf.EU_Industrie/30001503	Thermal Conversion Compound Industriepark Höchst GmbH	Thermal Conversion Compound Industriepark Höchst GmbH	5(b)	Installations for the incineration of non-hazardous waste in the scope of Directive 2000/76/EC of the European Parliament and of the Council of 4 December 2000 on the incineration of waste	8.53683	50.0884	Industriepark Höchst	-	65926	Frankfurt am Main, St.	DE	0.29057	0.23127
2017	https://registry.gdi-de.org/id/de.he.0945.DE7.pf.EU_Industrie/50003355	EEW Energy from Waste Heringen GmbH	ETN Wintershall	5(b)	Installations for the incineration of non-hazardous waste in the scope of Directive 2000/76/EC of the European Parliament and of the Council of 4 December 2000 on the incineration of waste	9.99811	50.8933	In der Aue	3	36266	Heringen (Werra)	DE	0.1421	0.1131
2017	https://registry.gdi-de.org/id/de.he.0945.DE7.pf.EU_Industrie/50006414	B+T Energie GmbH	B+T Energie GmbH	5(b)	Installations for the incineration of non-hazardous waste in the scope of Directive 2000/76/EC of the European Parliament and of the Council of 4 December 2000 on the incineration of waste	9.8492	51.3181	Kasseler Landstraße	21/23	37218	Witzenhausen	DE	0.08281	0.06591
2017	https://registry.gdi-de.org/id/de.he.0945.DE7.pf.EU_Industrie/50006414	B+T Energie GmbH	B+T Energie GmbH	5(b)	Installations for the incineration of non-hazardous waste in the scope of Directive 2000/76/EC of the European Parliament and of the Council of 4 December 2000 on the incineration of waste	9.8492	51.3181	Kasseler Landstraße	21/23	37218	Witzenhausen	DE	0.16513	0.13143
2017	https://registry.gdi-de.org/id/de.hh/pf.bube-eureg_/12562	VERA Klärschlammverbrennung GmbH	VERA Klärschlammverbrennung GmbH	5(b)	Installations for the incineration of non-hazardous waste in the scope of Directive 2000/76/EC of the European Parliament and of the Council of 4 December 2000 on the incineration of waste	9.94293	53.5345	Köhlbranddeich	3	20457	Hamburg	DE	0.08428	0.06708
2017	https://registry.gdi-de.org/id/de.hh/pf.bube-eureg_/6856	Vattenfall Europe New Energy GmbH Rugenberger Damm GmbH & Co. KG	MVR Müllverwertung Rugenberger Damm GmbH & Co. KG	5(b)	Installations for the incineration of non-hazardous waste in the scope of Directive 2000/76/EC of the European Parliament and of the Council of 4 December 2000 on the incineration of waste	9.93473	53.5212	Rugenberger Damm	1	21129	Hamburg	DE	0.15729	0.12519
2017	https://registry.gdi-de.org/id/de.hh/pf.bube-eureg_/6856	Vattenfall Europe New Energy GmbH Rugenberger Damm GmbH & Co. KG	MVR Müllverwertung Rugenberger Damm GmbH & Co. KG	5(b)	Installations for the incineration of non-hazardous waste in the scope of Directive 2000/76/EC of the European Parliament and of the Council of 4 December 2000 on the incineration of waste	9.93473	53.5212	Rugenberger Damm	1	21129	Hamburg	DE	0.08085	0.06435
2017	https://registry.gdi-de.org/id/de.hh/pf.bube-eureg_/8159	Müllverwertung Borsigstraße GmbH, (MVB)	Müllverwertung Borsigstraße GmbH, (MVB)	5(b)	Installations for the incineration of non-hazardous waste in the scope of Directive 2000/76/EC of the European Parliament and of the Council of 4 December 2000 on the incineration of waste	10.074	53.5314	Borsigstraße	6	22113	Hamburg	DE	0.07595	0.06045
2017	https://registry.gdi-de.org/id/de.hh/pf.bube-eureg_/8159	Müllverwertung Borsigstraße GmbH, (MVB)	Müllverwertung Borsigstraße GmbH, (MVB)	5(b)	Installations for the incineration of non-hazardous waste in the scope of Directive 2000/76/EC of the European Parliament and of the Council of 4 December 2000 on the incineration of waste	10.074	53.5314	Borsigstraße	6	22113	Hamburg	DE	0.23912	0.19032
2017	https://registry.gdi-de.org/id/de.ni.mu/01000259750	EEW Energy from Waste Helmstedt GmbH	EEW Energy from Waste Helmstedt GmbH	5(b)	Installations for the incineration of non-hazardous waste in the scope of Directive 2000/76/EC of the European Parliament and of the Council of 4 December 2000 on the incineration of waste	10.9778	52.1701	B	244	38364	Schöningen	DE	0.23814	0.18954
2017	https://registry.gdi-de.org/id/de.ni.mu/04000025140	Klingele Papierwerke GmbH & Co. KG Papierfabrik Weener	Klingele Papierwerke GmbH & Co. KG Papierfabrik Weener	5(b)	Installations for the incineration of non-hazardous waste in the scope of Directive 2000/76/EC of the European Parliament and of the Council of 4 December 2000 on the incineration of waste	7.35639	53.1807	Industriestr.	46	26826	Weener	DE	0.10829	0.08619
2017	https://registry.gdi-de.org/id/de.ni.mu/06060181710	EEW Energy from Waste Hannover GmbH	EEW Energy from Waste Hannover GmbH	5(b)	Installations for the incineration of non-hazardous waste in the scope of Directive 2000/76/EC of the European Parliament and of the Council of 4 December 2000 on the incineration of waste	9.85318	52.4118	Moorwaldweg	310	30659	Hannover	DE	0.13524	0.10764
2017	https://registry.gdi-de.org/id/de.ni.mu/07070168330	Enertec Hameln GmbH	Enertec Hameln GmbH	5(b)	Installations for the incineration of non-hazardous waste in the scope of Directive 2000/76/EC of the European Parliament and of the Council of 4 December 2000 on the incineration of waste	9.3884	52.0989	Heinrich-Schoormann-Weg	1	31789	Hameln	DE	0.07154	0.05694
2017	https://registry.gdi-de.org/id/de.ni.mu/07070168330	Enertec Hameln GmbH	Enertec Hameln GmbH	5(b)	Installations for the incineration of non-hazardous waste in the scope of Directive 2000/76/EC of the European Parliament and of the Council of 4 December 2000 on the incineration of waste	9.3884	52.0989	Heinrich-Schoormann-Weg	1	31789	Hameln	DE	0.21266	0.16926
2017	https://registry.gdi-de.org/id/de.ni.mu/10000167470	EVI Abfallverwertung B.V. & Co. KG	EVI Abfallverwertung B.V. & Co. KG	5(b)	Installations for the incineration of non-hazardous waste in the scope of Directive 2000/76/EC of the European Parliament and of the Council of 4 December 2000 on the incineration of waste	6.74319	52.6436	Vosmatenweg	6	49824	Laar	DE	0.09359	0.07449
2017	https://registry.gdi-de.org/id/de.ni.mu/10000167470	EVI Abfallverwertung B.V. & Co. KG	EVI Abfallverwertung B.V. & Co. KG	5(b)	Installations for the incineration of non-hazardous waste in the scope of Directive 2000/76/EC of the European Parliament and of the Council of 4 December 2000 on the incineration of waste	6.74319	52.6436	Vosmatenweg	6	49824	Laar	DE	0.18767	0.14937
2017	https://registry.gdi-de.org/id/de.nw.inspire.pf.bube-eureg/arb-2017-111000-100-0407176	Netzgesellschaft Düsseldorf mbH	Stadtwerke Düsseldorf AG	5(b)	Installations for the incineration of non-hazardous waste in the scope of Directive 2000/76/EC of the European Parliament and of the Council of 4 December 2000 on the incineration of waste	6.823	51.2257	Flinger Broich	25	40235	Düsseldorf	DE	0.11172	0.08892
2017	https://registry.gdi-de.org/id/de.nw.inspire.pf.bube-eureg/arb-2017-111000-100-0407176	Netzgesellschaft Düsseldorf mbH	Stadtwerke Düsseldorf AG	5(b)	Installations for the incineration of non-hazardous waste in the scope of Directive 2000/76/EC of the European Parliament and of the Council of 4 December 2000 on the incineration of waste	6.823	51.2257	Flinger Broich	25	40235	Düsseldorf	DE	0.22785	0.18135
2017	https://registry.gdi-de.org/id/de.nw.inspire.pf.bube-eureg/arb-2017-113000-100-0204710	RWE Generation SE Region West	RWE Generation SE MHKW Karnap	5(b)	Installations for the incineration of non-hazardous waste in the scope of Directive 2000/76/EC of the European Parliament and of the Council of 4 December 2000 on the incineration of waste	7.00026	51.5154	Arenbergstr.	45	45329	Essen	DE	0.33222	0.26442
2017	https://registry.gdi-de.org/id/de.nw.inspire.pf.bube-eureg/arb-2017-113000-100-0204710	RWE Generation SE Region West	RWE Generation SE MHKW Karnap	5(b)	Installations for the incineration of non-hazardous waste in the scope of Directive 2000/76/EC of the European Parliament and of the Council of 4 December 2000 on the incineration of waste	7.00026	51.5154	Arenbergstr.	45	45329	Essen	DE	0.17003	0.13533
2017	https://registry.gdi-de.org/id/de.nw.inspire.pf.bube-eureg/arb-2017-119000-100-0431192	GMVA Gemeinschafts-Müllverbrennungsanlage Niederrhein GmbH	GMVA Gemeinschafts-Müllverbrennungsanlage Niederrhein GmbH	5(b)	Installations for the incineration of non-hazardous waste in the scope of Directive 2000/76/EC of the European Parliament and of the Council of 4 December 2000 on the incineration of waste	6.83334	51.4844	Buschhausener Str.	156	46049	Oberhausen	DE	0.3479	0.2769
2017	https://registry.gdi-de.org/id/de.nw.inspire.pf.bube-eureg/arb-2017-119000-100-0431192	GMVA Gemeinschafts-Müllverbrennungsanlage Niederrhein GmbH	GMVA Gemeinschafts-Müllverbrennungsanlage Niederrhein GmbH	5(b)	Installations for the incineration of non-hazardous waste in the scope of Directive 2000/76/EC of the European Parliament and of the Council of 4 December 2000 on the incineration of waste	6.83334	51.4844	Buschhausener Str.	156	46049	Oberhausen	DE	0.17493	0.13923
2017	https://registry.gdi-de.org/id/de.nw.inspire.pf.bube-eureg/arb-2017-124000-100-0113340	AWG Abfallwirtschaftsgesellschaft mbH Wuppertal	AWG Abfallwirtschaftsgesellschaft mbH Wuppertal	5(b)	Installations for the incineration of non-hazardous waste in the scope of Directive 2000/76/EC of the European Parliament and of the Council of 4 December 2000 on the incineration of waste	7.14281	51.2253	Korzert	15	42349	Wuppertal	DE	0.08379	0.06669
2017	https://registry.gdi-de.org/id/de.nw.inspire.pf.bube-eureg/arb-2017-124000-100-0113340	AWG Abfallwirtschaftsgesellschaft mbH Wuppertal	AWG Abfallwirtschaftsgesellschaft mbH Wuppertal	5(b)	Installations for the incineration of non-hazardous waste in the scope of Directive 2000/76/EC of the European Parliament and of the Council of 4 December 2000 on the incineration of waste	7.14281	51.2253	Korzert	15	42349	Wuppertal	DE	0.19943	0.15873
2017	https://registry.gdi-de.org/id/de.nw.inspire.pf.bube-eureg/arb-2017-170020-100-0501870	Kreis Weseler Abfallgesellschaft mbH & Co. KG Abfallentsorgungszentrum Asdonkshof	Kreis Weseler Abfallgesellschaft mbH & Co. KG Abfallentsorgungszentrum Asdonkshof	5(b)	Installations for the incineration of non-hazardous waste in the scope of Directive 2000/76/EC of the European Parliament and of the Council of 4 December 2000 on the incineration of waste	6.57641	51.5189	Graftstr.	25	47475	Kamp-Lintfort	DE	0.05145	0.04095
2017	https://registry.gdi-de.org/id/de.nw.inspire.pf.bube-eureg/arb-2017-170020-100-0501870	Kreis Weseler Abfallgesellschaft mbH & Co. KG Abfallentsorgungszentrum Asdonkshof	Kreis Weseler Abfallgesellschaft mbH & Co. KG Abfallentsorgungszentrum Asdonkshof	5(b)	Installations for the incineration of non-hazardous waste in the scope of Directive 2000/76/EC of the European Parliament and of the Council of 4 December 2000 on the incineration of waste	6.57641	51.5189	Graftstr.	25	47475	Kamp-Lintfort	DE	0.10584	0.08424
2017	https://registry.gdi-de.org/id/de.nw.inspire.pf.bube-eureg/arb-2017-315000-300-1350016	AVG Abfallentsorgungs- und Verwertungsgesellschaft Köln mbH	AVG Abfallentsorgungs- und Verwertungsgesellschaft Köln mbH	5(b)	Installations for the incineration of non-hazardous waste in the scope of Directive 2000/76/EC of the European Parliament and of the Council of 4 December 2000 on the incineration of waste	6.94885	51.0069	Geestemünder Str.	23	50735	Köln	DE	0.12936	0.10296
2017	https://registry.gdi-de.org/id/de.nw.inspire.pf.bube-eureg/arb-2017-316000-300-0535035	AVEA Entsorgungsbetriebe GmbH & Co. KG	AVEA Entsorgungsbetriebe GmbH & Co. KG	5(b)	Installations for the incineration of non-hazardous waste in the scope of Directive 2000/76/EC of the European Parliament and of the Council of 4 December 2000 on the incineration of waste	7.0042	51.0423	Im Eisholz	3	51373	Leverkusen	DE	0.07546	0.06006
2017	https://registry.gdi-de.org/id/de.nw.inspire.pf.bube-eureg/arb-2017-316000-300-0535035	AVEA Entsorgungsbetriebe GmbH & Co. KG	AVEA Entsorgungsbetriebe GmbH & Co. KG	5(b)	Installations for the incineration of non-hazardous waste in the scope of Directive 2000/76/EC of the European Parliament and of the Council of 4 December 2000 on the incineration of waste	7.0042	51.0423	Im Eisholz	3	51373	Leverkusen	DE	0.037828	0.030108
2017	https://registry.gdi-de.org/id/de.nw.inspire.pf.bube-eureg/arb-2017-354012-300-9001747	MVA Weisweiler GmbH & Co. KG	MVA Weisweiler GmbH & Co. KG	5(b)	Installations for the incineration of non-hazardous waste in the scope of Directive 2000/76/EC of the European Parliament and of the Council of 4 December 2000 on the incineration of waste	6.30958	50.838	Zum Hagelkreuz	22	52249	Eschweiler	DE	0.18424	0.14664
2017	https://registry.gdi-de.org/id/de.nw.inspire.pf.bube-eureg/arb-2017-354012-300-9001747	MVA Weisweiler GmbH & Co. KG	MVA Weisweiler GmbH & Co. KG	5(b)	Installations for the incineration of non-hazardous waste in the scope of Directive 2000/76/EC of the European Parliament and of the Council of 4 December 2000 on the incineration of waste	6.30958	50.838	Zum Hagelkreuz	22	52249	Eschweiler	DE	0.09212	0.07332
2017	https://registry.gdi-de.org/id/de.nw.inspire.pf.bube-eureg/arb-2017-362028-300-9968049	EEW Energy from Waste Saarbrücken GmbH über InfraServ Knapsack GmbH	EEW Energy from Waste Saarbrücken GmbH	5(b)	Installations for the incineration of non-hazardous waste in the scope of Directive 2000/76/EC of the European Parliament and of the Council of 4 December 2000 on the incineration of waste	6.84358	50.8567	Industriestr.	-	50354	Hürth	DE	0.15876	0.12636
2017	https://registry.gdi-de.org/id/de.nw.inspire.pf.bube-eureg/arb-2017-362028-300-9968049	EEW Energy from Waste Saarbrücken GmbH über InfraServ Knapsack GmbH	EEW Energy from Waste Saarbrücken GmbH	5(b)	Installations for the incineration of non-hazardous waste in the scope of Directive 2000/76/EC of the European Parliament and of the Council of 4 December 2000 on the incineration of waste	6.84358	50.8567	Industriestr.	-	50354	Hürth	DE	0.07938	0.06318
2017	https://registry.gdi-de.org/id/de.nw.inspire.pf.bube-eureg/arb-2017-562020-500-0414594	AGR mbH	AGR mbH	5(b)	Installations for the incineration of non-hazardous waste in the scope of Directive 2000/76/EC of the European Parliament and of the Council of 4 December 2000 on the incineration of waste	7.16343	51.5565	Im Emscherbruch	11	45699	Herten	DE	0.33075	0.26325
2017	https://registry.gdi-de.org/id/de.nw.inspire.pf.bube-eureg/arb-2017-562020-500-0414594	AGR mbH	AGR mbH	5(b)	Installations for the incineration of non-hazardous waste in the scope of Directive 2000/76/EC of the European Parliament and of the Council of 4 December 2000 on the incineration of waste	7.16343	51.5565	Im Emscherbruch	11	45699	Herten	DE	0.19306	0.15366
2017	https://registry.gdi-de.org/id/de.nw.inspire.pf.bube-eureg/arb-2017-914000-900-0189517	Hagener Entsorgungsbetrieb HEB GmbH	Hagener Entsorgungsbetrieb HEB GmbH	5(b)	Installations for the incineration of non-hazardous waste in the scope of Directive 2000/76/EC of the European Parliament and of the Council of 4 December 2000 on the incineration of waste	7.47067	51.3776	Am Pfannenofen	39	58097	Hagen	DE	0.035525	0.028275
2017	https://registry.gdi-de.org/id/de.nw.inspire.pf.bube-eureg/arb-2017-914000-900-0189517	Hagener Entsorgungsbetrieb HEB GmbH	Hagener Entsorgungsbetrieb HEB GmbH	5(b)	Installations for the incineration of non-hazardous waste in the scope of Directive 2000/76/EC of the European Parliament and of the Council of 4 December 2000 on the incineration of waste	7.47067	51.3776	Am Pfannenofen	39	58097	Hagen	DE	0.04998	0.03978
2017	https://registry.gdi-de.org/id/de.nw.inspire.pf.bube-eureg/arb-2017-915000-900-0302988	MHB Hamm Betriebsführungsgesell schaft mbH	MHB Hamm Betriebsführungsgesell schaft mbH	5(b)	Installations for the incineration of non-hazardous waste in the scope of Directive 2000/76/EC of the European Parliament and of the Council of 4 December 2000 on the incineration of waste	7.74479	51.6801	Am Lausbach	2	59075	Hamm	DE	0.06125	0.04875
2017	https://registry.gdi-de.org/id/de.nw.inspire.pf.bube-eureg/arb-2017-915000-900-0302988	MHB Hamm Betriebsführungsgesell schaft mbH	MHB Hamm Betriebsführungsgesell schaft mbH	5(b)	Installations for the incineration of non-hazardous waste in the scope of Directive 2000/76/EC of the European Parliament and of the Council of 4 December 2000 on the incineration of waste	7.74479	51.6801	Am Lausbach	2	59075	Hamm	DE	0.1225	0.0975
2017	https://registry.gdi-de.org/id/de.nw.inspire.pf.bube-eureg/arb-2017-962024-900-0235202	AMK Abfallentsorgungsgesellschaft des Märkischen Kreises mbH	AMK Abfallentsorgungsgesellschaft des Märkischen Kreises mbH	5(b)	Installations for the incineration of non-hazardous waste in the scope of Directive 2000/76/EC of the European Parliament and of the Council of 4 December 2000 on the incineration of waste	7.69614	51.3979	Giesestr.	10	58636	Iserlohn	DE	0.05096	0.04056
2017	https://registry.gdi-de.org/id/de.nw.inspire.pf.bube-eureg/arb-2017-962024-900-0235202	AMK Abfallentsorgungsgesellschaft des Märkischen Kreises mbH	AMK Abfallentsorgungsgesellschaft des Märkischen Kreises mbH	5(b)	Installations for the incineration of non-hazardous waste in the scope of Directive 2000/76/EC of the European Parliament and of the Council of 4 December 2000 on the incineration of waste	7.69614	51.3979	Giesestr.	10	58636	Iserlohn	DE	0.031164	0.024804
2017	https://registry.gdi-de.org/id/de.rp.inspire.pf.bube-eureg/4000267	Entsorgungsgesellschaft Mainz mbH	Entsorgungsgesellschaft Mainz mbH	5(b)	Installations for the incineration of non-hazardous waste in the scope of Directive 2000/76/EC of the European Parliament and of the Council of 4 December 2000 on the incineration of waste	8.2384	50.0253	Kraftwerkallee	1	55120	Mainz	DE	0.07791	0.06201
2017	https://registry.gdi-de.org/id/de.rp.inspire.pf.bube-eureg/4000267	Entsorgungsgesellschaft Mainz mbH	Entsorgungsgesellschaft Mainz mbH	5(b)	Installations for the incineration of non-hazardous waste in the scope of Directive 2000/76/EC of the European Parliament and of the Council of 4 December 2000 on the incineration of waste	8.2384	50.0253	Kraftwerkallee	1	55120	Mainz	DE	0.15876	0.12636
2017	https://registry.gdi-de.org/id/de.rp.inspire.pf.bube-eureg/5000299	GML Abfallwirtschaftsgesellschaft mbH	GML Abfallwirtschaftsgesellschaft mbH	5(b)	Installations for the incineration of non-hazardous waste in the scope of Directive 2000/76/EC of the European Parliament and of the Council of 4 December 2000 on the incineration of waste	8.42636	49.4847	Bürgerm.-Grünzweig-Str.	87	67059	Ludwigshafen am Rhein	DE	0.08575	0.06825
2017	https://registry.gdi-de.org/id/de.sh/50079832	EEW Energy from Waste Stapelfeld GmbH	EEW Energy from Waste Stapelfeld GmbH	5(b)	Installations for the incineration of non-hazardous waste in the scope of Directive 2000/76/EC of the European Parliament and of the Council of 4 December 2000 on the incineration of waste	10.2245	53.6193	Ahrensburger Weg	4	22145	Stapelfeld	DE	0.07448	0.05928
2017	https://registry.gdi-de.org/id/de.sh/50079832	EEW Energy from Waste Stapelfeld GmbH	EEW Energy from Waste Stapelfeld GmbH	5(b)	Installations for the incineration of non-hazardous waste in the scope of Directive 2000/76/EC of the European Parliament and of the Council of 4 December 2000 on the incineration of waste	10.2245	53.6193	Ahrensburger Weg	4	22145	Stapelfeld	DE	0.15484	0.12324
2017	https://registry.gdi-de.org/id/de.sh/50080603	SWN Stadtwerke Neumünster GmbH	SWN Stadtwerke Neumünster GmbH	5(b)	Installations for the incineration of non-hazardous waste in the scope of Directive 2000/76/EC of the European Parliament and of the Council of 4 December 2000 on the incineration of waste	9.99102	54.083	Bismarckstr.	51	24534	Neumünster	DE	0.20825	0.16575
2017	https://registry.gdi-de.org/id/de.sh/50080603	SWN Stadtwerke Neumünster GmbH	SWN Stadtwerke Neumünster GmbH	5(b)	Installations for the incineration of non-hazardous waste in the scope of Directive 2000/76/EC of the European Parliament and of the Council of 4 December 2000 on the incineration of waste	9.99102	54.083	Bismarckstr.	51	24534	Neumünster	DE	0.13328	0.10608
2017	https://registry.gdi-de.org/id/de.sh/50081814	Müllverbrennung Kiel GmbH & Co. Kommanditgesellschaft	Müllverbrennung Kiel GmbH & Co. KG - Müllheizkraftwerk Kiel	5(b)	Installations for the incineration of non-hazardous waste in the scope of Directive 2000/76/EC of the European Parliament and of the Council of 4 December 2000 on the incineration of waste	10.1111	54.3073	Theodor-Heuss-Ring	30	24114	Kiel	DE	0.06272	0.04992
2017	https://registry.gdi-de.org/id/de.sh/50081814	Müllverbrennung Kiel GmbH & Co. Kommanditgesellschaft	Müllverbrennung Kiel GmbH & Co. KG - Müllheizkraftwerk Kiel	5(b)	Installations for the incineration of non-hazardous waste in the scope of Directive 2000/76/EC of the European Parliament and of the Council of 4 December 2000 on the incineration of waste	10.1111	54.3073	Theodor-Heuss-Ring	30	24114	Kiel	DE	0.030723	0.024453
2017	https://registry.gdi-de.org/id/de.sl.inspire.pf/0075674-G	AVA Velsen GmbH	AVA Velsen	5(b)	Installations for the incineration of non-hazardous waste in the scope of Directive 2000/76/EC of the European Parliament and of the Council of 4 December 2000 on the incineration of waste	6.83473	49.2143	Alte Grube Velsen	16	66127	Saarbrücken	DE	0.1225	0.0975
2017	https://registry.gdi-de.org/id/de.sl.inspire.pf/0075674-G	AVA Velsen GmbH	AVA Velsen	5(b)	Installations for the incineration of non-hazardous waste in the scope of Directive 2000/76/EC of the European Parliament and of the Council of 4 December 2000 on the incineration of waste	6.83473	49.2143	Alte Grube Velsen	16	66127	Saarbrücken	DE	0.05782	0.04602
2017	https://registry.gdi-de.org/id/de.sl.inspire.pf/0078532-G	EEW Energy from Waste Saarbrücken GmbH	AHKW Neunkirchen	5(b)	Installations for the incineration of non-hazardous waste in the scope of Directive 2000/76/EC of the European Parliament and of the Council of 4 December 2000 on the incineration of waste	7.1684	49.3381	Am Blücherflöz	12	66538	Neunkirchen	DE	0.034055	0.027105
2017	https://registry.gdi-de.org/id/de.sl.inspire.pf/0078532-G	EEW Energy from Waste Saarbrücken GmbH	AHKW Neunkirchen	5(b)	Installations for the incineration of non-hazardous waste in the scope of Directive 2000/76/EC of the European Parliament and of the Council of 4 December 2000 on the incineration of waste	7.1684	49.3381	Am Blücherflöz	12	66538	Neunkirchen	DE	0.06811	0.05421
2017	IE.CAED/W0167.FACILITY	Indaver Ireland Limited	Indaver Ireland Limited (Duleek)	5(b)	Installations for the incineration of non-hazardous waste in the scope of Directive 2000/76/EC of the European Parliament and of the Council of 4 December 2000 on the incineration of waste	-6.39175	53.6769	Carranstown	Duleek		Meath	IE	0.14847	0.11817
2017	IE.CAED/W0232.FACILITY	Dublin Waste to Energy Limited	Dublin Waste to Energy Limited	5(b)	Installations for the incineration of non-hazardous waste in the scope of Directive 2000/76/EC of the European Parliament and of the Council of 4 December 2000 on the incineration of waste	-6.20038	53.339	Pigeon House Road	Poolbeg Peninsula	D04N2P2	Dublin	IE	0.19747	0.15717
2017	IS.CAED/600407-0580	Molta ehf.	Molta ehf.	5(e)	Installations for the disposal or recycling of animal carcasses and animal waste	-17.723	65.6778	Þveráreyrar	1	601	Eyjafjarðarsveit	IS	0.0011123	0.0008853
2017	IT.CAED/051002003.FACILITY	CONFIDENTIAL	CONFIDENTIAL	5(b)	Installations for the incineration of non-hazardous waste in the scope of Directive 2000/76/EC of the European Parliament and of the Council of 4 December 2000 on the incineration of waste	12.6615	42.5806	CONFIDENTIAL	CONFIDENTIAL	CONFIDENTIAL	CONFIDENTIAL	IT	0.05831	0.04641
2017	IT.CAED/101372002.FACILITY	TRATTAMENTO RIFIUTI METROPOLITANI TRM SPA	TRM - TERMOVALORIZZATORE DEL GERBIDO	5(b)	Installations for the incineration of non-hazardous waste in the scope of Directive 2000/76/EC of the European Parliament and of the Council of 4 December 2000 on the incineration of waste	7.5856	45.0381	VIA PAOLO GORINI	50	10137	TORINO	IT	0.26215	0.20865
2017	IT.CAED/200562001.FACILITY	Falck Renewables SpA	IMPIANTO DI TERMOVALORIZZAZIONE RIFIUTI SOLIDI URBANI E NON PERICOLOSI	5(b)	Installations for the incineration of non-hazardous waste in the scope of Directive 2000/76/EC of the European Parliament and of the Council of 4 December 2000 on the incineration of waste	9.5078	45.5936	Via Giulio Pastore	2	20056	TREZZO SULL'ADDA	IT	0.11319	0.09009
2017	IT.CAED/201532001.FACILITY	A2A Ambiente S.p.A.	Impianto di termovalorizzazione Silla 2	5(b)	Installations for the incineration of non-hazardous waste in the scope of Directive 2000/76/EC of the European Parliament and of the Council of 4 December 2000 on the incineration of waste	9.0706	45.5042	via Lucio Cornelio Silla	249	20153	MILANO	IT	0.13524	0.10764
2017	IT.CAED/238682003.FACILITY	SILEA SPA	Impianto di termovalorizzazione di Valmadrera	5(b)	Installations for the incineration of non-hazardous waste in the scope of Directive 2000/76/EC of the European Parliament and of the Council of 4 December 2000 on the incineration of waste	9.3583	45.8378	Via Leonardo Vassena	6	23868	VALMADRERA	IT	0.06174	0.04914
2017	IT.CAED/240442001.FACILITY	REA Dalmine SpA	REA Dalmine SpA	5(b)	Installations for the incineration of non-hazardous waste in the scope of Directive 2000/76/EC of the European Parliament and of the Council of 4 December 2000 on the incineration of waste	9.6097	45.6356	via Dossi	SNC	24044	DALMINE	IT	0.09359	0.07449
2017	IT.CAED/290102006.FACILITY	BUZZI UNICEM SPA	CEMENTERIA DI VERNASCA	5(b)	Installations for the incineration of non-hazardous waste in the scope of Directive 2000/76/EC of the European Parliament and of the Council of 4 December 2000 on the incineration of waste	9.8	44.7667	Localita' Mocomero	SNC	29010	VERNASCA	IT	0.20923	0.16653
2017	IT.CAED/291222006.FACILITY	Iren Ambiente S.p.A.	Wte Piacenza	5(b)	Installations for the incineration of non-hazardous waste in the scope of Directive 2000/76/EC of the European Parliament and of the Council of 4 December 2000 on the incineration of waste	9.6667	45.0417	Strada Borgoforte,	22	29122	PIACENZA	IT	0.05096	0.04056
2017	IT.CAED/341472001.FACILITY	HestAmbiente S.r.l.	Impianto di Termovalorizzazione Rifiuti di Trieste - via Errera 11	5(b)	Installations for the incineration of non-hazardous waste in the scope of Directive 2000/76/EC of the European Parliament and of the Council of 4 December 2000 on the incineration of waste	13.7994	45.6111	Via Errera	11	34147	TRIESTE	IT	0.07791	0.06201
2017	IT.CAED/351272002.FACILITY	HestAmbiente SrL	Impianto di Termovalorizzazione di San Lazzaro (PD)	5(b)	Installations for the incineration of non-hazardous waste in the scope of Directive 2000/76/EC of the European Parliament and of the Council of 4 December 2000 on the incineration of waste	11.9231	45.4083	viale della Navigazione Interna	34	35127	PADOVA	IT	0.10094	0.08034
2017	IT.CAED/400572001.FACILITY	Frullo Energia Ambiente Srl	Impianto di termovalorizzazione rifiuti	5(b)	Installations for the incineration of non-hazardous waste in the scope of Directive 2000/76/EC of the European Parliament and of the Council of 4 December 2000 on the incineration of waste	11.4311	44.5239	via Del Frullo	5	40057	GRANAROLO DELL'EMILIA	IT	0.09212	0.07332
2017	IT.CAED/471222018.FACILITY	HERAMBIENTE SpA	IMPIANTO DI TERMOVALORIZZAZIONE RIFIUTI NON PERICOLOSI	5(b)	Installations for the incineration of non-hazardous waste in the scope of Directive 2000/76/EC of the European Parliament and of the Council of 4 December 2000 on the incineration of waste	12.0883	44.2331	via Grigioni	19	47122	FORLI'	IT	0.07056	0.05616
2017	IT.CAED/478532001.FACILITY	HERAMBIENTE SPA	IMPIANTO DI TERMOVALORIZZAZIONE DI RIFIUTI NON PERICOLOSI	5(b)	Installations for the incineration of non-hazardous waste in the scope of Directive 2000/76/EC of the European Parliament and of the Council of 4 December 2000 on the incineration of waste	12.6345	43.9793	via Raibano	32	47853	CORIANO	IT	0.0637	0.0507
2017	IT.CAED/860772001.FACILITY	CONFIDENTIAL	CONFIDENTIAL	5(b)	Installations for the incineration of non-hazardous waste in the scope of Directive 2000/76/EC of the European Parliament and of the Council of 4 December 2000 on the incineration of waste	14.1103	41.5136	CONFIDENTIAL	CONFIDENTIAL	CONFIDENTIAL	CONFIDENTIAL	IT	0.05488	0.04368
2017	LT.CAED/301276531.FACILITY	UAB „Fortum Klaipėda“	UAB „Fortum Klaipėda“	5(b)	Installations for the incineration of non-hazardous waste in the scope of Directive 2000/76/EC of the European Parliament and of the Council of 4 December 2000 on the incineration of waste	21.2029	55.681	Kretainio Str.	3	LT-94103	Klaipeda	LT	0.06615	0.05265
2017	LU.CAED/000007000.FACILITY	Sidor	Sidor	5(b)	Installations for the incineration of non-hazardous waste in the scope of Directive 2000/76/EC of the European Parliament and of the Council of 4 December 2000 on the incineration of waste	6.06991	49.5537	Route de Bettembourg	/	3205	Leudelange	LU	0.09604	0.07644
2017	NL.RIVM/000010063.FACILITY	AVR-Afvalverwerking B.V.	AVR NV (Rijnmond)	5(b)	Installations for the incineration of non-hazardous waste in the scope of Directive 2000/76/EC of the European Parliament and of the Council of 4 December 2000 on the incineration of waste	4.27639	51.897	Professor Gerbrandyweg	10	3197KK	Botlek Rotterdam	NL	0.8183	0.6513
2017	NL.RIVM/000010076.FACILITY	HVCafvalcentrale	HVC Afvalcentrale Dordrecht	5(b)	Installations for the incineration of non-hazardous waste in the scope of Directive 2000/76/EC of the European Parliament and of the Council of 4 December 2000 on the incineration of waste	4.73767	51.8154	Baanhoekweg	40	3313LA	Dordrecht	NL	0.15925	0.12675
2017	NL.RIVM/000012158.FACILITY	HVC	DRSH Zuiveringsslib N.V.	5(b)	Installations for the incineration of non-hazardous waste in the scope of Directive 2000/76/EC of the European Parliament and of the Council of 4 December 2000 on the incineration of waste	4.74067	51.8165	Baanhoekweg	40	3313LA	Dordrecht	NL	0.06566	0.05226
2017	NL.RIVM/000028085.FACILITY	AEB exploitatie BV	Afval Energie Bedrijf (Amsterdam)	5(b)	Installations for the incineration of non-hazardous waste in the scope of Directive 2000/76/EC of the European Parliament and of the Council of 4 December 2000 on the incineration of waste	4.79289	52.3997	Australiëhavenweg	21	1045BA	Amsterdam	NL	0.7546	0.6006
2017	NL.RIVM/000028091.FACILITY	HVC	HVC (Alkmaar)	5(b)	Installations for the incineration of non-hazardous waste in the scope of Directive 2000/76/EC of the European Parliament and of the Council of 4 December 2000 on the incineration of waste	4.76268	52.6098	Jadestraat	1	1812RD	Alkmaar	NL	0.5194	0.4134
2017	NL.RIVM/000044007.FACILITY	SITA ReEnergy Roosendaal B.V.	SUEZ ReEnergy Roosendaal	5(b)	Installations for the incineration of non-hazardous waste in the scope of Directive 2000/76/EC of the European Parliament and of the Council of 4 December 2000 on the incineration of waste	4.44382	51.5485	Potendreef	2	4703RK	Roosendaal	NL	0.16954	0.13494
2017	NL.RIVM/000044009.FACILITY	Attero	Attero BV (Moerdijk)	5(b)	Installations for the incineration of non-hazardous waste in the scope of Directive 2000/76/EC of the European Parliament and of the Council of 4 December 2000 on the incineration of waste	4.58162	51.6833	MIDDENWEG	34	4782PM	Moerdijk	NL	0.4998	0.3978
2017	NL.RIVM/000047001.FACILITY	Slibverwerking Noord-Brabant NV	Slibverwerking Noord-Brabant	5(b)	Installations for the incineration of non-hazardous waste in the scope of Directive 2000/76/EC of the European Parliament and of the Council of 4 December 2000 on the incineration of waste	4.58016	51.6896	Middenweg	38	4782PM	Moerdijk	NL	0.07448	0.05928
2017	NL.RIVM/000064004.FACILITY	AVR Afvalverwerking B.V. vestiging Duiven	AVR Afvalverwerking BV (Duiven)	5(b)	Installations for the incineration of non-hazardous waste in the scope of Directive 2000/76/EC of the European Parliament and of the Council of 4 December 2000 on the incineration of waste	6.00036	51.9705	Rivierweg	20	6921PZ	Duiven	NL	0.26607	0.21177
2017	NL.RIVM/000064005.FACILITY	ARN B.V.	ARN B.V.	5(b)	Installations for the incineration of non-hazardous waste in the scope of Directive 2000/76/EC of the European Parliament and of the Council of 4 December 2000 on the incineration of waste	5.79452	51.8463	Nieuwe Pieckelaan	1	6551DX	Weurt	NL	0.16807	0.13377
2017	NL.RIVM/000075305.FACILITY	Twence Holding B.V.	Twence BV Boeldershoek	5(b)	Installations for the incineration of non-hazardous waste in the scope of Directive 2000/76/EC of the European Parliament and of the Council of 4 December 2000 on the incineration of waste	6.78419	52.2343	Boldershoekweg	51	7554RT	Hengelo	NL	0.4459	0.3549
2017	NL.RIVM/000085002.FACILITY	Attero BV	Attero Noord BV	5(b)	Installations for the incineration of non-hazardous waste in the scope of Directive 2000/76/EC of the European Parliament and of the Council of 4 December 2000 on the incineration of waste	6.51498	52.7913	VAMWEG	7	9418TM	Wijster	NL	0.28224	0.22464
2017	NL.RIVM/000203496.FACILITY	Omrin B.V.	Reststoffen Energie Centrale (REC)	5(b)	Installations for the incineration of non-hazardous waste in the scope of Directive 2000/76/EC of the European Parliament and of the Council of 4 December 2000 on the incineration of waste	5.4291	53.1904	Lange Lijnbaan	14	8861NW	Harlingen	NL	0.13034	0.10374
2017	PT.CAED/PT.APA05764642.CI	Valorsul - Valorização e Tratamento de Resíduos Sólidos das Regiões de Lisboa e do Oeste, S.A.	CI - CTRSU - Central de Tratamento de Resíduos Sólidos Urbanos	5(b)	Installations for the incineration of non-hazardous waste in the scope of Directive 2000/76/EC of the European Parliament and of the Council of 4 December 2000 on the incineration of waste	-9.08244	38.8276	Plataforma Ribeirinha da CP - Estação de Mercadorias da Bobadela	None	2696-801	SÃO JOÃO DA TALHA	PT	0.25921	0.20631
2017	PT.CAED/PT.APA05769882.CI	CAMPOAVES - AVES DO CAMPO, SA	CI - Campoaves - Unidade de Transformação de Subprodutos	5(e)	Installations for the disposal or recycling of animal carcasses and animal waste	-8.84792	40.1062	Parque Industrial da Figueira da Foz, Lote 103 S. Pedro	None	3090-711	FIGUEIRA DA FOZ	PT	0.1911	0.1521
2017	PT.CAED/PT.APA05770322.CI	Lipor-Serviço Intermunicipalizados de Gestão Resíduos Grande Porto	CI - Central de Valorização Energética e Confinamento Técnico	5(b)	Installations for the incineration of non-hazardous waste in the scope of Directive 2000/76/EC of the European Parliament and of the Council of 4 December 2000 on the incineration of waste	-8.65048	41.2284	Lugar de Crestins - Apartado 3102 Crestins	None	4471-907	MAIA	PT	0.17689	0.14079
2017	SE.CAED/10014053.Facility	Stockholm Exergi	HÖGDALENVERKET	5(b)	Installations for the incineration of non-hazardous waste in the scope of Directive 2000/76/EC of the European Parliament and of the Council of 4 December 2000 on the incineration of waste	18.0607	59.2576	Kvicksundsvägen 16		12459	STOCKHOLM	SE	0.12348	0.09828
2017	SE.CAED/10014053.Facility	Stockholm Exergi	HÖGDALENVERKET	5(b)	Installations for the incineration of non-hazardous waste in the scope of Directive 2000/76/EC of the European Parliament and of the Council of 4 December 2000 on the incineration of waste	18.0607	59.2576	Kvicksundsvägen 16		12459	STOCKHOLM	SE	0.35378	0.28158
2017	SE.CAED/10014459.Facility	Vattenfall AB, Värme Uppsala	Boländeranläggningarna, Avfallsförbränningsanläggn	5(b)	Installations for the incineration of non-hazardous waste in the scope of Directive 2000/76/EC of the European Parliament and of the Council of 4 December 2000 on the incineration of waste	17.6758	59.8522	Bolandsgatan 13		753 23	Uppsala	SE	0.18326	0.14586
2017	SE.CAED/10014459.Facility	Vattenfall AB, Värme Uppsala	Boländeranläggningarna, Avfallsförbränningsanläggn	5(b)	Installations for the incineration of non-hazardous waste in the scope of Directive 2000/76/EC of the European Parliament and of the Council of 4 December 2000 on the incineration of waste	17.6758	59.8522	Bolandsgatan 13		753 23	Uppsala	SE	0.08036	0.06396
2017	SE.CAED/10014627.Facility	Vattenfall AB Värme Nyköping	Idbäckens Kraftvärmeverk	5(b)	Installations for the incineration of non-hazardous waste in the scope of Directive 2000/76/EC of the European Parliament and of the Council of 4 December 2000 on the incineration of waste	17.0011	58.7432	Idbäcksvägen 16		61138	NYKÖPING	SE	0.0833	0.0663
2017	SE.CAED/10014627.Facility	Vattenfall AB Värme Nyköping	Idbäckens Kraftvärmeverk	5(b)	Installations for the incineration of non-hazardous waste in the scope of Directive 2000/76/EC of the European Parliament and of the Council of 4 December 2000 on the incineration of waste	17.0011	58.7432	Idbäcksvägen 16		61138	NYKÖPING	SE	0.00021707	0.00017277
2017	SE.CAED/10014984.Facility	Tekniska Verken I Linköping AB	Gärstadverket	5(b)	Installations for the incineration of non-hazardous waste in the scope of Directive 2000/76/EC of the European Parliament and of the Council of 4 December 2000 on the incineration of waste	15.6545	58.4367	Gärstadsvägen 3		58115	Linköping	SE	0.26019	0.20709
2017	SE.CAED/10014984.Facility	Tekniska Verken I Linköping AB	Gärstadverket	5(b)	Installations for the incineration of non-hazardous waste in the scope of Directive 2000/76/EC of the European Parliament and of the Council of 4 December 2000 on the incineration of waste	15.6545	58.4367	Gärstadsvägen 3		58115	Linköping	SE	0.12838	0.10218
2017	SE.CAED/10015102.Facility	E.ON Värme Sverige AB	Händelöverket	5(b)	Installations for the incineration of non-hazardous waste in the scope of Directive 2000/76/EC of the European Parliament and of the Council of 4 December 2000 on the incineration of waste	16.2333	58.6196	Energigatan 5		60238	Norrköping	SE	0.08722	0.06942
2017	SE.CAED/10015102.Facility	E.ON Värme Sverige AB	Händelöverket	5(b)	Installations for the incineration of non-hazardous waste in the scope of Directive 2000/76/EC of the European Parliament and of the Council of 4 December 2000 on the incineration of waste	16.2333	58.6196	Energigatan 5		60238	Norrköping	SE	0.38367	0.30537
2017	SE.CAED/10015586.Facility	Jönköping Energi AB	Kraftvärmeverket Torsvik, KVVT1 (avfall) och KVVT2 (flis)	5(b)	Installations for the incineration of non-hazardous waste in the scope of Directive 2000/76/EC of the European Parliament and of the Council of 4 December 2000 on the incineration of waste	14.1517	57.696	Energivägen		55652	Jönköping	SE	0.15337	0.12207
2017	SE.CAED/10015586.Facility	Jönköping Energi AB	Kraftvärmeverket Torsvik, KVVT1 (avfall) och KVVT2 (flis)	5(b)	Installations for the incineration of non-hazardous waste in the scope of Directive 2000/76/EC of the European Parliament and of the Council of 4 December 2000 on the incineration of waste	14.1517	57.696	Energivägen		55652	Jönköping	SE	0.03283	0.02613
2017	SE.CAED/10017666.Facility	SYSAV AB	Sysavs avfallsförbränningsanläggning	5(b)	Installations for the incineration of non-hazardous waste in the scope of Directive 2000/76/EC of the European Parliament and of the Council of 4 December 2000 on the incineration of waste	13.0453	55.632	Spillepengsgatan 13		211 24	MALMÖ	SE	0.09898	0.07878
2017	SE.CAED/10017666.Facility	SYSAV AB	Sysavs avfallsförbränningsanläggning	5(b)	Installations for the incineration of non-hazardous waste in the scope of Directive 2000/76/EC of the European Parliament and of the Council of 4 December 2000 on the incineration of waste	13.0453	55.632	Spillepengsgatan 13		211 24	MALMÖ	SE	0.27881	0.22191
2017	SE.CAED/10017854.Facility	Öresundskraft Kraft&Värme AB	Filborna Kraftvärmeverk	5(b)	Installations for the incineration of non-hazardous waste in the scope of Directive 2000/76/EC of the European Parliament and of the Council of 4 December 2000 on the incineration of waste	12.766	56.0693	Hjortshögsvägen 7		25189	Helsingborg	SE	0.040768	0.032448
2017	SE.CAED/10017854.Facility	Öresundskraft Kraft&Värme AB	Filborna Kraftvärmeverk	5(b)	Installations for the incineration of non-hazardous waste in the scope of Directive 2000/76/EC of the European Parliament and of the Council of 4 December 2000 on the incineration of waste	12.766	56.0693	Hjortshögsvägen 7		25189	Helsingborg	SE	0.10192	0.08112
2017	SE.CAED/10018458.Facility	Halmstads Energi och Miljö AB	Kristinehedsverket	5(b)	Installations for the incineration of non-hazardous waste in the scope of Directive 2000/76/EC of the European Parliament and of the Council of 4 December 2000 on the incineration of waste	12.906	56.6921	Kristinehedsvägen		30244	Halmstad	SE	0.09996	0.07956
2017	SE.CAED/10018458.Facility	Halmstads Energi och Miljö AB	Kristinehedsverket	5(b)	Installations for the incineration of non-hazardous waste in the scope of Directive 2000/76/EC of the European Parliament and of the Council of 4 December 2000 on the incineration of waste	12.906	56.6921	Kristinehedsvägen		30244	Halmstad	SE	0.041895	0.033345
2017	SE.CAED/10019386.Facility	Renova AB	Sävenäs	5(b)	Installations for the incineration of non-hazardous waste in the scope of Directive 2000/76/EC of the European Parliament and of the Council of 4 December 2000 on the incineration of waste	12.0524	57.732	von Utfallsgatan 29		41505	GÖTEBORG	SE	0.08673	0.06903
2017	SE.CAED/10019386.Facility	Renova AB	Sävenäs	5(b)	Installations for the incineration of non-hazardous waste in the scope of Directive 2000/76/EC of the European Parliament and of the Council of 4 December 2000 on the incineration of waste	12.0524	57.732	von Utfallsgatan 29		41505	GÖTEBORG	SE	0.26264	0.20904
2017	SE.CAED/10019709.Facility	Uddevalla Kraft AB	Lillesjö Avfallskraftvärmeverk	5(b)	Installations for the incineration of non-hazardous waste in the scope of Directive 2000/76/EC of the European Parliament and of the Council of 4 December 2000 on the incineration of waste	11.9954	58.3666	Nitstansvägen 2		45155	Uddevalla	SE	0.024059	0.019149
2017	SE.CAED/10019709.Facility	Uddevalla Kraft AB	Lillesjö Avfallskraftvärmeverk	5(b)	Installations for the incineration of non-hazardous waste in the scope of Directive 2000/76/EC of the European Parliament and of the Council of 4 December 2000 on the incineration of waste	11.9954	58.3666	Nitstansvägen 2		45155	Uddevalla	SE	0.06223	0.04953
2017	SE.CAED/10020018.Facility	Lidköping Energi AB	Lidköpings Värmeverk, Filen	5(b)	Installations for the incineration of non-hazardous waste in the scope of Directive 2000/76/EC of the European Parliament and of the Council of 4 December 2000 on the incineration of waste	13.1741	58.5076	Sjöhagsgatan 8		53140	LIDKÖPING	SE	0.11466	0.09126
2017	SE.CAED/10020018.Facility	Lidköping Energi AB	Lidköpings Värmeverk, Filen	5(b)	Installations for the incineration of non-hazardous waste in the scope of Directive 2000/76/EC of the European Parliament and of the Council of 4 December 2000 on the incineration of waste	13.1741	58.5076	Sjöhagsgatan 8		53140	LIDKÖPING	SE	0.026019	0.020709
2017	UK.CAED/EW_EA-12834.FACILITY	Lakeside Energy From Waste Limited	Lakeside EfW Facility EPR/BT7116IW	5(b)	Installations for the incineration of non-hazardous waste in the scope of Directive 2000/76/EC of the European Parliament and of the Council of 4 December 2000 on the incineration of waste	-0.506481	51.4851	Lakeside Road	Lakeside Energy from Waste Facility	SL3 0EG	SLOUGH	GB	0.18375	0.14625
2017	UK.CAED/EW_EA-13672.FACILITY	Veolia ES South Downs Limited	NEWHAVEN INCINERATOR	5(b)	Installations for the incineration of non-hazardous waste in the scope of Directive 2000/76/EC of the European Parliament and of the Council of 4 December 2000 on the incineration of waste	0.05205	50.8022	North Quay	Newhaven Energy Recovery Facility	BN9 0HE	NEWHAVEN	GB	0.09849	0.07839
2017	UK.CAED/EW_EA-13691.FACILITY	Riverside Resource Recovery Limited	RIVERSIDE RESOURCE RECOVERY	5(b)	Installations for the incineration of non-hazardous waste in the scope of Directive 2000/76/EC of the European Parliament and of the Council of 4 December 2000 on the incineration of waste	0.155422	51.5051	NORMAN ROAD	NA	DA17 6JY	BELVEDERE	GB	0.6223	0.4953
2017	UK.CAED/EW_EA-16008.FACILITY	Veolia ES Staffordshire Limited	Staffordshire Energy Recovery Facility EPR/HP3431HK/V003	5(b)	Installations for the incineration of non-hazardous waste in the scope of Directive 2000/76/EC of the European Parliament and of the Council of 4 December 2000 on the incineration of waste	-2.11457	52.6727	Enterprise Drive	The Dell	WV10 7DF	WOLVERHAMPTON	GB	0.07448	0.05928
2017	UK.CAED/EW_EA-16008.FACILITY	Veolia ES Staffordshire Limited	Staffordshire Energy Recovery Facility EPR/HP3431HK/V003	5(b)	Installations for the incineration of non-hazardous waste in the scope of Directive 2000/76/EC of the European Parliament and of the Council of 4 December 2000 on the incineration of waste	-2.11457	52.6727	Enterprise Drive	The Dell	WV10 7DF	WOLVERHAMPTON	GB	0.14896	0.11856
2017	UK.CAED/EW_EA-16079.FACILITY	FCC Environment (Lincolnshire) Limited	Lincolnshire EfW Facility	5(b)	Installations for the incineration of non-hazardous waste in the scope of Directive 2000/76/EC of the European Parliament and of the Council of 4 December 2000 on the incineration of waste	-0.595037	53.1994	Paving Way, off Whisby Road	Lincolnshire EfW Facility	LN6 3QZ	Lincoln	GB	0.08624	0.06864
2017	UK.CAED/EW_EA-16776.FACILITY	Ancillary Components Limited	Goosey Lodge EPR/NP3338SZ	5(b)	Installations for the incineration of non-hazardous waste in the scope of Directive 2000/76/EC of the European Parliament and of the Council of 4 December 2000 on the incineration of waste	-0.590956	52.2635	NA	Goosey Lodge	NN10 9LU	RUSHDEN	GB	0.0686	0.0546
2017	UK.CAED/EW_EA-16783.FACILITY	Veolia ES Hampshire Limited	Integra South East Energy Recovery Facility	5(b)	Installations for the incineration of non-hazardous waste in the scope of Directive 2000/76/EC of the European Parliament and of the Council of 4 December 2000 on the incineration of waste	-1.05446	50.8218	Quartremaine Road	NA	PO3 5QH	Copnor	GB	0.08918	0.07098
2017	UK.CAED/EW_EA-16798.FACILITY	SUEZ Recycling and Recovery Kirklees Ltd	Kirklees EfW EPR/BJ6178IX	5(b)	Installations for the incineration of non-hazardous waste in the scope of Directive 2000/76/EC of the European Parliament and of the Council of 4 December 2000 on the incineration of waste	-1.77755	53.6551	Vine Street	SUEZ	HD1 6BZ	Huddersfield	GB	0.0637	0.0507
2017	UK.CAED/EW_EA-16899.FACILITY	Viridor Waste Management Limited	Ardley EfW Plant EPR/FP3134GU	5(b)	Installations for the incineration of non-hazardous waste in the scope of Directive 2000/76/EC of the European Parliament and of the Council of 4 December 2000 on the incineration of waste	-1.21542	51.933	NA	Ardley Fields Farm	OX27 7PH	BICESTER	GB	0.0588	0.0468
2017	UK.CAED/EW_EA-16899.FACILITY	Viridor Waste Management Limited	Ardley EfW Plant EPR/FP3134GU	5(b)	Installations for the incineration of non-hazardous waste in the scope of Directive 2000/76/EC of the European Parliament and of the Council of 4 December 2000 on the incineration of waste	-1.21542	51.933	NA	Ardley Fields Farm	OX27 7PH	BICESTER	GB	0.147	0.117
2017	UK.CAED/EW_EA-16950.FACILITY	Viridor Waste Management Limited	Runcorn Energy From Waste Facility	5(b)	Installations for the incineration of non-hazardous waste in the scope of Directive 2000/76/EC of the European Parliament and of the Council of 4 December 2000 on the incineration of waste	-2.75461	53.3291	Barlow Way	NA	WA7 4HG	Runcorn	GB	0.46697	0.37167
2017	UK.CAED/EW_EA-16950.FACILITY	Viridor Waste Management Limited	Runcorn Energy From Waste Facility	5(b)	Installations for the incineration of non-hazardous waste in the scope of Directive 2000/76/EC of the European Parliament and of the Council of 4 December 2000 on the incineration of waste	-2.75461	53.3291	Barlow Way	NA	WA7 4HG	Runcorn	GB	0.23569	0.18759
2017	UK.CAED/EW_EA-16978.FACILITY	SUEZ Recycling and Recovery Suffolk Ltd	Suffolk EfW Facility EPR/WP3438HZ	5(b)	Installations for the incineration of non-hazardous waste in the scope of Directive 2000/76/EC of the European Parliament and of the Council of 4 December 2000 on the incineration of waste	1.09852	52.104	Lodge Lane	SITA Suffolk Ltd	IP6 0JE	IPSWICH	GB	0.12838	0.10218
2017	UK.CAED/EW_EA-17008.FACILITY	EPR Eye Limited	Eye Power Station EPR/BP3635LA	5(b)	Installations for the incineration of non-hazardous waste in the scope of Directive 2000/76/EC of the European Parliament and of the Council of 4 December 2000 on the incineration of waste	1.12865	52.3357	Oaksmere Business Park	EPR Eye Limited	IP23 7DH	Eye	GB	0.15141	0.12051
2017	UK.CAED/EW_EA-17836.FACILITY	SUEZ Recycling and Recovery UK Ltd	Wilton 11 EfW EPR/XP3436WB	5(b)	Installations for the incineration of non-hazardous waste in the scope of Directive 2000/76/EC of the European Parliament and of the Council of 4 December 2000 on the incineration of waste	-1.12253	54.59	Wilton International	Wilton 11 EfW Plant	TS90 8WS	Middlesbrough	GB	0.19257	0.15327
2017	UK.CAED/EW_EA-1786.FACILITY	MES Environmental Limited	Dudley Energy from Waste Facility EPR/AP3435SD	5(b)	Installations for the incineration of non-hazardous waste in the scope of Directive 2000/76/EC of the European Parliament and of the Council of 4 December 2000 on the incineration of waste	-2.08289	52.4991	Lister Road	Dudley Energy from Waste Facility	DY2 8JT	DUDLEY	GB	0.05684	0.04524
2017	UK.CAED/EW_EA-1787.FACILITY	MES Environmental Limited	Stoke EfW Facility	5(b)	Installations for the incineration of non-hazardous waste in the scope of Directive 2000/76/EC of the European Parliament and of the Council of 4 December 2000 on the incineration of waste	-2.18274	52.9879	Campbell Road	NA	ST4 4DX	Sideway	GB	0.10388	0.08268
2017	UK.CAED/EW_EA-18367.FACILITY	SUEZ Recycling and Recovery UK Ltd	Cornwall Energy Recovery Centre EPR/GP3433GH	5(b)	Installations for the incineration of non-hazardous waste in the scope of Directive 2000/76/EC of the European Parliament and of the Council of 4 December 2000 on the incineration of waste	-4.89128	50.3766	NA	Cornwall Energy Recovery Centre	PL26 8DY	St. Austell	GB	0.07693	0.06123
2017	UK.CAED/EW_EA-18515.FACILITY	Viridor Peterborough Limited	Peterborough Energy Recovery Facility	5(b)	Installations for the incineration of non-hazardous waste in the scope of Directive 2000/76/EC of the European Parliament and of the Council of 4 December 2000 on the incineration of waste	-0.205853	52.5751	Fourth Drove	Energy From Waste Facility	PE1 5UR	PETERBOROUGH	GB	0.07497	0.05967
2017	UK.CAED/EW_EA-18626.FACILITY	Ferrybridge MFE Limited	Ferrybridge Multifuel Plant EPR/SP3239FU	5(b)	Installations for the incineration of non-hazardous waste in the scope of Directive 2000/76/EC of the European Parliament and of the Council of 4 December 2000 on the incineration of waste	-1.28173	53.7167	Stranglands Lane	Ferrybridge 'C' Power Station	WF11 8SQ	Knottingley	GB	0.4998	0.3978
2017	UK.CAED/EW_EA-18795.FACILITY	SUEZ Recycling and Recovery UK Ltd	Severnside Energy Recovery Centre EPR/ZP3937KL	5(b)	Installations for the incineration of non-hazardous waste in the scope of Directive 2000/76/EC of the European Parliament and of the Council of 4 December 2000 on the incineration of waste	-2.6534	51.529	Severn Road	Severside Energy Recovery Centre	BS10 7SP	BRISTOL	GB	0.13573	0.10803
2017	UK.CAED/EW_EA-1986.FACILITY	Veolia ES Sheffield Limited	SHEFFIELD ENERGY RECOVERY FACILITY	5(b)	Installations for the incineration of non-hazardous waste in the scope of Directive 2000/76/EC of the European Parliament and of the Council of 4 December 2000 on the incineration of waste	-1.44922	53.387	Bernard Road	NA	S4 7YX	Sheffield	GB	0.10143	0.08073
2017	UK.CAED/EW_EA-2489.FACILITY	Suez Recycling And Recovery Tees Valley Ltd	Teesside EfW Plant EPR/VP3034SG	5(b)	Installations for the incineration of non-hazardous waste in the scope of Directive 2000/76/EC of the European Parliament and of the Council of 4 December 2000 on the incineration of waste	-1.25862	54.5954	Haverton Hill Road	Teesside energy from Waste Plant	TS23 1PY	BILLINGHAM	GB	0.27587	0.21957
2017	UK.CAED/EW_EA-2520.FACILITY	South East London Combined Heat and Power Limited	SELCHP Energy Recovery Facility	5(b)	Installations for the incineration of non-hazardous waste in the scope of Directive 2000/76/EC of the European Parliament and of the Council of 4 December 2000 on the incineration of waste	-0.0464367	51.4855	Landmann Way	The Kennels Site	SE14 5RS	LONDON	GB	0.19845	0.15795
2017	UK.CAED/EW_EA-2520.FACILITY	South East London Combined Heat and Power Limited	SELCHP Energy Recovery Facility	5(b)	Installations for the incineration of non-hazardous waste in the scope of Directive 2000/76/EC of the European Parliament and of the Council of 4 December 2000 on the incineration of waste	-0.0464367	51.4855	Landmann Way	The Kennels Site	SE14 5RS	LONDON	GB	0.09506	0.07566
2017	UK.CAED/EW_EA-2764.FACILITY	Veolia ES Birmingham Limited	Tyseley Energy from Waste Plant	5(b)	Installations for the incineration of non-hazardous waste in the scope of Directive 2000/76/EC of the European Parliament and of the Council of 4 December 2000 on the incineration of waste	-1.84175	52.4584	James Road	NA	B11 2BA	Tyseley	GB	0.07595	0.06045
2017	UK.CAED/EW_EA-2764.FACILITY	Veolia ES Birmingham Limited	Tyseley Energy from Waste Plant	5(b)	Installations for the incineration of non-hazardous waste in the scope of Directive 2000/76/EC of the European Parliament and of the Council of 4 December 2000 on the incineration of waste	-1.84175	52.4584	James Road	NA	B11 2BA	Tyseley	GB	0.1519	0.1209
2017	UK.CAED/EW_EA-2939.FACILITY	WasteNotts (Reclamation) Ltd	Eastcroft EFW Plant	5(b)	Installations for the incineration of non-hazardous waste in the scope of Directive 2000/76/EC of the European Parliament and of the Council of 4 December 2000 on the incineration of waste	-1.13517	52.946	Cattle Market Road	Eastcroft Energy from Waste Plant	NG2 3JH	NOTTINGHAM	GB	0.05537	0.04407
2017	UK.CAED/EW_EA-829.FACILITY	The Coventry & Solihull Waste Disposal Company Ltd	Coventry Incinerator EPR/NP3739PD	5(b)	Installations for the incineration of non-hazardous waste in the scope of Directive 2000/76/EC of the European Parliament and of the Council of 4 December 2000 on the incineration of waste	-1.49147	52.396	Bar Road	CSWDC Limited	CV3 4AN	COVENTRY	GB	0.11123	0.08853
2017	UK.CAED/NRW170059.FACILITY	Viridor Waste Management Ltd	Cardiff Energy Recovery Facility	5(b)	Installations for the incineration of non-hazardous waste in the scope of Directive 2000/76/EC of the European Parliament and of the Council of 4 December 2000 on the incineration of waste	-3.14958	51.4709	Ocean Way	Trident Park	CF24 5EN	Cardiff	GB	0.20433	0.16263
2017	UK.SEPA/200000044.Facility	EPR Scotland Limited	Westfield Biomass Plant	5(b)	Installations for the incineration of non-hazardous waste in the scope of Directive 2000/76/EC of the European Parliament and of the Council of 4 December 2000 on the incineration of waste	-3.30583	56.1687	Westfield		KY5 0HR	By Cardenden	GB	0.05488	0.04368
2017	UK.SEPA/200001997.Facility	E.ON UK Plc	Steven's Croft Power Station	5(b)	Installations for the incineration of non-hazardous waste in the scope of Directive 2000/76/EC of the European Parliament and of the Council of 4 December 2000 on the incineration of waste	-3.37996	55.1519	Johnstonebridge Road		DG11 2SQ	Nethercleugh, Lockerbie	GB	0.20188	0.16068
2017	UK.SEPA/200002509.Facility	RWE Markinch Limited	Markinch Biomass CHP	5(b)	Installations for the incineration of non-hazardous waste in the scope of Directive 2000/76/EC of the European Parliament and of the Council of 4 December 2000 on the incineration of waste	-3.16208	56.2015	Markinch		KY7 6PB	Glenrothes	GB	0.23128	0.18408

## Sheet: Table S4
reportingYear	Facility_INSPIRE_ID	parentCompanyName	nameOfFeature	mainActivityCode	mainActivityName	log	lat	streetName	buildingNumber	postalCode	city	countryCode	Biogenic CO2 (Mtons CO2)	Fossil CO2 (Mtons CO2)
2017	CZ.MZP.B645/CZ68607441.FACILITY	ČEZ, a. s.	Elektrárny Poříčí, Hodonín, lokalita Hodonín	1(c)	Thermal power stations and other combustion installations	17.1197	48.847	U Elektrárny	3030/1	69501	Hodonín	CZ	0.379059	0.063771
2017	CZ.MZP.H525/CZ18989196.FACILITY	ČEZ, a. s.	Elektrárny Poříčí, Hodonín, Lokalita Poříčí, provoz Elektrárna Poříčí	1(c)	Thermal power stations and other combustion installations	15.9634	50.5724	Kladská	466	54103	Trutnov	CZ	0.24099	0.52548
2017	CZ.MZP.M712/CZ79386174.FACILITY	Veolia Energie ČR, a.s.	Teplárna Olomouc	1(c)	Thermal power stations and other combustion installations	17.2664	49.5873	Tovární	839/46	77900	Olomouc	CZ	0.01131	0.27492
2017	CZ.MZP.P323/CZ56736663.FACILITY	Plzeňská teplárenská, a.s.	Plzeňská teplárenská, a.s. - areál Teplárna	1(c)	Thermal power stations and other combustion installations	13.399	49.7545	Doubravecká	2760/1	30100	Plzeň 4	CZ	0.261	0.3828
2017	CZ.MZP.S207/CZ92220409.FACILITY	ŠKO-ENERGO, s.r.o.	Teplárna ŠKO-ENERGO s.r.o.	1(c)	Thermal power stations and other combustion installations	14.9345	50.4178	tř. Václava Klementa	869	29301	Mladá Boleslav	CZ	0.12702	0.35235
2017	CZ.MZP.T802/CZ33886785.FACILITY	Veolia Energie ČR, a.s.	Teplárna Frýdek-Místek	1(c)	Thermal power stations and other combustion installations	18.3245	49.6981	Nádražní	391	73925	Sviadnov	CZ	0.055854	0.050286
2017	CZ.MZP.Z724/CZ14837619.FACILITY	Teplárna Otrokovice a.s.	Teplárna Otrokovice	1(c)	Thermal power stations and other combustion installations	17.5203	49.2047	Objízdná	1777	76502	Otrokovice	CZ	0.00435	0.31668
2017	CZ.MZP.Z724/CZ15297397.FACILITY	Alpiq Generation (CZ) s.r.o.	Alpiq Zlín s.r.o. - Teplárna Zlín	1(c)	Thermal power stations and other combustion installations	17.6538	49.2254	třída Tomáše Bati	650	76001	Zlín	CZ	0.02001	0.22881
2017	EE.KAUR.TTR/125.FACILITY	Anne Soojus AS	Anne Soojus AS, Anne koostootmisjaam	1(c)	Thermal power stations and other combustion installations	26.7903	58.3695	-	-	62207	Lohkva küla, Luunja vald	EE	6.65341	0.010788
2017	EE.KAUR.TTR/135.FACILITY	Utilitas Tallinna Elektrijaam OÜ	Utilitas Tallinna Elektrijaam OÜ, Tallinna elektrijaam	1(c)	Thermal power stations and other combustion installations	24.9054	59.4374	Tooma	14	11415	Lasnamäe linnaosa, Tallinn	EE	0.207843	0.027057
2017	EE.KAUR.TTR/156.FACILITY	Fortum Eesti AS	Fortum Eesti AS, Pärnu koostootmisjaam	1(c)	Thermal power stations and other combustion installations	24.5441	58.3992	Niidu	24	80047	Pärnu linn	EE	0.186928	0.0036018
2017	EE.KAUR.TTR/192.FACILITY	Enefit Energiatootmine AS	Enefit Energiatootmine AS, Auvere elektrijaam	1(c)	Thermal power stations and other combustion installations	27.8936	59.2705	-	-	40107	Auvere küla, Narva-Jõesuu linn	EE	0.0174	1.1832
2017	EE.KAUR.TTR/213.FACILITY	Utilitas Tallinna Elektrijaam OÜ	Utilitas Tallinna Elektrijaam OÜ, Väo Reservkatlamaja CHP	1(c)	Thermal power stations and other combustion installations	24.9054	59.4374	Tooma	14	11415	Lasnamäe linnaosa, Tallinn	EE	0.129421	0.0045588
2017	EE.KAUR.TTR/38.FACILITY	Silpower AS	Silpower AS, Sillamäe soojuselektrijaam	1(c)	Thermal power stations and other combustion installations	27.745	59.4037	Kesk	4	40231	Sillamäe linn	EE	0.072993	0.047067
2017	EE.KAUR.TTR/74.FACILITY	Enefit Energiatootmine AS	Enefit Energiatootmine AS, Balti elektrijaam	1(c)	Thermal power stations and other combustion installations	28.1258	59.353	Elektrijaama tee	59	21004	Narva linn	EE	0.1218	1.392
2017	http://paikkatiedot.fi/so/1002031/pf/ProductionFacility/0000001216.ProductionFacility	Loimua Oy	Loimua Oy, Vanajan voimalaitos, Hämeenlinna	1(c)	Thermal power stations and other combustion installations	24.5055	60.9748	Voimatie	32	13110	Hämeenlinna	FI	0.136155	0.043935
2017	http://paikkatiedot.fi/so/1002031/pf/ProductionFacility/0000001262.ProductionFacility	Savon Voima Joensuu Oy	Savon Voima Joensuu Oy, Joensuun voimalaitos	1(c)	Thermal power stations and other combustion installations	29.8379	62.5935	Iiksenvaarantie	2	80260	Joensuu	FI	0.15486	0.10614
[truncated: 76 more rows]
